# Supplementary material for: Synergistic n → π* and nN → π*Ar interactions in C-terminal modified prolines: effect on Xaa–Pro cis/trans equilibrium
Source: Royal Society of Chemistry journal article supplement (doi:10.1039/d3cc01494k), 2023-01-01
Supplement: d3cc01494k1.pdf [file d3cc01494k1.pdf]

## **Supporting Information**

### **Synergistic $n \rightarrow \pi^*$ and $n_N \rightarrow \pi^*_{Ar}$ interactions in C-terminal modified prolines: Effect on Xaa-Pro cis/trans equilibrium**

Jugal Kishore Rai Deka, Debashree Borah, Paramesh Das, Biswajit Sahariah, Pratap Vishnoi, Bani K. Sarma\*

New Chemistry Unit, Jawaharlal Nehru Centre for Advanced Scientific Research (JNCASR), Jakkur, Bangalore 560064, India.

Email: bksarma@jncasr.ac.in

### **Table of Contents**

| <b>SL No.</b> |                                                                                          | <b>Page No.</b> |
|---------------|------------------------------------------------------------------------------------------|-----------------|
| 1.            | General Experimental Information                                                         | 2               |
| 2.            | X-ray crystal structure determination method                                             | 2               |
| 3.            | Computational studies                                                                    | 3               |
| 4.            | 2D-NOESY studies                                                                         | 3               |
| 5.            | Calculation of hydrogen bond acidity parameter A                                         | 4               |
| 6.            | Concentration-dependent $^1\text{H-NMR}$ studies                                         | 4               |
| 7.            | Supplementary Figures and Tables                                                         | 4               |
| 8.            | Synthetic protocols and characterizations                                                | 9               |
| 9.            | 2D-NOESY spectra of the newly synthesized compounds                                      | 16              |
| 10.           | $^1\text{H}$ , $^{13}\text{C}$ and $^{19}\text{F}$ NMR spectra of all reported compounds | 33              |
| 11.           | Cartesian Coordinates                                                                    | 48              |
| 12.           | References                                                                               | 53              |

## 1. General Experimental Information

All reagents were purchased from commercial sources (Sigma-Aldrich, Alfa Aesar, Spectrochem, CDH and TCI) and were used without further purification. Anhydrous solvents for reaction purposes were purchased from commercial sources (Chemlabs, Finar and Rankem) and were used without further purification. Column chromatography was performed on silica gel (100-200 mesh particle size) as a stationary phase using commercial solvents as mobile phase (hexane, ethylacetate and methanol). The reactions were monitored by thin layer chromatography (TLC) on silica gel 60 F<sub>254</sub> (Merck). The NMR spectra were recorded in CDCl<sub>3</sub>, [CD<sub>3</sub>]<sub>2</sub>SO and D<sub>2</sub>O or as stated deuterated solvents. <sup>1</sup>H (400 MHz), <sup>13</sup>C (100 and 150 MHz) and <sup>19</sup>F (564 MHz) NMR were obtained on Bruker 400 MHz and Jeol 600 MHz NMR spectrometer using tetramethylsilane (TMS) as an internal standard. <sup>1</sup>H, <sup>13</sup>C and <sup>19</sup>F NMR spectra were recorded at ambient temperature in CDCl<sub>3</sub>, [CD<sub>3</sub>]<sub>2</sub>SO, and D<sub>2</sub>O. Chemical shifts (δ) are reported in part per million (ppm) relative to residual undeuterated solvent as an internal reference (<sup>1</sup>H: δ 7.26 for CDCl<sub>3</sub>, δ 2.50 for [CD<sub>3</sub>]<sub>2</sub>SO, and δ 4.79 for D<sub>2</sub>O; <sup>13</sup>C: δ 77.16 for CDCl<sub>3</sub>). Chemical shifts for fluorine are reported in parts per million from CFCl<sub>3</sub> (δ 0 ppm) as the external standard. Abbreviations of NMR peak multiplicities were explained as s = singlet, d = doublet, t = triplet, q = quartet, m = multiplet, br = broad signal and dd = doublet of doublets. NMR data were processed by using MestReNova and Delta software. HRMS data were obtained using Electron Spray Ionization (ESI) "G6538A UHD Accurate-Mass Quadrupole Time-of-Flight (Q-TOF) LC/MS system (Agilent Technologies, Santa Clara, CA, USA) equipped with Agilent 1290 UPLC system". In case of isotopic pattern, we reported the highest intensity peak mass.

## 2. X-ray crystal structure determination method

The compounds were crystallized by slow evaporation method. The compounds (2-3 mg) were dissolved in 1 mL solvent (Table S4) in 10 mL Borosil beaker. The beaker was covered with either parafilm or Aluminium foil depending upon the volatility of the solvents used. Aluminium foil was used for volatile solvents. One or two pinholes were made on the parafilm, or aluminium foil and the beakers were kept at ambient temperature. Solvents were allowed to slowly evaporate to dryness. The crystals obtained were observed through a microscope and the best of the crystals were mounted for data collection.

Single crystal structures of the compounds were determined by measuring x-ray intensity data on a D8 venture *APEX 3*<sup>1</sup> X-ray diffractometer equipped with monochromatised micro-focus sources of Mo K $\alpha$  radiation ( $\lambda = 0.71073 \text{ \AA}$ ). Data collections were done in phi ( $\phi$ ) and omega

( $\omega$ ) scan strategy at low and room temperature (297 K-300 K). Data was processed by SAINT<sup>2</sup> and absorption correction was done using SADABS<sup>3</sup> implemented in APEX 3. The structures were solved by using XSELL program based on SHELX<sup>4</sup> program implemented in APEX 3 and Olex2 1.5 (Bourhis et al., 2015) (Dolomanov et al., 2009) (compiled 2022.04.07 svn.rca3783a0 for OlexSys, GUI svn.r6498). The non-hydrogen atoms were refined anisotropically and all the hydrogen atoms were assigned in idealized locations. All the structures were deposited in the CCDC<sup>5</sup> (CCDC No: **2239865-2239866**, **2240713** and **2240910**) database.

### 3. Computational Studies

All the calculations were performed by using Gaussian09/16 suite quantum chemistry program.<sup>6</sup> We optimized each conformer using the hybrid Minnesota functional (M06-2X)/6-311+G(2d,p) level of theory.<sup>7</sup> Frequency calculations were also done at the same level of theory. To keep the overall environment water, we also used implicit solvent model SMD (solvent = water) developed by Truhlar and co-workers.<sup>8</sup> The stabilization energies due to the orbital interactions were evaluated using Natural Bond Orbital (NBO)<sup>9</sup> analyses. As the default amide configuration in NBO analysis is a C=O double bond with an unconjugated nitrogen lone pair,  $n_{\text{N}}(\text{amide}) \rightarrow \pi^*_{\text{Ar}}$  interaction energies are likely to be overestimated. Therefore, we also carried out NBO analysis for the resonance structure [ $^{(+)}\text{N}=\text{C}-\text{O}^{(-)}$ ] of the donor amide (NHCO), which, as expected, showed no  $n_{\text{N}}(\text{amide}) \rightarrow \pi^*_{\text{Ar}}$  interaction as the nitrogen lone pair is completely in conjugation with the CO group in such a structure. Previous studies have indicated that the non-delocalized structure having C=O double bond with an unconjugated nitrogen lone pair contributes ~60% and the delocalized structure with N $\rightarrow$ CO delocalization contributes ~30% to the resonance hybrid of acetamide.<sup>10</sup> Therefore, we have presented the NBO energies as a weighted average by using 60% contribution for non-delocalized structure, which should provide a more accurate representation of the NBO  $n_{\text{N}}(\text{amide}) \rightarrow \pi^*_{\text{Ar}}$  interaction energies.

### 4. 2D-NOESY studies

2D gradient Nuclear Overhauser Effect Spectroscopy (NOESY)  $^1\text{H}$ - $^1\text{H}$  Correlation (spin-lattice relaxation) NMR experiments were performed on a Bruker 400 MHz spectrometer using the following parameters – 5 mm PABBO BB/ probe or 5 mm DUL 13C-1, noesygpplpp pulse sequence, NS = 4, 8 and 32 (number of scans, 8\*n), DS = 4 or 32 (numbers of dummy scans were run prior to acquisition), D1= 1.98976004 sec (relaxation delay or mixing time between 1- 5 sec) and P1= 12.85 or 13.26 usec ( $^1\text{H}$  90° pulse).

## 5. Calculation of hydrogen bond acidity parameter A

The hydrogen bond acidity parameter A is calculated with the following equations by using chemical shift difference of a proton in DMSO-d<sub>6</sub> and CDCl<sub>3</sub>.<sup>11</sup>

$$\delta\Delta = \delta(\text{DMSO-d}_6) - \delta(\text{CDCl}_3) \quad (1)$$

$$A = 0.0065 + 0.133 \delta\Delta \quad (2)$$

## 6. Concentration-dependent <sup>1</sup>H-NMR studies

A 100 mM stock solution of the compounds was prepared in 0.6 mL (600 μL) of deuterated CDCl<sub>3</sub>. After that serial dilution was done to make the solution of required concentration between 100 to 1 mM by diluting with deuterated CDCl<sub>3</sub>.

## 7. Supplementary Figures and Tables

**Table S1.** Amidic NH chemical shift values (ppm) and hydrogen bond acidity parameter A of Pro-DAH 1-6.

| Comp     | R                | CDCl <sub>3</sub> | (CD <sub>3</sub> ) <sub>2</sub> SO | δΔ    | A     |
|----------|------------------|-------------------|------------------------------------|-------|-------|
|          |                  | (NH peak)         | (NH peak)                          | t-t-c | t-t-c |
| <b>1</b> | NMe <sub>2</sub> | 9.67              | 10.34                              | 0.67  | 0.096 |
| <b>2</b> | OMe              | 9.62              | 10.37                              | 0.75  | 0.106 |
| <b>3</b> | H                | 9.65              | 10.39                              | 0.74  | 0.105 |
| <b>4</b> | CF <sub>3</sub>  | 9.78              | 10.44                              | 0.66  | 0.094 |
| <b>5</b> | CN               | 9.71              | 10.45                              | 0.74  | 0.105 |
| <b>6</b> | NO <sub>2</sub>  | 9.75              | 10.48                              | 0.73  | 0.104 |

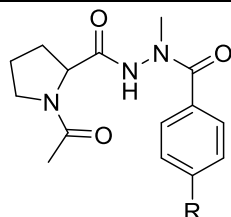

**Table S2:** Table showing the equilibrium constant  $K_{t/c}$  and Hammett parameter ( $\sigma_P$ )<sup>12</sup> for the para-substituents of Pro-DAH **1-6** in D<sub>2</sub>O (20 mM).

| Comp     | R                | $\sigma_P$ | Rotamers % in D <sub>2</sub> O |     | $K_{t/c}$ D <sub>2</sub> O | Rotamers % in [CD <sub>3</sub> ] <sub>2</sub> SO |     | $K_{t/c}$ [CD <sub>3</sub> ] <sub>2</sub> SO |
|----------|------------------|------------|--------------------------------|-----|----------------------------|--------------------------------------------------|-----|----------------------------------------------|
|          |                  |            | trans                          | cis |                            | trans                                            | cis |                                              |
| <b>1</b> | NMe <sub>2</sub> | -0.83      | 73                             | 27  | 2.7                        | 67                                               | 33  | 2.0                                          |
| <b>2</b> | OMe              | -0.27      | 75                             | 25  | 3.0                        | 68                                               | 32  | 2.1                                          |
| <b>3</b> | H                | 0.0        | 77                             | 23  | 3.4                        | 69                                               | 31  | 2.2                                          |
| <b>4</b> | CF <sub>3</sub>  | 0.54       | 79                             | 21  | 3.8                        | 70                                               | 30  | 2.3                                          |
| <b>5</b> | CN               | 0.66       | 80                             | 20  | 4.0                        | 72                                               | 28  | 2.6                                          |
| <b>6</b> | NO <sub>2</sub>  | 0.78       | 81                             | 19  | 4.3                        | 74                                               | 26  | 2.8                                          |

**Table S3.** Concentration-dependent amidic NH proton chemical shifts of trans-trans-cis (t-t-c) conformer of Pro-DAH **2-4** & **6** in CDCl<sub>3</sub>.

| Concentration (mM) | <b>2</b> (R = OMe) | <b>3</b> (R = H) | <b>4</b> (R = CF <sub>3</sub> ) | <b>6</b> (R = NO <sub>2</sub> ) |
|--------------------|--------------------|------------------|---------------------------------|---------------------------------|
| 100                | 9.62               | 9.68             | 9.77                            | 9.73                            |
| 90                 | 9.62               | 9.68             | 9.77                            | 9.73                            |
| 80                 | 9.62               | 9.68             | 9.77                            | 9.73                            |
| 70                 | 9.62               | 9.68             | 9.77                            | 9.73                            |
| 60                 | 9.62               | 9.68             | 9.77                            | 9.73                            |
| 50                 | 9.62               | 9.67             | 9.77                            | 9.74                            |
| 40                 | 9.61               | 9.67             | 9.78                            | 9.74                            |
| 30                 | 9.61               | 9.67             | 9.78                            | 9.74                            |
| 20                 | 9.61               | 9.67             | 9.78                            | 9.74                            |
| 10                 | 9.61               | 9.67             | 9.78                            | 9.74                            |
| 1                  | 9.61               | 9.67             | 9.78                            | 9.74                            |

**Table S4.** Structural parameters and NBO data of Pro-DAH molecules obtained from geometry optimizations (in water) and NBO analyses carried out at M06-2X/6-311+G(2d,p) level of theory.

| Comp.    | R                | $d_{O\dots C}$ (Å)                  | $n_O \rightarrow \pi^*_{C=O}$ (kcal·mol <sup>-1</sup> ) |
|----------|------------------|-------------------------------------|---------------------------------------------------------|
|          |                  | CO <sub>NH</sub> ⋯CO <sub>NMe</sub> | CO <sub>NH</sub> ⋯CO <sub>NMe</sub>                     |
| <b>1</b> | NMe <sub>2</sub> | 2.886                               | 0.82                                                    |
| <b>2</b> | OMe              | 2.896                               | 0.82                                                    |
| <b>3</b> | H                | 2.914                               | 0.76                                                    |
| <b>5</b> | CN               | 2.909                               | 0.81                                                    |
| <b>6</b> | NO <sub>2</sub>  | 2.911                               | 0.81                                                    |

**Table S5.** Details of Crystallization conditions and their CCDC number. All compounds were crystallized at room temperature (RT).

| Comp | Crystallization Solvents           | CCDC    | Resolution (Å) |
|------|------------------------------------|---------|----------------|
| 2    | Dichloromethane-Methanol (3:1), RT | 2240713 | 0.70           |
| 3    | Acetone, RT                        | 2239866 | 0.80           |
| 4    | Ethyl acetate-Methanol (1:1), RT   | 2239865 | 0.81           |
| 5    | Acetone, RT                        | 2240910 | 0.70           |

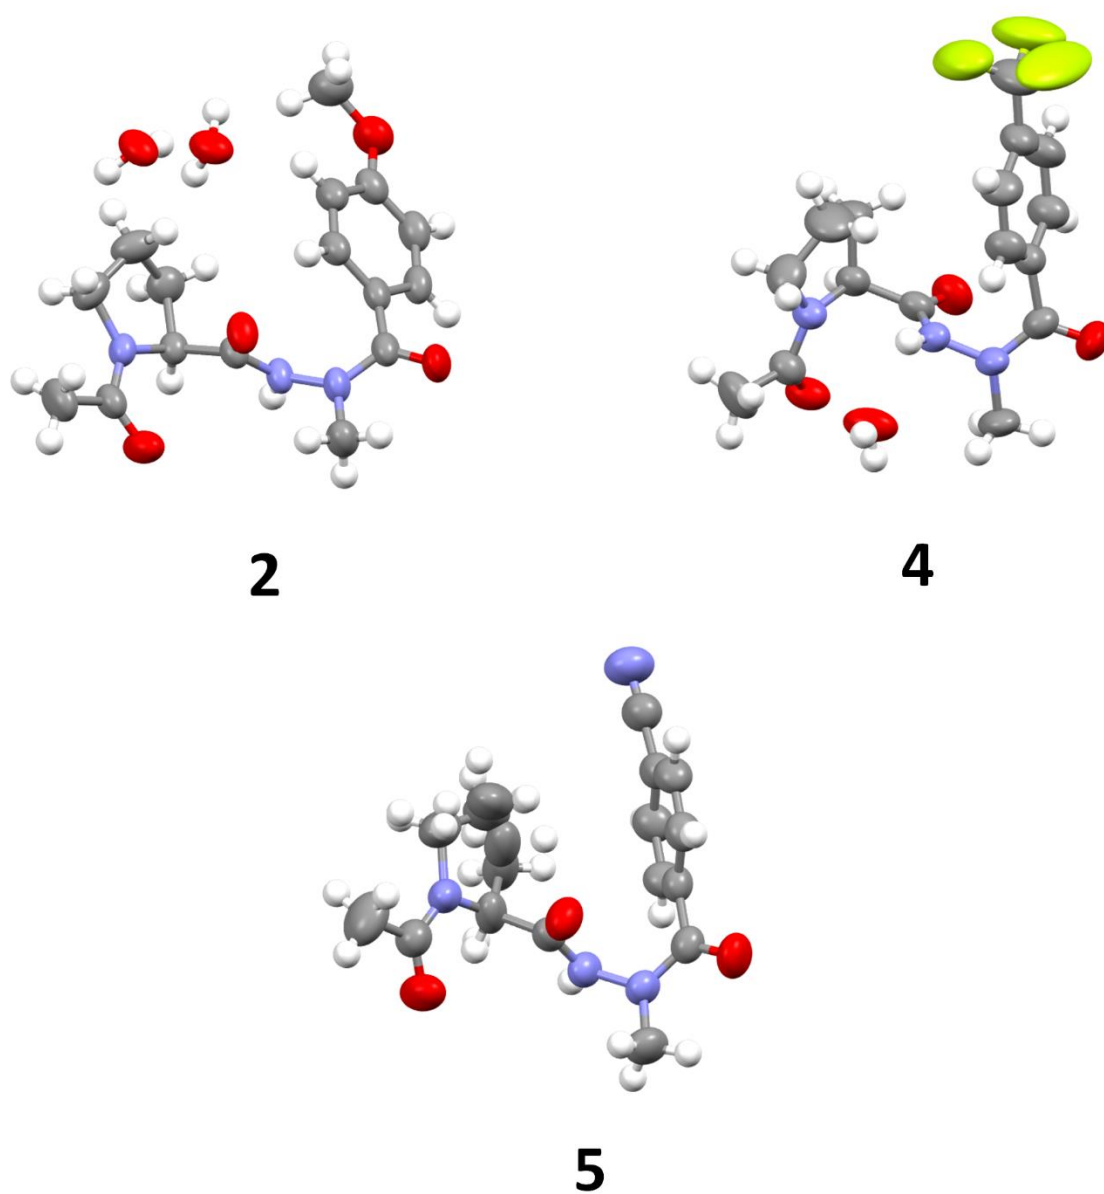

**Figure S1.** Crystal Structures of 2 and 4-5 showing 50 % ellipsoid probability.

**Table S6.** Details of Crystal Structures for **2-4** and **5**.

|                             | <b>2</b>                                                                                                        | <b>3</b>                                                                                               |
|-----------------------------|-----------------------------------------------------------------------------------------------------------------|--------------------------------------------------------------------------------------------------------|
| Empirical formula           | C <sub>16</sub> H <sub>25</sub> N <sub>3</sub> O <sub>6</sub>                                                   | C <sub>15</sub> H <sub>19</sub> N <sub>3</sub> O <sub>3</sub>                                          |
| Formula weight              | 355.39                                                                                                          | 289.34                                                                                                 |
| Temperature                 | 299 K                                                                                                           | 300 K                                                                                                  |
| Wavelength                  | 0.71073 Å                                                                                                       | 0.71073 Å                                                                                              |
| Crystal system              | Monoclinic                                                                                                      | Orthorhombic                                                                                           |
| Space group                 | P 1 21 1                                                                                                        | P 21 21 21                                                                                             |
| Unit cell dimensions        | a = 9.5736 (9), $\alpha$ = 90°;<br>b = 8.7880 (7), $\beta$ = 106.122° (4);<br>c = 11.6294 (11), $\gamma$ = 90°; | a = 8.3640 (3), $\alpha$ = 90°;<br>b = 10.6149 (5), $\beta$ = 90°;<br>c = 17.5618 (9), $\gamma$ = 90°; |
| Volume                      | 939.94 (15)                                                                                                     | 1559.19 (12)                                                                                           |
| Z                           | 2                                                                                                               | 4                                                                                                      |
| Density                     | 1.256 g/cm <sup>3</sup>                                                                                         | 1.233 g/cm <sup>3</sup>                                                                                |
| Absorption coefficient      | 0.096                                                                                                           | 0.087                                                                                                  |
| F (000)                     | 380                                                                                                             | 616                                                                                                    |
| Crystal size                | 0.05 x 0.25 x 0.30                                                                                              | 0.057 x 0.097 x 0.310                                                                                  |
| Theta max.                  | 27.84                                                                                                           | 21.48                                                                                                  |
| Theta min.                  | 2.21                                                                                                            | 2.24                                                                                                   |
| Reflections collected       | 16661                                                                                                           | 16192                                                                                                  |
| Independent reflections     | 3717                                                                                                            | 3136                                                                                                   |
| Absorption correction       | Multi-scan with SADABS                                                                                          | Multi-scan with SADABS                                                                                 |
| Max. and min.               | 0.7461 and 0.6748                                                                                               | 0.9705 and 0.8947                                                                                      |
| Transmission                |                                                                                                                 |                                                                                                        |
| Goodness-of-fit on $F^2$    | 1.021                                                                                                           | 1.12                                                                                                   |
| R1 ( $I > 2\sigma(I)$ )     | 0.0393                                                                                                          | 0.0401                                                                                                 |
| wR2 ( $I > 2\sigma(I)$ )    | 0.0867                                                                                                          | 0.0904                                                                                                 |
| R1 (all data)               | 0.0763                                                                                                          | 0.0761                                                                                                 |
| wR2 (all data)              | 0.1053                                                                                                          | 0.1141                                                                                                 |
| R <sub>int</sub> (all data) | 0.0299                                                                                                          | 0.0480                                                                                                 |

|                             | 4                                                                                         | 5                                                                                    |
|-----------------------------|-------------------------------------------------------------------------------------------|--------------------------------------------------------------------------------------|
| Empirical formula           | C <sub>16</sub> H <sub>20</sub> F <sub>3</sub> N <sub>3</sub> O <sub>4</sub>              | C <sub>16</sub> H <sub>18</sub> N <sub>4</sub> O <sub>3</sub>                        |
| Formula weight              | 375.35                                                                                    | 314.35                                                                               |
| Temperature                 | 300 K                                                                                     | 297 K                                                                                |
| Wavelength                  | 0.71073 Å                                                                                 | 0.71073 Å                                                                            |
| Crystal system              | Monoclinic                                                                                | Orthorhombic                                                                         |
| Space group                 | C 1 2 1                                                                                   | P 21 21 21                                                                           |
| Unit cell dimensions        | a = 16.380 (3), α = 90°;<br>b = 6.0768 (12), β = 93.389° (9);<br>c = 18.447 (4), γ = 90°; | a = 6.8839 (4), α = 90°;<br>b = 14.6506 (11), β = 90°;<br>c = 16.5975 (12), γ = 90°; |
| Volume                      | 1833.0 (6)                                                                                | 1673.9 (2)                                                                           |
| Z                           | 4                                                                                         | 4                                                                                    |
| Density                     | 1.360 g/cm <sup>3</sup>                                                                   | 1.247 g/cm <sup>3</sup>                                                              |
| Absorption coefficient      | 0.118                                                                                     | 0.089                                                                                |
| F (000)                     | 784                                                                                       | 664                                                                                  |
| Crystal size                | 0.078 x 0.098 x 0.135                                                                     | 0.023 x 0.120 x 0.168                                                                |
| Theta max.                  | 23.38                                                                                     | 21.10                                                                                |
| Theta min.                  | 2.21                                                                                      | 2.78                                                                                 |
| Reflections collected       | 10302                                                                                     | 19160                                                                                |
| Independent reflections     | 2345                                                                                      | 3151                                                                                 |
| Absorption correction       | Multi-scan with SADABS                                                                    | Multi-scan with SADABS                                                               |
| Max. and min.               | 0.745 and 0.582                                                                           | 0.7461 and 0.6740                                                                    |
| Transmission                |                                                                                           |                                                                                      |
| Goodness-of-fit on $F^2$    | 0.997                                                                                     | 1.144                                                                                |
| R1 ( $I > 2\sigma(I)$ )     | 0.0596                                                                                    | 0.0495                                                                               |
| wR2 ( $I > 2\sigma(I)$ )    | 0.1572                                                                                    | 0.1235                                                                               |
| R1 (all data)               | 0.1229                                                                                    | 0.1563                                                                               |
| wR2 (all data)              | 0.1950                                                                                    | 0.1990                                                                               |
| R <sub>int</sub> (all data) | 0.0407                                                                                    | 0.0492                                                                               |



## 8. Synthetic protocols and characterization.

### 6.1. General scheme for the synthesis of Proline-diacylhydrazines (Pro-DAH) **1-6**.

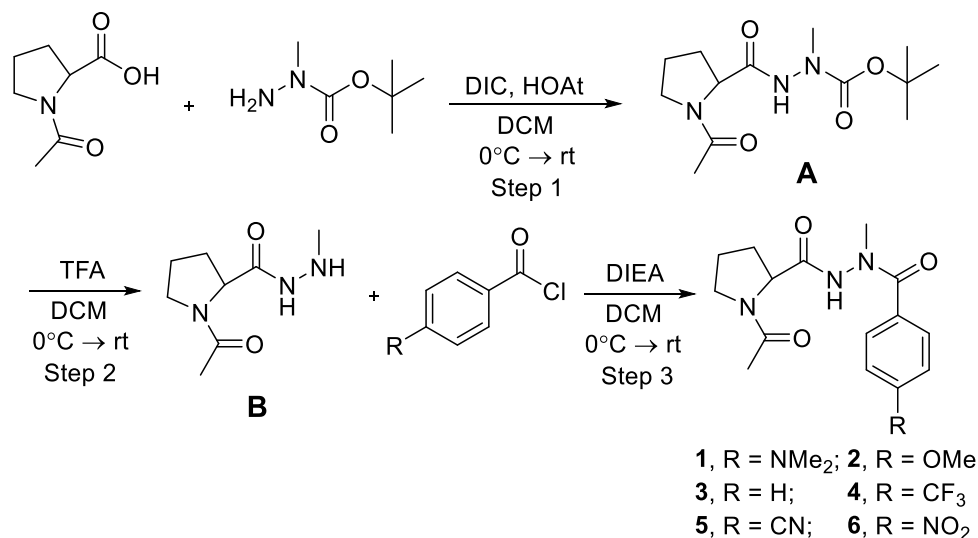

#### Procedure:

**Step 1:** In a two-neck Rb flask,  $x = 1.00$  gm of N-acetyl-L-proline [ $y = 6.36$  mmol (1 eqv.)] were activated by using coupling reagents,  $x' = 1.18$  mL of *N,N'*-diisopropylcarbodiimide (DIC) [ $y' = 7.64$  mmol (1.2 eqv.)] and  $x'' = 1.04$  gm of 1-Hydroxy-7-azabenzotriazole (HOAt) [ $y'' = 7.64$  mmol (1.2 eqv.)] at 0°C and stirred for 15 minutes. Then  $x''' = 0.94$  mL of tert-butyl 2-methylcarbazate [ $y''' = 6.36$  mmol (1 eqv.)] were added slowly into the reaction mixture at 0°C. Then the reaction mixture was warmed to room temperature and stirred for another 1 h. The solvent was evaporated to dryness by using the rotary evaporator. The reaction mixture was dissolved in CH<sub>2</sub>Cl<sub>2</sub> and washed twice with water, then a 10% citric acid solution followed by a saturated sodium bicarbonate (NaHCO<sub>3</sub>) solution and finally with brine solution. The organic layer was dried over Na<sub>2</sub>SO<sub>4</sub> and evaporated under reduced pressure. The final residue was then purified by the column chromatography using silica gel (100-200 Mesh) and gradient of hexane and ethyl acetate as an eluent.

**Step 2:**  $x = 2.68$  mL of trifluoroacetic acid (TFA) [ $y = 35.0$  mmol (10 eqv.)] were added slowly to a solution of  $x' = 1.00$  gm **A** [ $y' = 3.50$  mmol (1 eqv.)] in CH<sub>2</sub>Cl<sub>2</sub> (3-5 mL) at 0 °C over a period of 15 minutes. The reaction mixture was allowed to warm to room temperature and stirred for another 2 h 45 minutes. The solvent was evaporated to dryness under reduced pressure and purged with Nitrogen or Argon for 15 minutes to remove the TFA completely. The final residue was used for the next step directly.

**Step 3:**  $x = 100$  mg of compound **B** [ $y = 0.54$  mmol (1 eqv.)] was dissolved in 15 mL of  $\text{CH}_2\text{Cl}_2$  and neutralised with a  $x' = 185$   $\mu\text{L}$  of *N,N*-diisopropylethylamine [DIEA- $y' = 1.08$  mmol (2 eqv.)] at 0 °C. Then  $x''$  mg/ $\mu\text{L}$  of acyl chloride [ $y''$  mmol (1.5 eqv.)] were added slowly into the reaction mixture at 0 °C. The reaction mixture was warmed to room temperature and stirred for 1 h. The solvent was evaporated to dryness by using the rotary evaporator. The reaction mixture was dissolved in  $\text{CH}_2\text{Cl}_2$  and washed twice with water, then a 10% citric acid solution followed by a saturated sodium bicarbonate ( $\text{NaHCO}_3$ ) solution and finally with brine solution. The organic layer was dried over  $\text{Na}_2\text{SO}_4$  and evaporated under reduced pressure. The final residue was then purified by the column chromatography using Silica Gel (100-200 Mesh) as the stationary phase and a gradient of hexane/ethyl acetate/methanol as eluent.

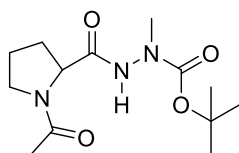

Compound **A**: tert-butyl 2-(acetylpropyl)-1-methylhydrazine-1-carboxylate.

**Step 1.** Yield (%): 85 % as a white solid.

$^1\text{H}$  NMR 400 MHz (20 mM,  $\text{CDCl}_3$ )  $\delta$  ppm: 9.08 (brs, 1H, NH), 4.55 (brd,  $J = 8.0$  Hz, 1H,  $\alpha$ -CH), 3.60-3.55 (m, 1H,  $\delta$ - $\text{CH}_2$ ), 3.47-3.40 (m, 1H,  $\delta$ - $\text{CH}_2$ ), 3.09 (s, 3H,  $\text{NCH}_3$ ), 2.52-2.48 (m, 1H,  $\beta$ - $\text{CH}_2$ ), 2.12 [s, 3H,  $\text{C}(\text{O})\text{-CH}_3$ ], 2.03-1.96 [m, 1H,  $\beta$ - $\text{CH}_2$ ], 1.84-1.77 (m, 2H,  $\gamma$ - $\text{CH}_2$ );  $^{13}\text{C}$  NMR (150 MHz,  $\text{CDCl}_3$ )  $\delta$  ppm: 171.3, 169.6, 155.2, 80.7, 57.9, 48.5, 37.0, 28.3, 26.8, 25.2, 22.6; HRMS  $[\text{M} + \text{H}]^+$  calcd. for,  $\text{C}_8\text{H}_{16}\text{N}_3\text{O}_2$ ,  $m/z$ : 186.1243; found  $m/z$ : 186.1234 (without Boc).

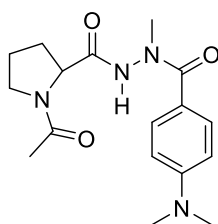

Compound **1**: 1-acetyl-*N'*-[4-(dimethylamino)benzoyl]-*N'*-methylpyrrolidine-2-carbohydrazide.

**Step 3.**  $x'' = 149$  mg of 4-(dimethylamino)benzoyl chloride [ $y'' = 0.810$  mmol (1.5 eqv.)]. Yield (%): 65 % as a white solid.

$^1\text{H}$  NMR 400 MHz (20 mM,  $\text{CDCl}_3$ )  $\delta$  ppm [t-t-c rotamer:  $\sim 100\%$ ]: 9.67 (s, 1H, NH), 7.37 (d, 2H,  $J = 8.0$  Hz, Ph-NMe<sub>2</sub>), 6.58 (d, 2H,  $J = 8.0$  Hz, Ph-NMe<sub>2</sub>), 4.45 (brd,  $J = 4.0$  Hz, 1H,  $\alpha$ -CH), 3.31-3.20 (m, 2H,  $\delta$ -CH<sub>2</sub>), 3.25 (s, 3H, NCH<sub>3</sub>), 2.97 [s, 6H, N-(CH<sub>3</sub>)<sub>2</sub>], 2.39-2.36 (m, 1H,  $\beta$ -CH<sub>2</sub>), 1.97 [s, 3H, C(O)-CH<sub>3</sub>], 1.89 [brs, 1H,  $\beta$ -CH<sub>2</sub>], 1.89 (brs, 1H,  $\gamma$ -CH<sub>2</sub>), 1.74-1.72 (m, 1H,  $\gamma$ -CH<sub>2</sub>);  $^1\text{H}$  NMR 400 MHz [20 mM, (CD<sub>3</sub>)<sub>2</sub>SO]  $\delta$  ppm [t-t-c rotamer: 67 %]: 10.34 (brs, 1H, NH), 7.35 (d, 2H,  $J = 8.0$  Hz, Ph-NMe<sub>2</sub>), 6.63 (d, 2H,  $J = 8.0$  Hz, Ph-NMe<sub>2</sub>), 4.08 (dd,  $J = 10.0$  Hz,  $J = 4.0$  Hz, 1H,  $\alpha$ -CH), 3.45-3.22 (m, 2H,  $\delta$ -CH<sub>2</sub>), 3.01 (s, 3H, NCH<sub>3</sub>), 2.92 [s, 6H, N(CH<sub>3</sub>)<sub>2</sub>], 1.95 [s, 3H, C(O)-CH<sub>3</sub>], 1.81-1.55 (m, 4H,  $\beta$ ,  $\gamma$ -CH<sub>2</sub>); [c-t-c rotamer: 33 %]: 10.66 (s, 1H, NH), 7.34 (d, 2H,  $J = 8.0$  Hz, Ph-NMe<sub>2</sub>), 6.63 (d, 2H,  $J = 8.0$  Hz, Ph-NMe<sub>2</sub>), 4.18 (brd,  $J = 8.0$  Hz, 1H,  $\alpha$ -CH), 3.45-3.22 (m, 2H,  $\delta$ -CH<sub>2</sub>), 3.04 (s, 3H, NCH<sub>3</sub>), 2.92 [s, 6H, N(CH<sub>3</sub>)<sub>2</sub>], 1.32 [s, 3H, C(O)-CH<sub>3</sub>], 1.81-1.23 (m, 4H,  $\beta$ ,  $\gamma$ -CH<sub>2</sub>);  $^1\text{H}$  NMR 400 MHz (20 mM, D<sub>2</sub>O)  $\delta$  ppm [t-t-c rotamer: 73 %]: 7.35 (d, 2H,  $J = 8.0$  Hz, Ph-NMe<sub>2</sub>), 6.83 (d, 2H,  $J = 8.0$  Hz, Ph-NMe<sub>2</sub>), 4.20 (brs, 1H,  $\alpha$ -CH), 3.46 (brs, 2H,  $\delta$ -CH<sub>2</sub>), 3.18 (s, 3H, NCH<sub>3</sub>), 2.89 [brs, 6H, N(CH<sub>3</sub>)<sub>2</sub>], 2.05 [s, 3H, C(O)-CH<sub>3</sub>], 1.89 (brs, 1H,  $\beta$ -CH<sub>2</sub>), 1.75 (brs, 1H,  $\beta$ -CH<sub>2</sub>), 1.52 (brs, 1H,  $\gamma$ -CH<sub>2</sub>), 1.20-1.18 (m, 1H,  $\gamma$ -CH<sub>2</sub>); [c-t-c rotamer: 27 %]: 7.35 (d, 2H,  $J = 8.0$  Hz, Ph-NMe<sub>2</sub>), 6.81 (d, 2H,  $J = 8.0$  Hz, Ph-NMe<sub>2</sub>), 4.33 (brs, 1H,  $\alpha$ -CH), 3.39-3.32 (m, 2H,  $\delta$ -CH<sub>2</sub>), 3.20 (s, 3H, NCH<sub>3</sub>), 2.88 [brs, 6H, N(CH<sub>3</sub>)<sub>2</sub>], 2.12 [brs, 3H, C(O)-CH<sub>3</sub>], 1.92 (brs, 2H,  $\beta$ -CH<sub>2</sub>), 1.53 (brs, 1H,  $\gamma$ -CH<sub>2</sub>), 1.13 (brs, 1H,  $\gamma$ -CH<sub>2</sub>);  $^{13}\text{C}$  NMR (150 MHz,  $\text{CDCl}_3$ )  $\delta$  ppm: 173.2, 171.1, 169.4, 151.6, 129.1, 121.6, 110.5, 63.7, 57.8, 47.9, 40.1, 37.0, 26.5, 24.7, 22.3; [M + H]<sup>+</sup> calcd. for, C<sub>17</sub>H<sub>25</sub>N<sub>4</sub>O<sub>3</sub>, m/z: 333.1927; found m/z: 333.1915.

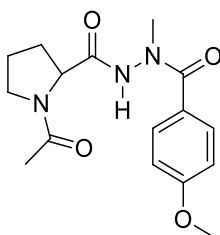

Compound 2: 1-acetyl-*N'*-[4-methoxybenzoyl]-*N'*-methylpyrrolidine-2-carbohydrazide.

**Step 3.**  $x'' = 109$   $\mu\text{L}$  of 4-methoxybenzoyl chloride [ $y'' = 0.810$  mmol (1.5 eq.)]. Yield (%): 78 % as a white solid.

$^1\text{H}$  NMR 400 MHz (20 mM,  $\text{CDCl}_3$ )  $\delta$  ppm [t-t-c rotamer:  $\sim 100\%$ ]: 9.62 (s, 1H, NH), 7.39 (d, 2H,  $J = 8.0$  Hz, Ph-OMe), 6.82 (d, 2H,  $J = 8.0$  Hz, Ph-OMe), 4.41 (brd,  $J = 4.0$  Hz, 1H,  $\alpha$ -CH), 3.81 (s, 3H, O-CH<sub>3</sub>), 3.25 (s, 3H, NCH<sub>3</sub>), 3.22-3.20 (m, 1H,  $\delta$ -CH<sub>2</sub>), 3.07 (brs, 1H,  $\delta$ -CH<sub>2</sub>), 2.41-2.40 (m, 1H,  $\beta$ -CH<sub>2</sub>), 1.95 [s, 3H, C(O)-CH<sub>3</sub>], 1.89-1.86 [brs, 1H,  $\beta$ -CH<sub>2</sub>], 1.82-1.79 (m, 1H,  $\gamma$ -CH<sub>2</sub>), 1.68-1.63 (m, 1H,  $\gamma$ -CH<sub>2</sub>);  $^1\text{H}$  NMR 400 MHz [20 mM, (CD<sub>3</sub>)<sub>2</sub>SO]  $\delta$  ppm [t-t-c

rotamer: 68 %]: 10.37 (brs, 1H, NH), 7.40 (d, 2H,  $J = 8.0$  Hz, Ph-OMe), 6.91 (d, 2H,  $J = 8.0$  Hz, Ph-OMe), 4.06 (brd,  $J = 4.0$  Hz, 1H,  $\alpha$ -CH), 3.77 (s, 3H, OCH<sub>3</sub>), 3.42-3.21 (m, 2H,  $\delta$ -CH<sub>2</sub>), 3.03 (s, 3H, NCH<sub>3</sub>), 1.94 [s, 3H, C(O)-CH<sub>3</sub>], 1.78-1.17 (m, 4H,  $\beta$ ,  $\gamma$ -CH<sub>2</sub>); [c-t-c rotamer: 32 %]: 10.70 (s, 1H, NH), 7.40 (d, 2H,  $J = 8.0$  Hz, Ph-OMe), 6.91 (d, 2H,  $J = 8.0$  Hz, Ph-OMe), 4.17 (brd,  $J = 8.0$  Hz, 1H,  $\alpha$ -CH), 3.76 (s, 3H, OCH<sub>3</sub>), 3.42-3.21 (m, 2H,  $\delta$ -CH<sub>2</sub>), 3.07 (s, 3H, NCH<sub>3</sub>), 1.35 [s, 3H, C(O)-CH<sub>3</sub>], 1.78-1.17 (m, 4H,  $\beta$ ,  $\gamma$ -CH<sub>2</sub>); <sup>1</sup>H NMR 400 MHz (20 mM, D<sub>2</sub>O)  $\delta$  ppm [t-t-c rotamer: 75 %]: 7.43 (d, 2H,  $J = 8.0$  Hz, Ph-OMe), 7.05 (d, 2H,  $J = 8.0$  Hz, Ph-OMe), 4.21 (brs, 1H,  $\alpha$ -CH), 3.87 (s, 3H, OCH<sub>3</sub>), 3.50 (t, 2H,  $J = 8.0$  Hz,  $\delta$ -CH<sub>2</sub>), 3.23 (s, 3H, NCH<sub>3</sub>), 2.08 [s, 3H, C(O)-CH<sub>3</sub>], 1.85-1.77 (m, 2H,  $\beta$ -CH<sub>2</sub>), 1.53 (brs, 1H,  $\gamma$ -CH<sub>2</sub>), 1.13 (brs, 1H,  $\gamma$ -CH<sub>2</sub>); [c-t-c rotamer: 25 %]: 7.45 (d, 2H,  $J = 8.0$  Hz, Ph-OMe), 7.05 (d, 2H,  $J = 8.0$  Hz, Ph-OMe), 4.39 (brd,  $J = 8.0$  Hz, 1H,  $\alpha$ -CH), 3.87 (s, 3H, OCH<sub>3</sub>), 3.43-3.32 (m, 2H,  $\delta$ -CH<sub>2</sub>), 3.26 (s, 3H, NCH<sub>3</sub>), 2.07 [brs, 3H, C(O)-CH<sub>3</sub>], 1.92 (brs, 2H,  $\beta$ -CH<sub>2</sub>), 1.53 (brs, 1H,  $\gamma$ -CH<sub>2</sub>), 1.13 (brs, 1H,  $\gamma$ -CH<sub>2</sub>); <sup>13</sup>C NMR (100 MHz, CDCl<sub>3</sub>)  $\delta$  ppm: 173.0, 171.5, 169.4, 160.9, 129.1, 127.5, 113.0, 57.9, 55.5, 48.1, 36.7, 26.3, 24.9, 22.5; HRMS [M + H]<sup>+</sup> calcd. for, C<sub>16</sub>H<sub>22</sub>N<sub>3</sub>O<sub>4</sub>, m/z: 320.1610; found m/z: 320.1605.

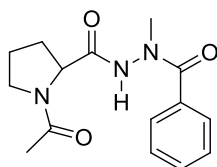

Compound **3**: 1-acetyl-*N'*-benzoyl-*N'*-methylpyrrolidine-2-carbohydrazide.

**Step 3.**  $x'' = 94$   $\mu$ L of Benzoyl chloride [ $y'' = 0.810$  mmol (1.5 eqv.)]. Yield (%): 75 % as a white solid.

<sup>1</sup>H NMR 400 MHz (20 mM, CDCl<sub>3</sub>)  $\delta$  ppm [t-t-c rotamer: ~100 %]: 9.65 (s, 1H, NH), 7.40-7.29 (m, 5H, Ph), 4.36 (brs, 1H,  $\alpha$ -CH), 3.27 (s, 3H, NCH<sub>3</sub>), 3.15 (brs, 1H,  $\delta$ -CH<sub>2</sub>), 2.92 (brs, 1H,  $\delta$ -CH<sub>2</sub>), 2.35 (brs, 1H,  $\beta$ -CH<sub>2</sub>), 1.99 [s, 3H, C(O)-CH<sub>3</sub>], 1.99 [brs, 1H,  $\beta$ -CH<sub>2</sub>], 1.63-1.62 (m, 2H,  $\gamma$ -CH<sub>2</sub>); <sup>1</sup>H NMR 400 MHz [20 mM, (CD<sub>3</sub>)<sub>2</sub>SO]  $\delta$  ppm [t-t-c rotamer: 69 %]: 10.49-10.28 (brs, 1H, NH), 7.44-7.38 (m, 5H, Ph), 4.00 (brs, 1H,  $\alpha$ -CH), 3.38-3.19 (m, 2H,  $\delta$ -CH<sub>2</sub>), 3.06 (s, 3H, NCH<sub>3</sub>), 1.93 [s, 3H, C(O)-CH<sub>3</sub>], 1.59-1.30 (m, 4H,  $\beta$ ,  $\gamma$ -CH<sub>2</sub>); [c-t-c rotamer: 31 %]: 10.72 (s, 1H, NH), 7.44-7.38 (m, 5H, Ph), 4.14 (brd,  $J = 8.0$  Hz, 1H,  $\alpha$ -CH), 3.38-3.19 (m, 2H,  $\delta$ -CH<sub>2</sub>), 3.09 (s, 3H, NCH<sub>3</sub>), 1.59-1.30 (m, 4H,  $\beta$ ,  $\gamma$ -CH<sub>2</sub>), 1.35 [s, 3H, C(O)-CH<sub>3</sub>]; <sup>1</sup>H NMR 400 MHz (20 mM, D<sub>2</sub>O)  $\delta$  ppm [t-t-c rotamer: 77 %]: 7.57-7.41 (m, 5H, Ph), 4.18 (brs, 1H,  $\alpha$ -CH), 3.48 (t, 2H,  $J = 8.0$  Hz,  $\delta$ -CH<sub>2</sub>), 3.26 (brs, 3H, NCH<sub>3</sub>), 2.07 [s, 3H, C(O)-CH<sub>3</sub>], 1.80-1.73 (m, 2H,  $\beta$ -CH<sub>2</sub>), 1.52-1.30 (m, 1H,  $\gamma$ -CH<sub>2</sub>), 1.02 (brs, 1H,  $\gamma$ -CH<sub>2</sub>); [c-t-c rotamer: 23

%]: 7.57-7.41 (m, 5H, Ph), 4.37 (dd,  $J = 8.0$  Hz,  $J = 4.0$  Hz, 1H,  $\alpha$ -CH), 3.40-3.34 (m, 2H,  $\delta$ -CH<sub>2</sub>), 3.29 (brs, 3H, NCH<sub>3</sub>), 2.16 [s, 3H, C(O)-CH<sub>3</sub>], 1.85 (brs, 2H,  $\beta$ -CH<sub>2</sub>), 1.52-1.30 (m, 1H,  $\gamma$ -CH<sub>2</sub>), 1.02 (brs, 1H,  $\gamma$ -CH<sub>2</sub>); <sup>13</sup>C NMR (150 MHz, CDCl<sub>3</sub>)  $\delta$  ppm [t-t-c rotamer: ~100 %]: 173.5, 171.4, 169.3, 135.7, 129.6, 127.7, 126.8, 57.8, 47.9, 36.2, 26.2, 24.7, 22.5; HRMS [M + H]<sup>+</sup> calcd. for, C<sub>15</sub>H<sub>20</sub>N<sub>3</sub>O<sub>3</sub>, m/z: 290.1505; found m/z: 290.1500.

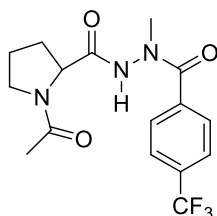

**Compound 4:** 1-acetyl-*N'*-methyl-*N'*-[4-(trifluoromethyl) benzoyl] pyrrolidine-2-carbohydrazide.

**Step 3.**  $x'' = 120$   $\mu$ L of 4-(trifluoromethyl)benzoyl chloride [ $y'' = 0.810$  mmol (1.5 eqv.)]. Yield (%): 80 % as a white solid.

<sup>1</sup>H NMR 400 MHz (20 mM, CDCl<sub>3</sub>)  $\delta$  ppm [t-t-c rotamer: ~100 %]: 9.78 (s, 1H, NH), 7.58 (d, 2H,  $J = 8.0$  Hz, Ph-CF<sub>3</sub>), 7.51 (d, 2H,  $J = 8.0$  Hz, Ph-CF<sub>3</sub>), 4.34 (brd,  $J = 4.0$  Hz, 1H,  $\alpha$ -CH), 3.28 (s, 3H, NCH<sub>3</sub>), 3.16-3.12 (m, 1H,  $\delta$ -CH<sub>2</sub>), 2.85 (brs, 1H,  $\delta$ -CH<sub>2</sub>), 2.40-2.38 (m, 1H,  $\beta$ -CH<sub>2</sub>), 1.86 [s, 3H, C(O)-CH<sub>3</sub>], 1.86 [brs, 1H,  $\beta$ -CH<sub>2</sub>], 1.64-1.61 (m, 2H,  $\gamma$ -CH<sub>2</sub>); <sup>19</sup>F NMR 564 MHz (20 mM, CDCl<sub>3</sub>)  $\delta$  ppm [t-t-c rotamer: ~100 %]: -62.6 (s, 3F, PhCF<sub>3</sub>); <sup>1</sup>H NMR 400 MHz [20 mM, (CD<sub>3</sub>)<sub>2</sub>SO]  $\delta$  ppm [t-t-c rotamer: 70 %]: 10.44 (brd,  $J = 128$  Hz, 1H, NH), 7.76 (d, 2H,  $J = 8.0$  Hz, Ph-CF<sub>3</sub>), 7.56 (d, 2H,  $J = 8.0$  Hz, Ph-CF<sub>3</sub>), 4.00 (brs, 1H,  $\alpha$ -CH), 3.32-3.19 (m, 2H,  $\delta$ -CH<sub>2</sub>), 3.08 (s, 3H, NCH<sub>3</sub>), 1.92 [s, 3H, C(O)-CH<sub>3</sub>], 1.59-1.10 (m, 4H,  $\beta$ ,  $\gamma$ -CH<sub>2</sub>); [c-t-c rotamer: 30 %]: 10.79 (s, 1H, NH), 7.76 (d, 2H,  $J = 8.0$  Hz, Ph-CF<sub>3</sub>), 7.59 (d, 2H,  $J = 8.0$  Hz, Ph-CF<sub>3</sub>), 4.15 (brd,  $J = 8.0$  Hz, 1H,  $\alpha$ -CH), 3.32-3.19 (m, 2H,  $\delta$ -CH<sub>2</sub>), 3.11 (s, 3H, NCH<sub>3</sub>), 1.59-1.10 (m, 4H,  $\beta$ ,  $\gamma$ -CH<sub>2</sub>), 1.34 [s, 3H, C(O)-CH<sub>3</sub>]; <sup>19</sup>F NMR 564 MHz [20 mM, (CD<sub>3</sub>)<sub>2</sub>SO]  $\delta$  ppm [t-t-c rotamer: 70 %]: -61.3 (s, 3F, PhCF<sub>3</sub>); [c-t-c rotamer: 30 %]: -61.4 (s, 3F, PhCF<sub>3</sub>); <sup>1</sup>H NMR 400 MHz (20 mM, D<sub>2</sub>O)  $\delta$  ppm [t-t-c rotamer: 79 %]: 7.82 (d, 2H,  $J = 8.0$  Hz, PhCF<sub>3</sub>), 7.58 (d, 2H,  $J = 8.0$  Hz, PhCF<sub>3</sub>), 4.18 (brs, 1H,  $\alpha$ -CH), 3.47 (t, 2H,  $J = 8.0$  Hz,  $\delta$ -CH<sub>2</sub>), 3.27 (brs, 3H, NCH<sub>3</sub>), 2.05 [s, 3H, C(O)-CH<sub>3</sub>], 1.79-1.71 (m, 1H,  $\beta$ -CH<sub>2</sub>), 1.52 (brs, 1H,  $\beta$ -CH<sub>2</sub>), 1.37-1.25 (m, 1H,  $\gamma$ -CH<sub>2</sub>), 0.83 (brs, 1H,  $\gamma$ -CH<sub>2</sub>); [c-t-c rotamer: 21 %]: 7.82 (d, 2H,  $J = 8.0$  Hz, PhCF<sub>3</sub>), 7.61 (d, 2H,  $J = 8.0$  Hz, PhCF<sub>3</sub>), 4.36 (d,  $J = 8.0$  Hz, 1H,  $\alpha$ -CH), 3.38-3.32 (m, 2H,  $\delta$ -CH<sub>2</sub>), 3.30 (s, 3H, NCH<sub>3</sub>), 2.16 [s, 3H, C(O)-CH<sub>3</sub>], 1.79-1.71 (m, 1H,  $\beta$ -CH<sub>2</sub>), 1.52 (brs, 1H,  $\beta$ -CH<sub>2</sub>), 1.37-1.25 (m, 1H,  $\gamma$ -CH<sub>2</sub>), 0.83 (brs, 1H,  $\gamma$ -CH<sub>2</sub>); <sup>19</sup>F NMR 564 MHz (20 mM,

D<sub>2</sub>O)  $\delta$  ppm [t-t-c rotamer: 79 %]: -62.8 (s, 3F, PhCF<sub>3</sub>); [c-t-c rotamer: 21 %]: -62.9 (s, 3F, PhCF<sub>3</sub>); <sup>13</sup>C NMR (150 MHz, CDCl<sub>3</sub>)  $\delta$  ppm [t-t-c rotamer: ~100 %]: 172.1, 171.6, 169.2, 139.5, 131.5 (q, <sup>2</sup>J<sub>CF</sub> = 32.0 Hz), 127.3, 124.6 (brs), 123.9 (q, <sup>1</sup>J<sub>CF</sub> = 271.0 Hz), 57.7, 48.1, 36.3, 26.0, 24.9, 22.3; HRMS [M + H]<sup>+</sup> calcd. for, C<sub>16</sub>H<sub>19</sub>F<sub>3</sub>N<sub>3</sub>O<sub>3</sub>, m/z: 358.1379; found m/z: 358.1375.

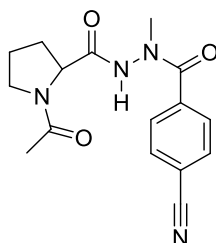

Compound **5**: 1-acetyl-*N'*-(4-cyanobenzoyl)-*N'*-methylpyrrolidine-2-carbohydrazide.

**Step 3.** x'' = 134 mg of 4-cyanobenzoyl chloride [y'' = 0.810 mmol (1.5 eqv.)]. Yield (%): 65 % as a white solid.

<sup>1</sup>H NMR 400 MHz (20 mM, CDCl<sub>3</sub>)  $\delta$  ppm [t-t-c rotamer: ~100 %]: 9.71 (s, 1H, NH), 7.62 (d, 2H, *J* = 8.0 Hz, Ph-CN), 7.52 (d, 2H, *J* = 8.0 Hz, Ph-CN), 4.32 (brs, 1H,  $\alpha$ -CH), 3.26 (s, 3H, NCH<sub>3</sub>), 3.26 (brs, 1H,  $\delta$ -CH<sub>2</sub>), 3.01 (brs, 1H,  $\delta$ -CH<sub>2</sub>), 2.34 (brs, 1H,  $\beta$ -CH<sub>2</sub>), 1.94 [s, 3H, C(O)-CH<sub>3</sub>], 1.94 [brs, 1H,  $\beta$ -CH<sub>2</sub>], 1.75-1.62 (m, 2H,  $\gamma$ -CH<sub>2</sub>); <sup>1</sup>H NMR 400 MHz [20 mM, (CD<sub>3</sub>)<sub>2</sub>SO]  $\delta$  ppm [t-t-c rotamer: 72 %]: 10.44 (brd, *J* = 108 Hz, 1H, NH), 7.87 (d, 2H, *J* = 8.0 Hz, Ph-CN), 7.52 (d, 2H, *J* = 8.0 Hz, Ph-CN), 4.00 (brs, 1H,  $\alpha$ -CH), 3.36-3.18 (m, 2H,  $\delta$ -CH<sub>2</sub>), 3.07 (s, 3H, NCH<sub>3</sub>), 1.93 [s, 3H, C(O)-CH<sub>3</sub>], 1.67-1.30 (m, 4H,  $\beta$ ,  $\gamma$ -CH<sub>2</sub>); [c-t-c rotamer: 28 %]: 10.79 (s, 1H, NH), 7.89 (d, 2H, *J* = 8.0 Hz, Ph-CN), 7.55 (d, 2H, *J* = 8.0 Hz, Ph-CN), 4.17 (brd, *J* = 8.0 Hz, 1H,  $\alpha$ -CH), 3.36-3.18 (m, 2H,  $\delta$ -CH<sub>2</sub>), 3.11 (s, 3H, NCH<sub>3</sub>), 1.67-1.30 (m, 4H,  $\beta$ ,  $\gamma$ -CH<sub>2</sub>), 1.35 [s, 3H, C(O)-CH<sub>3</sub>]; <sup>1</sup>H NMR 400 MHz (20 mM, D<sub>2</sub>O)  $\delta$  ppm [t-t-c rotamer: 80 %]: 7.89 (d, 2H, *J* = 12.0 Hz, PhCN), 7.58 (d, 2H, *J* = 8.0 Hz, PhCN), 4.18 (brs, 1H,  $\alpha$ -CH), 3.51 (t, 2H, *J* = 4.0 Hz,  $\delta$ -CH<sub>2</sub>), 3.27 (brs, 3H, NCH<sub>3</sub>), 2.07 [s, 3H, C(O)-CH<sub>3</sub>], 1.87-1.79 (m, 2H,  $\beta$ -CH<sub>2</sub>), 1.37-1.28 (m, 2H,  $\gamma$ -CH<sub>2</sub>); [c-t-c rotamer: 20 %]: 7.90 (d, 2H, *J* = 8.0 Hz, PhCN), 7.62 (d, 2H, *J* = 8.0 Hz, PhCN), 4.40 (dd, *J* = 8.0 Hz, 1H,  $\alpha$ -CH), 3.41-3.35 (m, 2H,  $\delta$ -CH<sub>2</sub>), 3.30 (s, 3H, NCH<sub>3</sub>), 2.17 [s, 3H, C(O)-CH<sub>3</sub>], 1.64 (m, 2H,  $\beta$ -CH<sub>2</sub>), 0.88 (m, 2H,  $\gamma$ -CH<sub>2</sub>); <sup>13</sup>C NMR (150 MHz, CDCl<sub>3</sub>)  $\delta$  ppm [t-t-c rotamer: ~100 %]: 171.6, 171.3, 169.4, 140.2, 131.5, 127.8, 118.2, 113.4, 57.8, 48.3, 36.3, 26.2, 25.0, 22.5; HRMS [M + H]<sup>+</sup> calcd. for, C<sub>16</sub>H<sub>19</sub>N<sub>4</sub>O<sub>3</sub>, m/z: 315.1457; found m/z: 315.1447.

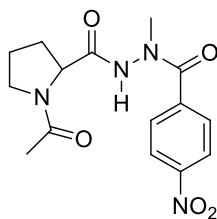

Compound **6**: 1-acetyl-*N'*-methyl-*N'*-(4-nitrobenzoyl)pyrrolidine-2-carbohydrazide.

**Step 3.**  $x'' = 150$  mg of 4-nitrobenzoyl chloride [ $y'' = 0.810$  mmol (1.5 eqv.)]. Yield (%): 72 % as a white solid.

$^1\text{H}$  NMR 400 MHz (20 mM,  $\text{CDCl}_3$ )  $\delta$  ppm [t-t-c rotamer:  $\sim 100$  %]: 9.75 (s, 1H, NH), 8.17 (d, 2H,  $J = 12.0$  Hz, Ph- $\text{NO}_2$ ), 7.59 (d, 2H,  $J = 8.0$  Hz, Ph- $\text{NO}_2$ ), 4.31 (brd,  $J = 8.0$  Hz, 1H,  $\alpha$ -CH), 3.27 (s, 3H,  $\text{NCH}_3$ ), 3.22-3.18 (m, 1H,  $\delta$ - $\text{CH}_2$ ), 2.97 (brs, 1H,  $\delta$ - $\text{CH}_2$ ), 2.34-2.32 (m, 1H,  $\beta$ - $\text{CH}_2$ ), 1.91 [s, 3H,  $\text{C}(\text{O})$ - $\text{CH}_3$ ], 1.91 [brs, 1H,  $\beta$ - $\text{CH}_2$ ], 1.76-1.65 (m, 2H,  $\gamma$ - $\text{CH}_2$ );  $^1\text{H}$  NMR 400 MHz [20 mM,  $(\text{CD}_3)_2\text{SO}$ ]  $\delta$  ppm: [t-t-c rotamer: 74 %]: 10.48 (brd,  $J = 112$  Hz, 1H, NH), 8.24 (d, 2H,  $J = 12.0$  Hz, Ph- $\text{NO}_2$ ), 7.61 (d, 2H,  $J = 12.0$  Hz, Ph- $\text{NO}_2$ ), 3.99 (brs, 1H,  $\alpha$ -CH), 3.42-3.16 (m, 2H,  $\delta$ - $\text{CH}_2$ ), 3.09 (s, 3H,  $\text{NCH}_3$ ), 1.91 [s, 3H,  $\text{C}(\text{O})$ - $\text{CH}_3$ ], 1.65-1.23 (m, 4H,  $\beta$ ,  $\gamma$ - $\text{CH}_2$ ); [c-t-c rotamer: 26 %]: 10.82 (s, 1H, NH), 8.25 (d, 2H,  $J = 8.0$  Hz, Ph- $\text{NO}_2$ ), 7.64 (d, 2H,  $J = 8.0$  Hz, Ph- $\text{NO}_2$ ), 4.17 (dd,  $J = 10.0$  Hz,  $J = 4.0$  Hz, 1H,  $\alpha$ -CH), 3.42-3.16 (m, 2H,  $\delta$ - $\text{CH}_2$ ), 3.12 (s, 3H,  $\text{NCH}_3$ ), 1.65-1.33 (m, 4H,  $\beta$ ,  $\gamma$ - $\text{CH}_2$ ), 1.34 [s, 3H,  $\text{C}(\text{O})$ - $\text{CH}_3$ ];  $^1\text{H}$  NMR 400 MHz (20 mM,  $\text{D}_2\text{O}$ )  $\delta$  ppm: [t-t-c rotamer: 81 %]: 8.36 (d, 2H,  $J = 8.0$  Hz, Ph $\text{NO}_2$ ), 7.67 (d, 2H,  $J = 8.0$  Hz, Ph $\text{NO}_2$ ), 4.19 (brs, 1H,  $\alpha$ -CH), 3.51 (t, 2H,  $J = 4.0$  Hz,  $\delta$ - $\text{CH}_2$ ), 3.30 (brs, 3H,  $\text{NCH}_3$ ), 2.07 [s, 3H,  $\text{C}(\text{O})$ - $\text{CH}_3$ ], 1.91-1.78 (m, 2H,  $\beta$ - $\text{CH}_2$ ), 1.63-1.32 (m, 2H,  $\gamma$ - $\text{CH}_2$ ); [c-t-c rotamer: 19 %]: 8.37 (d, 2H,  $J = 4.0$  Hz, Ph $\text{NO}_2$ ), 7.71 (d, 2H,  $J = 12.0$  Hz, Ph $\text{NO}_2$ ), 4.41 (dd,  $J = 8.0$  Hz,  $J = 4.0$  Hz, 1H,  $\alpha$ -CH), 3.41-3.35 (m, 2H,  $\delta$ - $\text{CH}_2$ ), 3.33 (s, 3H,  $\text{NCH}_3$ ), 2.18 [s, 3H,  $\text{C}(\text{O})$ - $\text{CH}_3$ ], 1.91-1.78 (m, 2H,  $\beta$ - $\text{CH}_2$ ), 1.09 (m, 2H,  $\gamma$ - $\text{CH}_2$ );  $^{13}\text{C}$  NMR (100 MHz,  $\text{CDCl}_3$ )  $\delta$  ppm [t-t-c rotamer:  $\sim 100$  %]: 171.6, 171.1, 169.5, 148.5, 141.9, 128.2, 122.9, 57.8, 48.3, 36.3, 26.2, 25.0, 22.4; HRMS [ $\text{M} + \text{H}$ ] $^+$  calcd. for,  $\text{C}_{15}\text{H}_{19}\text{N}_4\text{O}_5$ ,  $m/z$ : 335.1355; found  $m/z$ : 335.1347.





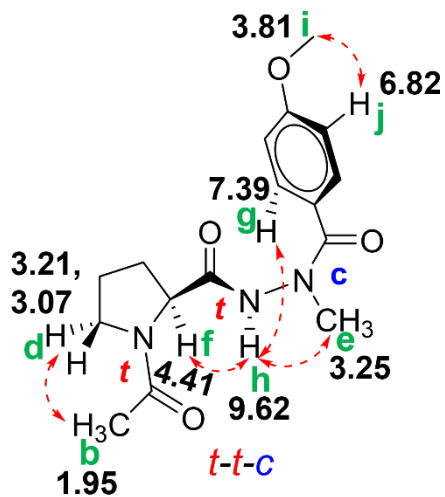

Compound 2

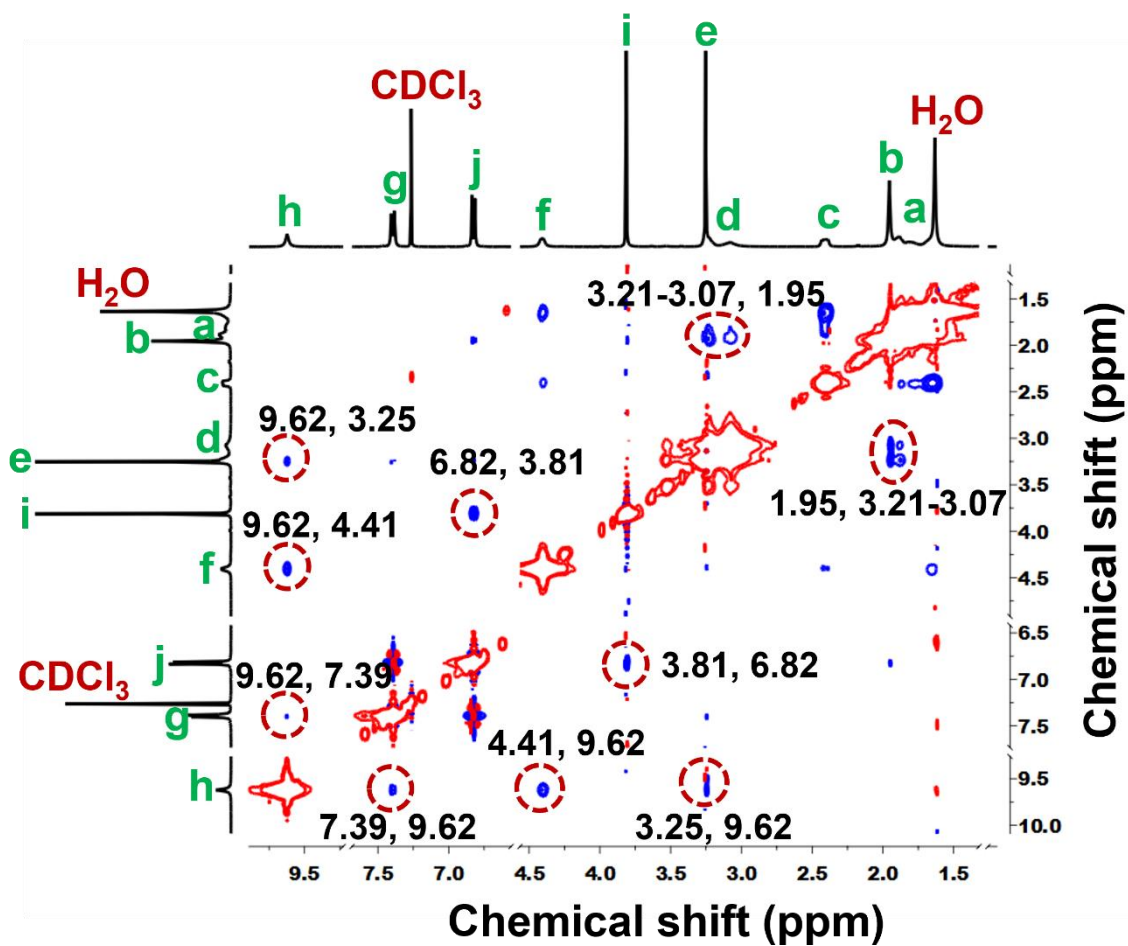

**Figure S3.** 2D-NOESY Spectrum of 2 [1-acetyl-*N'*-[4-methoxybenzoyl]-*N'*-methyl pyrrolidine-2-carbohydrazide] in  $\text{CDCl}_3$ .

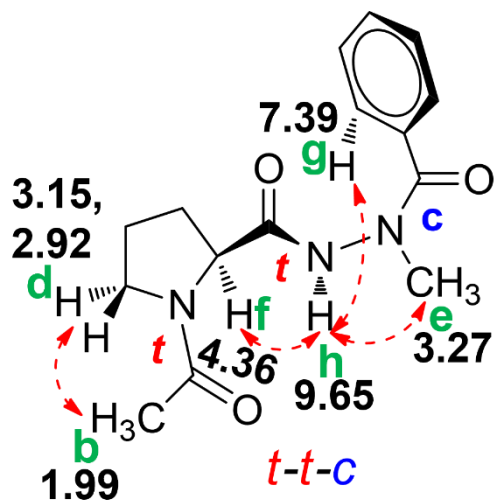

Compound 3

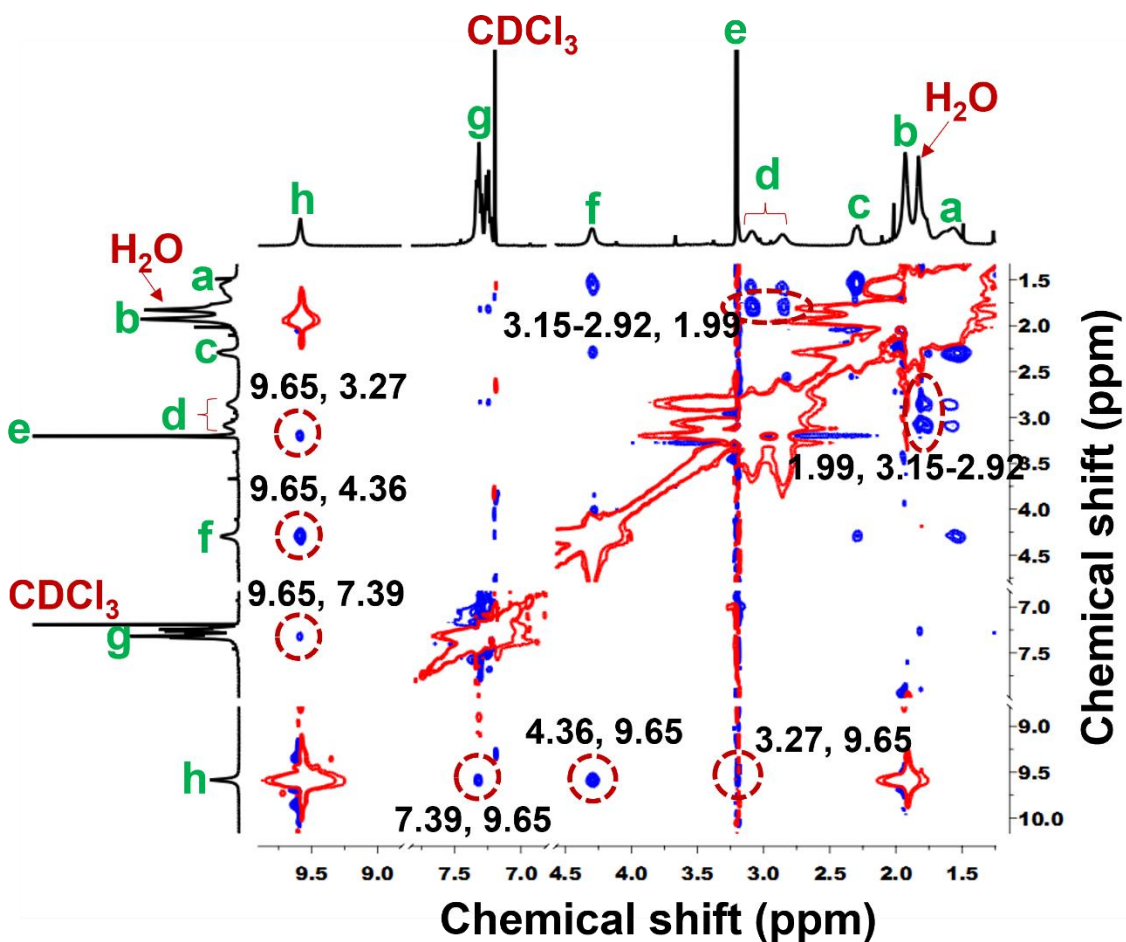

**Figure S4.** 2D-NOESY Spectrum of 3 [1-acetyl-*N'*-benzoyl-*N'*-methylpyrrolidine-2-carbohydrazide] in CDCl<sub>3</sub>.

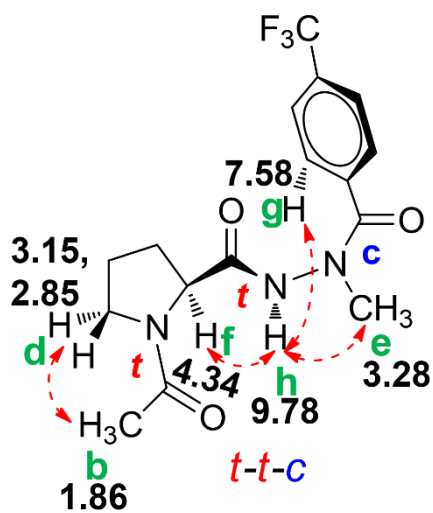

Compound 4

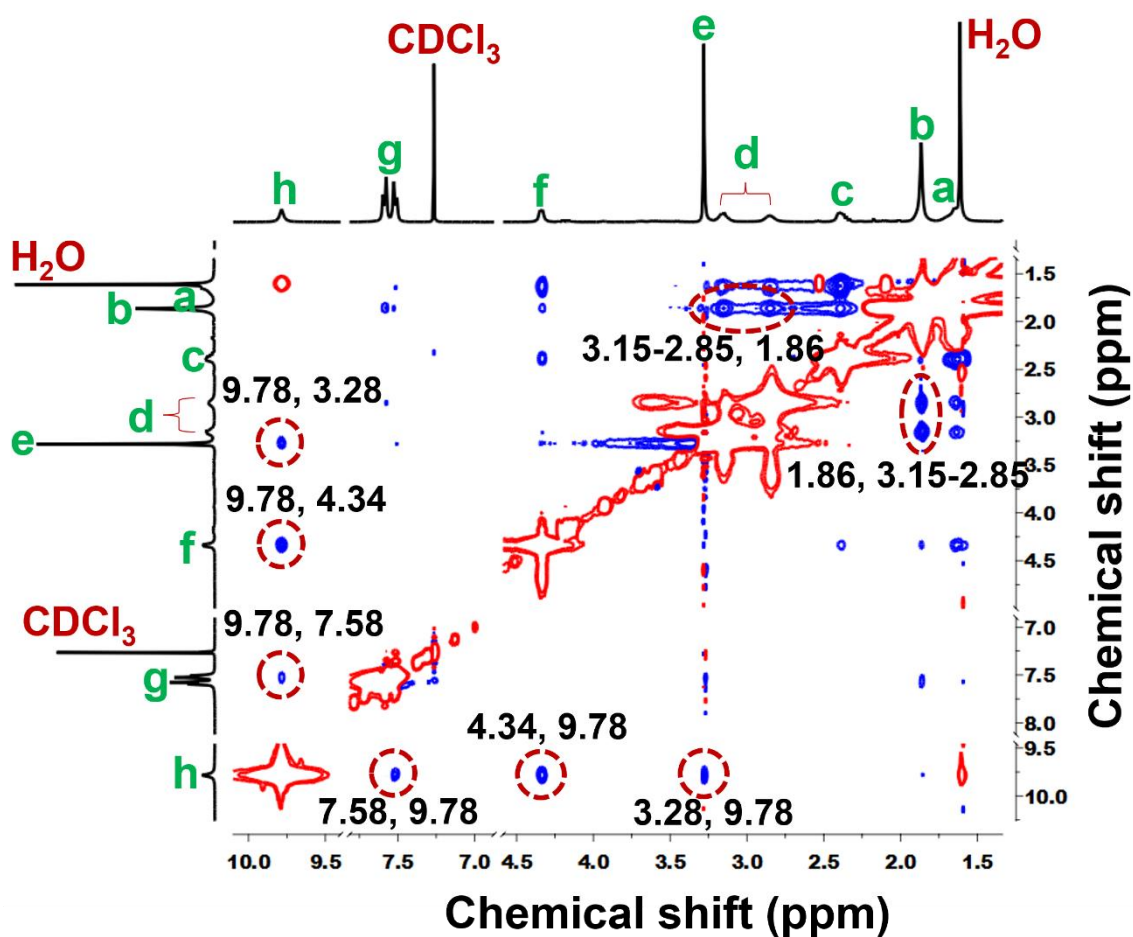

**Figure S5.** 2D-NOESY Spectrum of 4 [1-acetyl-*N'*-methyl-*N'*-[4-(trifluoromethyl)benzoyl]pyrrolidine-2-carbohydrazide] in  $\text{CDCl}_3$ .

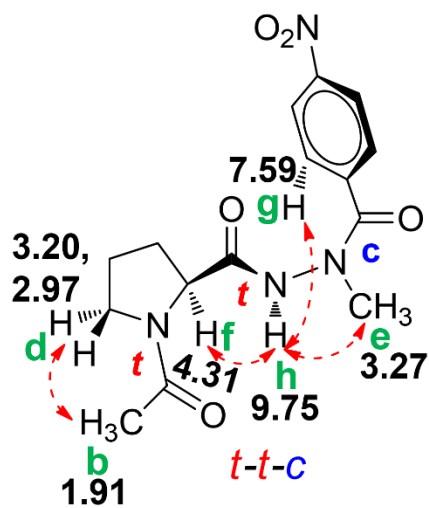

Compound 6

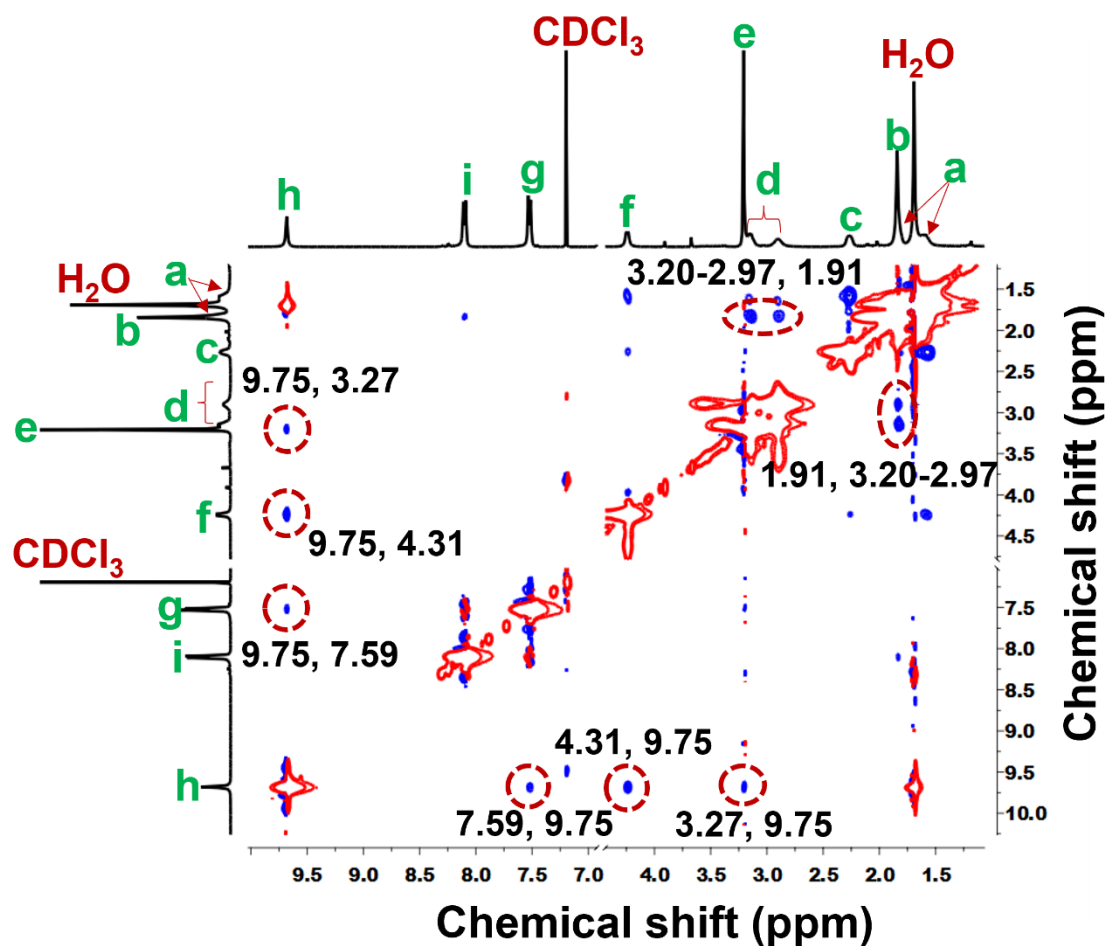

**Figure S6.** 2D-NOESY Spectrum of **6** [1-acetyl-*N'*-methyl-*N'*-(4-nitrobenzoyl)pyrrolidine-2-carbohydrazide] in CDCl<sub>3</sub>.

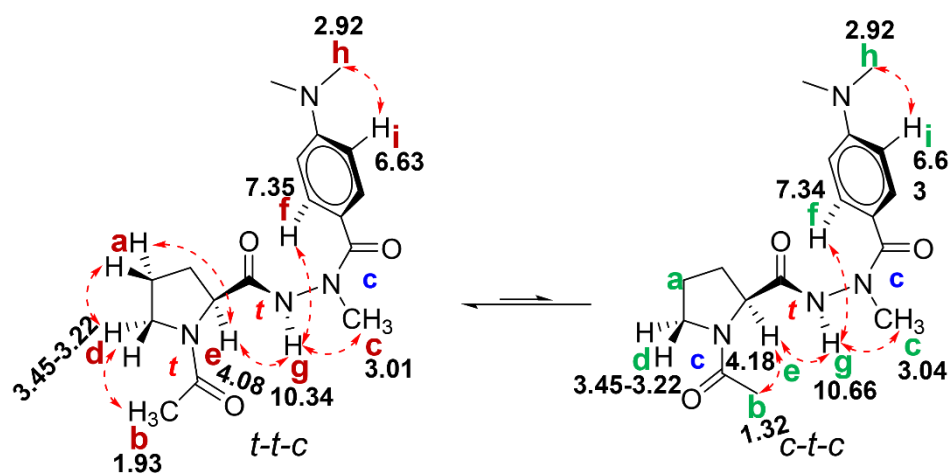

Compound 1

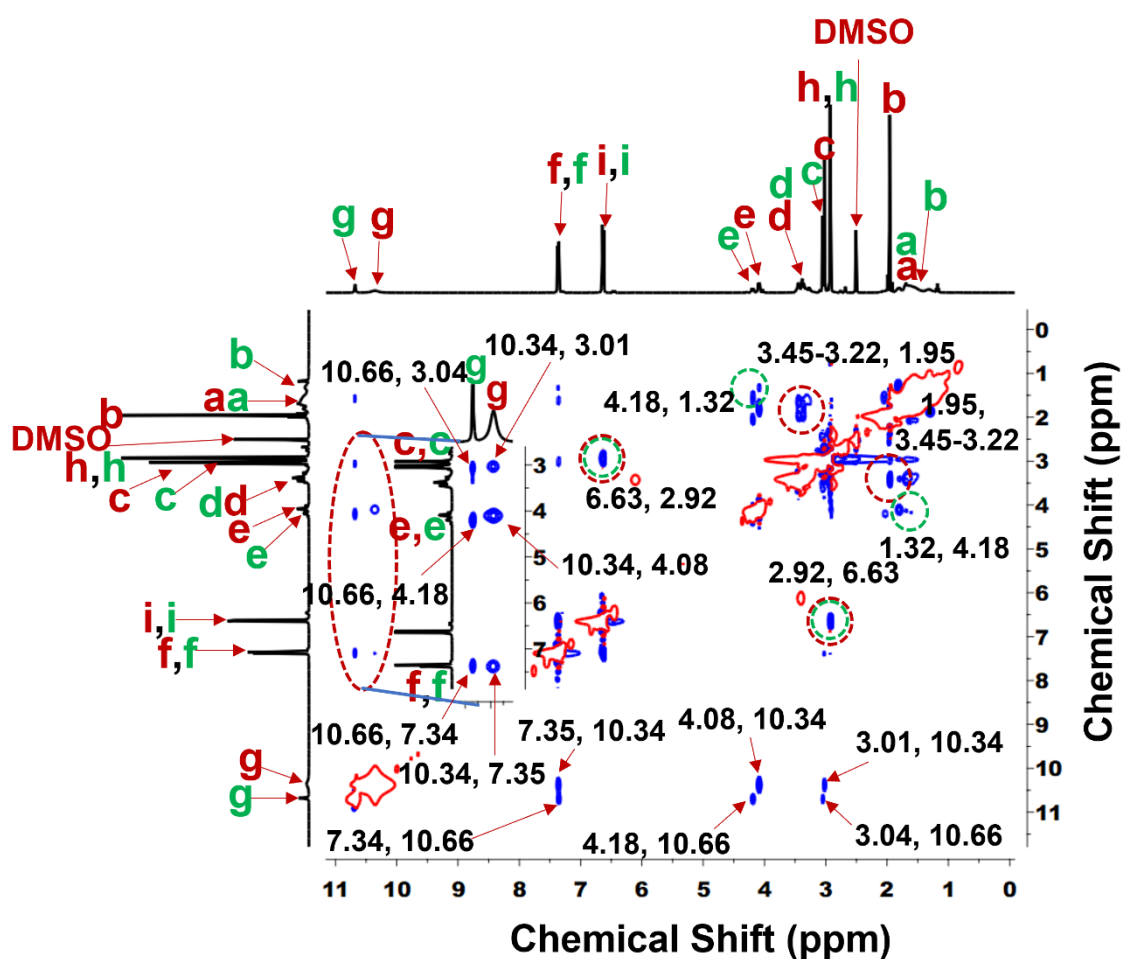

**Figure S7.** 2D-NOESY Spectrum of **1** [1-acetyl-*N'*-[4-(dimethylamino)benzoyl]-*N'*-methylpyrrolidine-2-carbohydrazide] in  $[\text{CD}_3]_2\text{SO}$ .

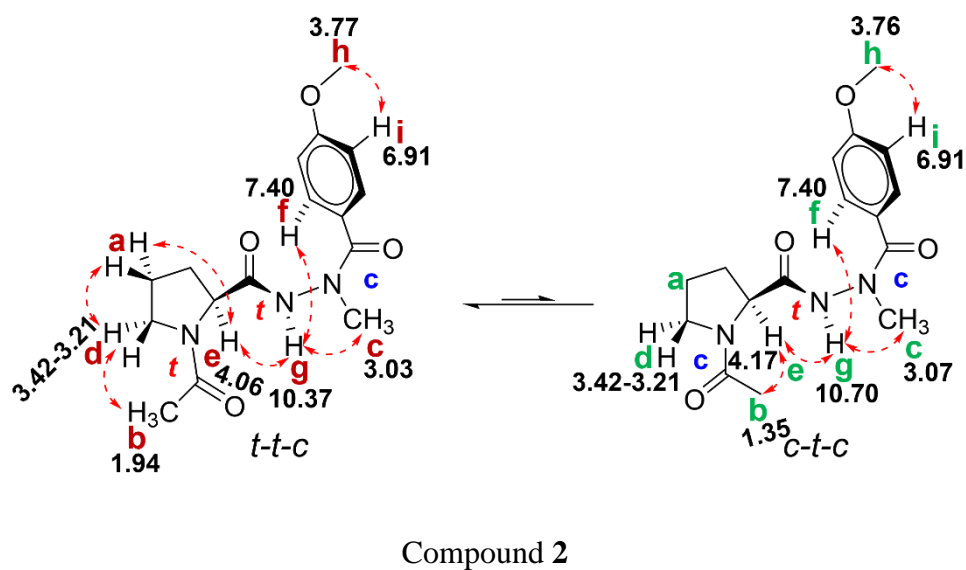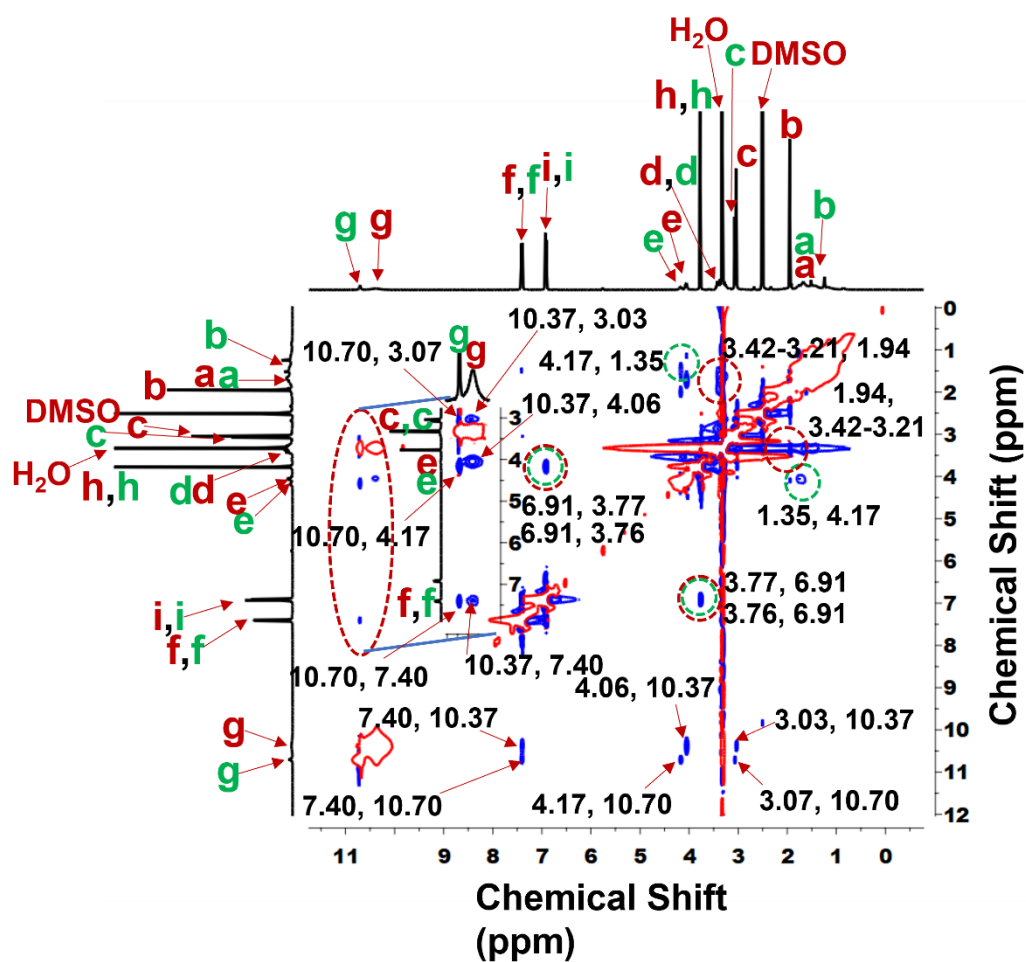

**Figure S8.** 2D-NOESY Spectrum of **2** [1-acetyl-*N*'-[4-methoxybenzoyl]-*N*'-methylpyrrolidine-2-carbohydrazide] in [CD<sub>3</sub>]<sub>2</sub>SO.

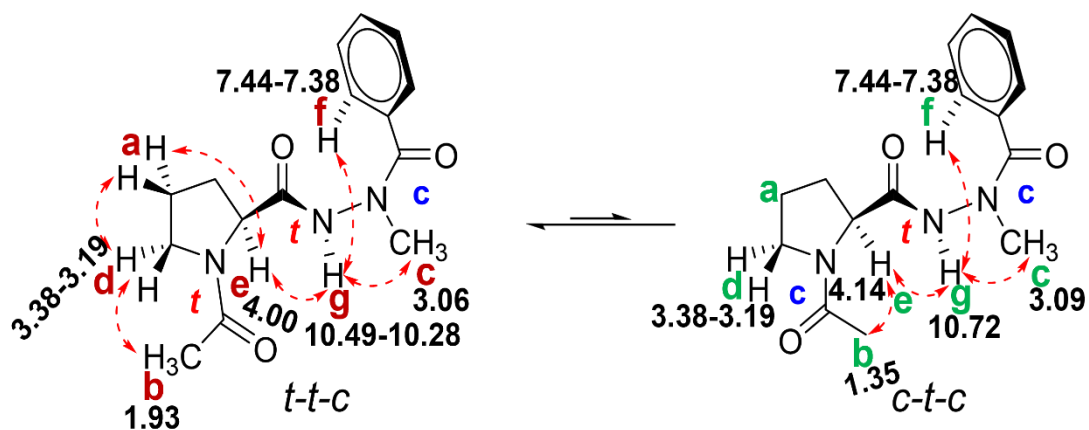

Compound 3

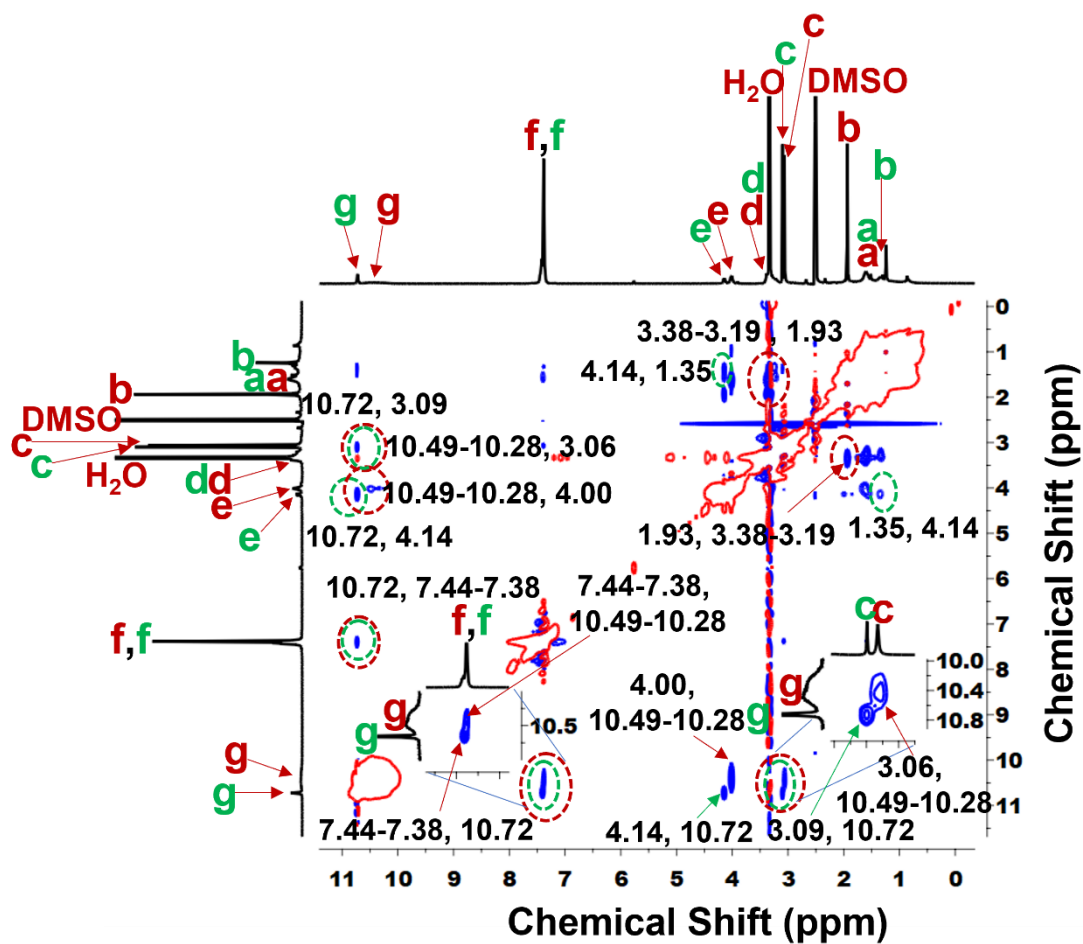

**Figure S9.** 2D-NOESY Spectrum of 3 [1-acetyl-*N'*-benzoyl-*N'*-methylpyrrolidine-2-carbohydrazide] in [CD<sub>3</sub>]<sub>2</sub>SO.



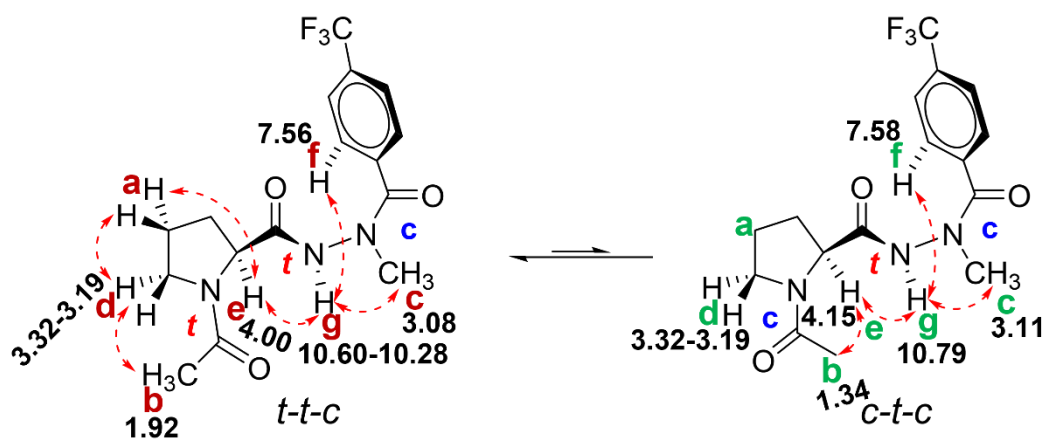

Compound 4

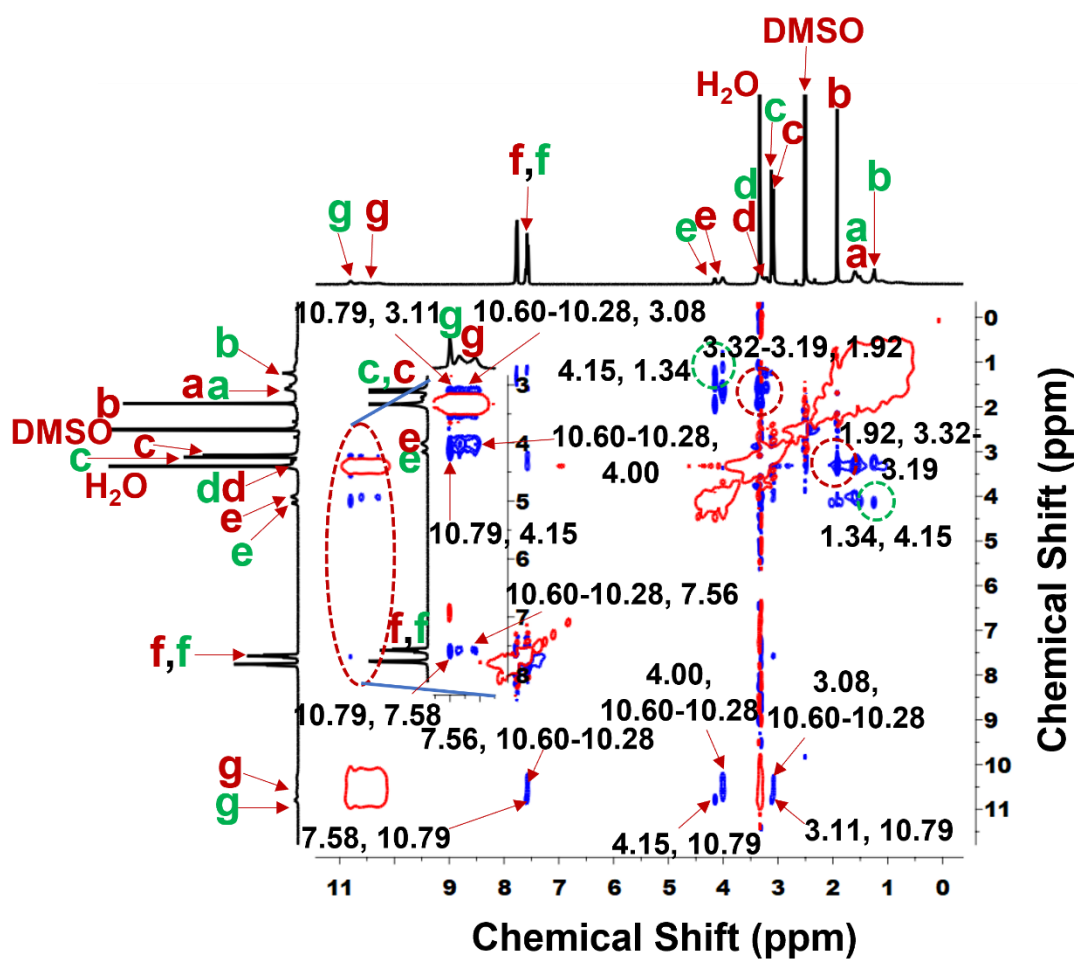

**Figure S10.** 2D-NOESY Spectrum of 4 [1-acetyl-*N'*-methyl-*N'*-[4-(trifluoromethyl)benzoyl]pyrrolidine-2-carbohydrazide] in  $[\text{CD}_3]_2\text{SO}$ .





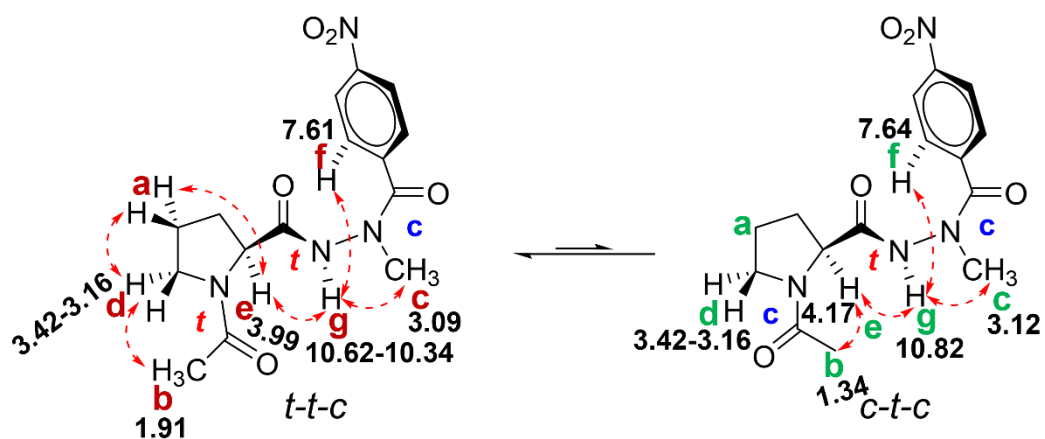

Compound 6

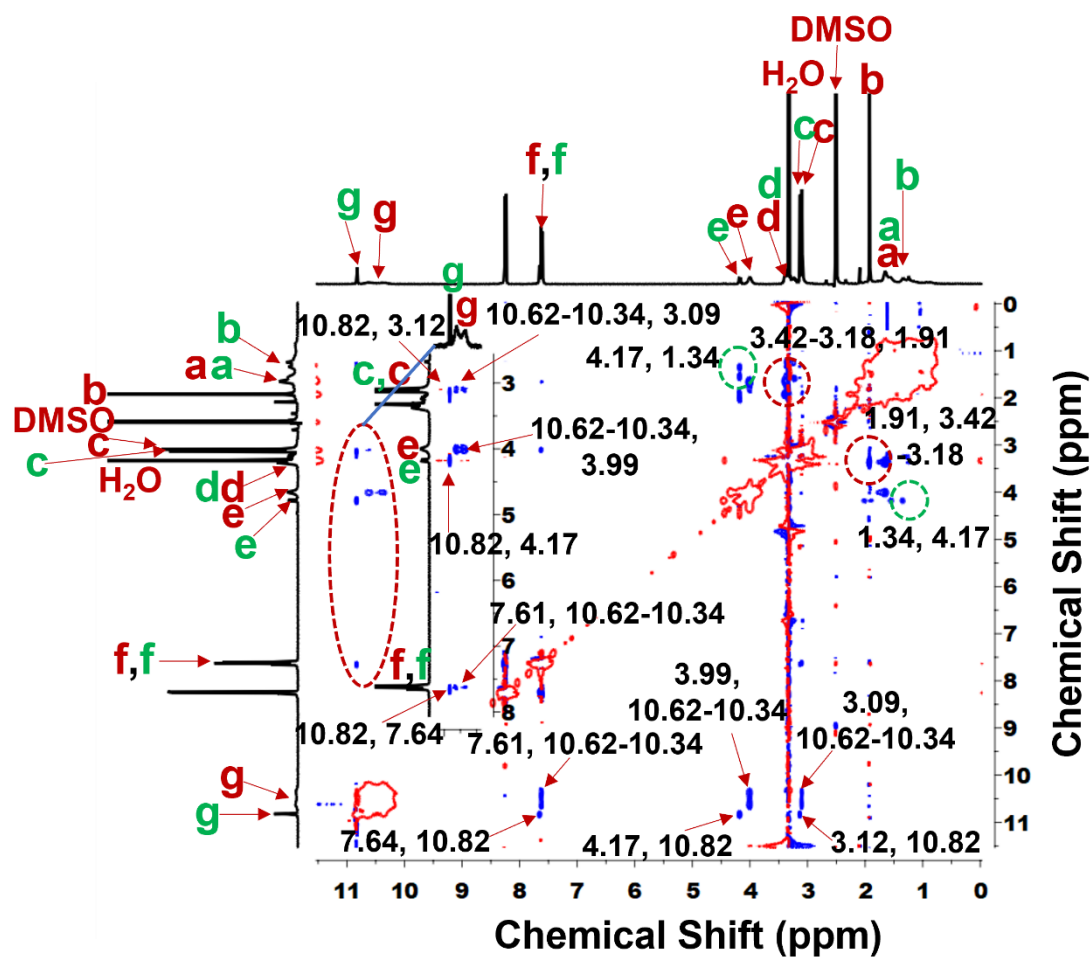

**Figure S12.** 2D-NOESY Spectrum of 6 [1-acetyl-*N'*-methyl-*N'*-(4-nitrobenzoyl)pyrrolidine-2-carbohydrazide] in  $[\text{CD}_3]_2\text{SO}$ .

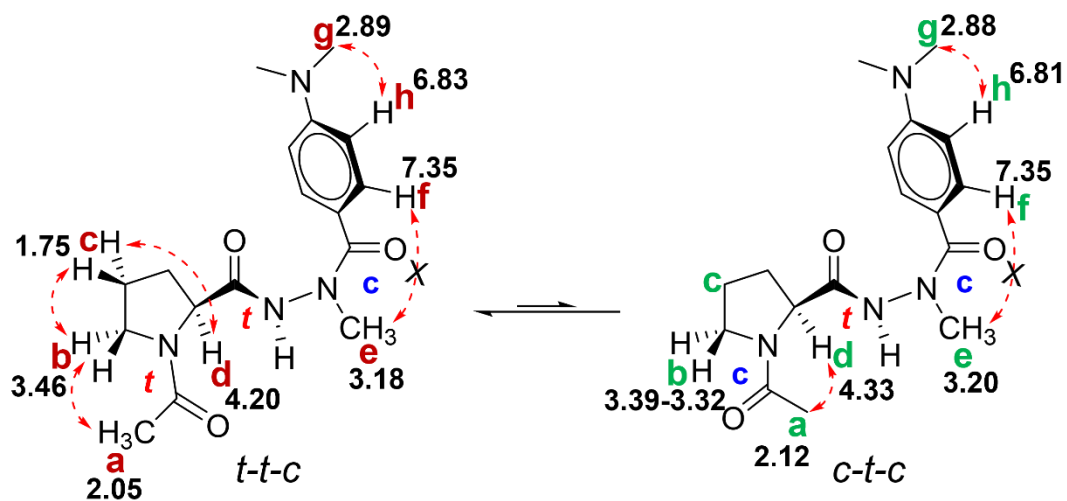

Compound 1

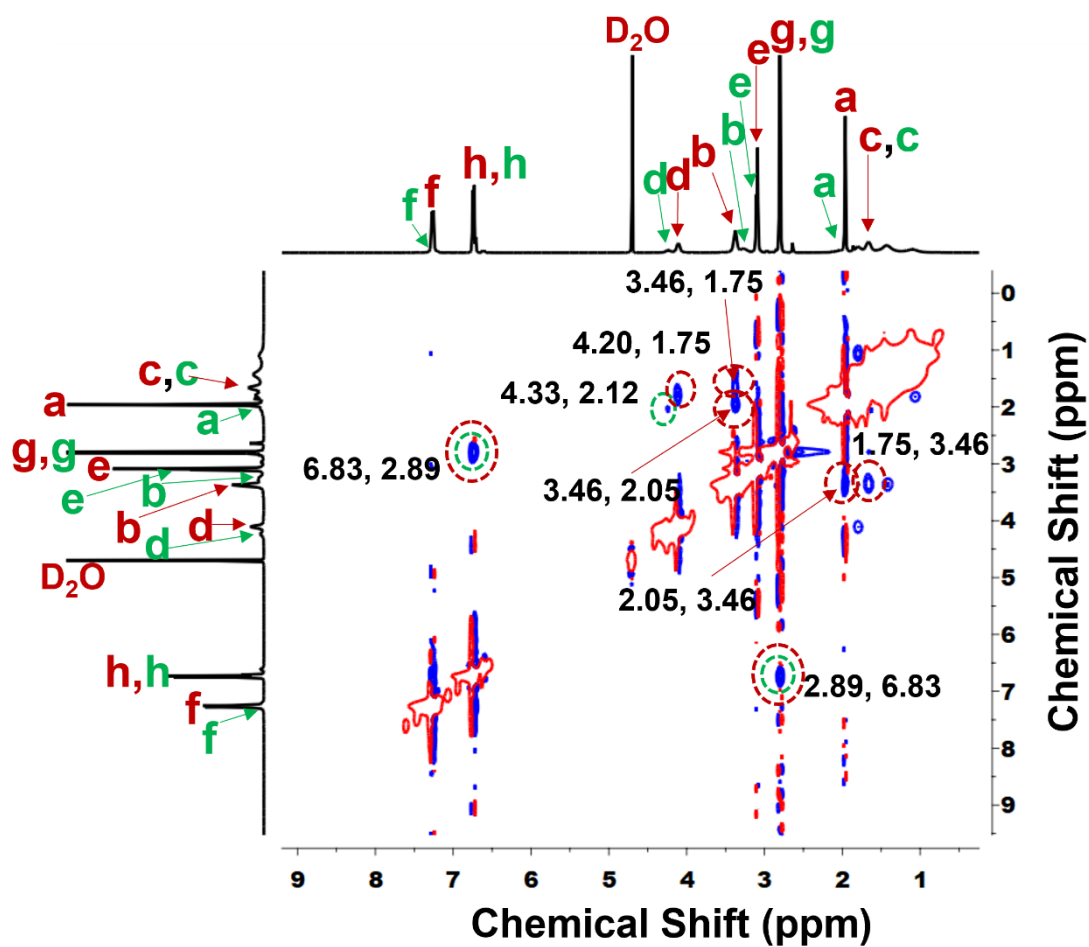

**Figure S13.** 2D-NOESY Spectrum of **1** [1-acetyl-*N'*-[4-(dimethylamino)benzoyl]-*N'*-methyl pyrrolidine-2-carbohydrazide] in D<sub>2</sub>O.

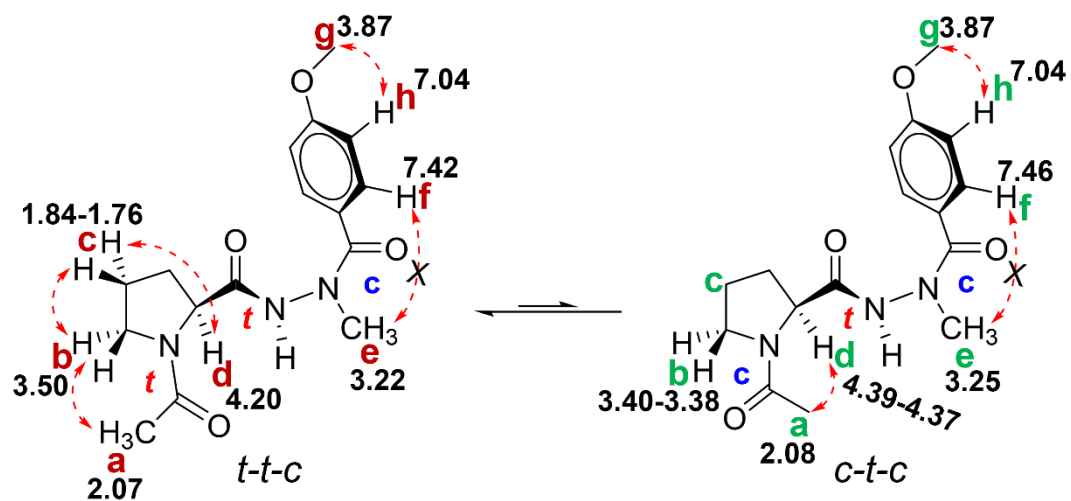

Compound 2

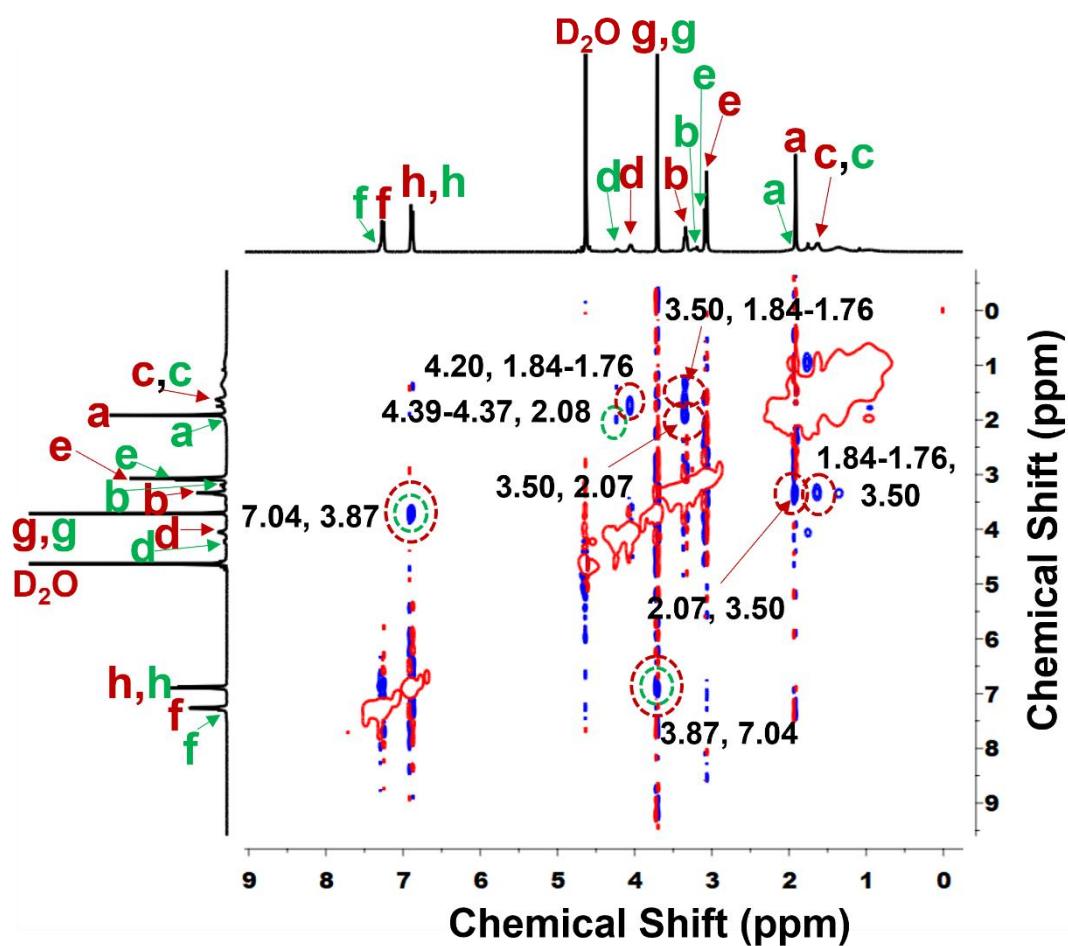

**Figure S14.** 2D-NOESY Spectrum of 2 [1-acetyl-*N'*-[4-methoxybenzoyl]-*N'*-methyl pyrrolidine-2-carbohydrazide] in  $D_2O$ .

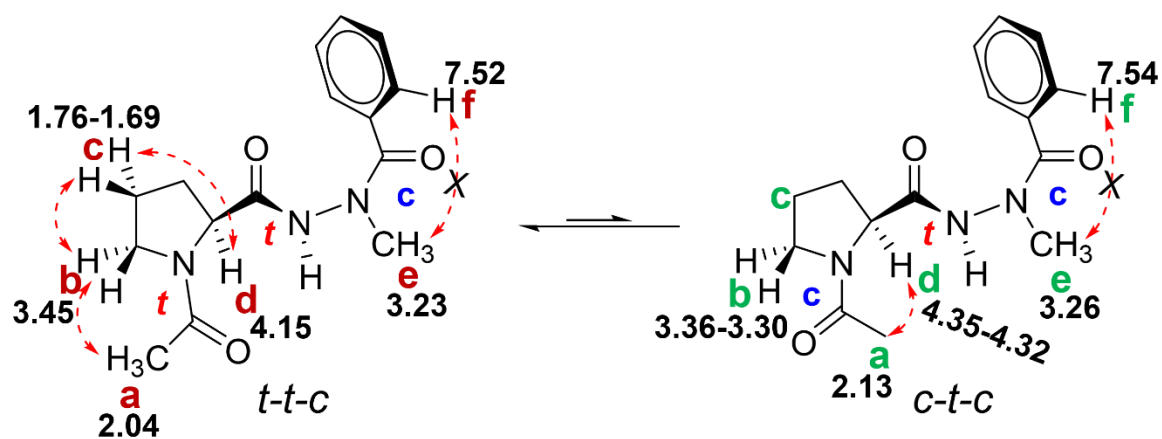

Compound 3

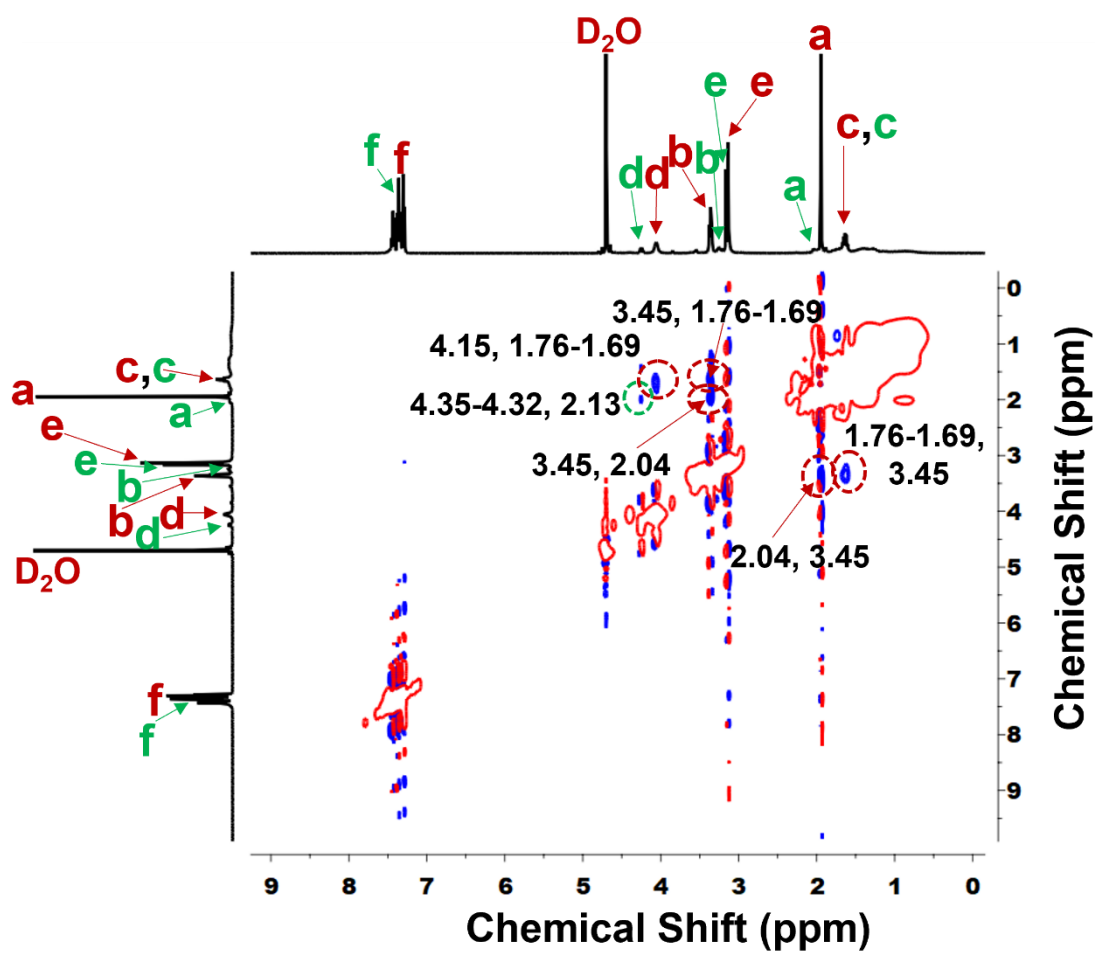

**Figure S15.** 2D-NOESY Spectrum of **3** [1-acetyl-*N'*-benzoyl-*N'*-methylpyrrolidine-2-carbohydrazide] in  $D_2O$ .

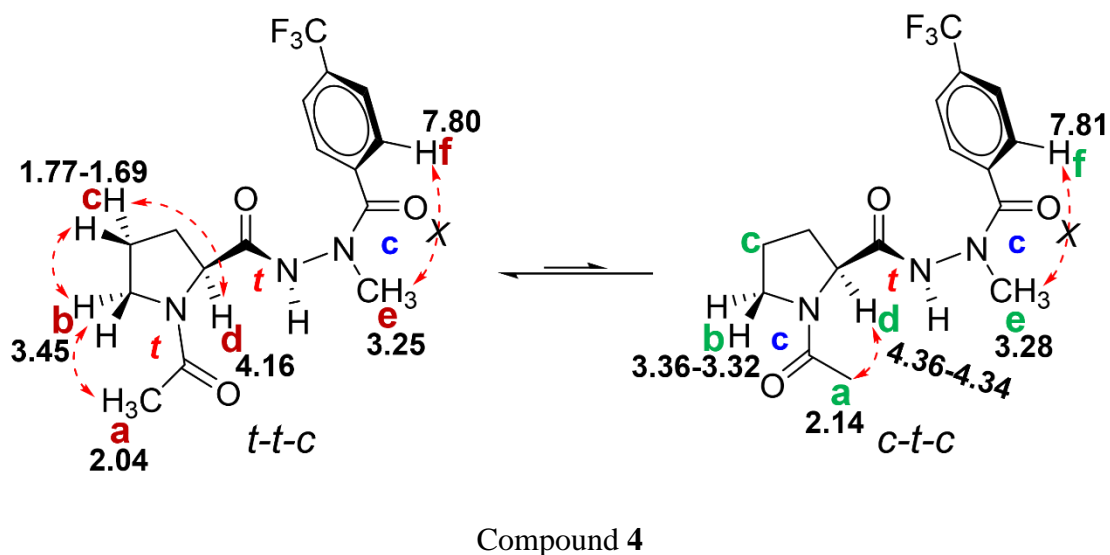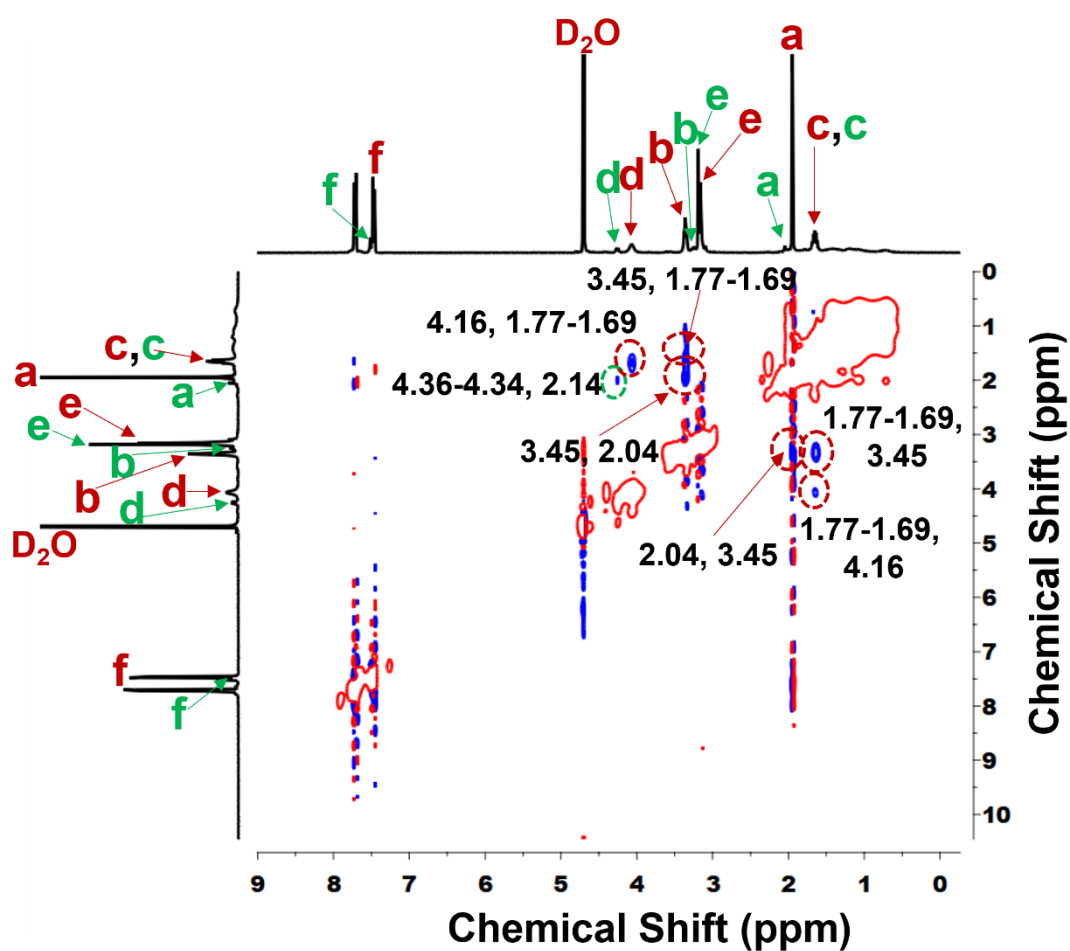

**Figure S16.** 2D-NOESY Spectrum of **4** [1-acetyl-*N'*-methyl-*N'*-[4-(trifluoromethyl)benzoyl]pyrrolidine-2-carbohydrazide] in D<sub>2</sub>O.

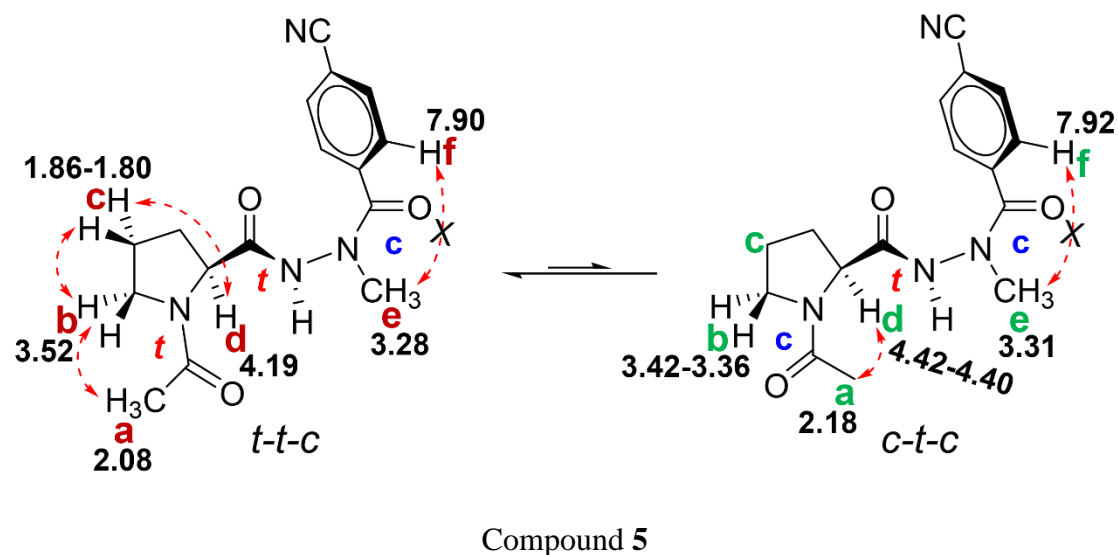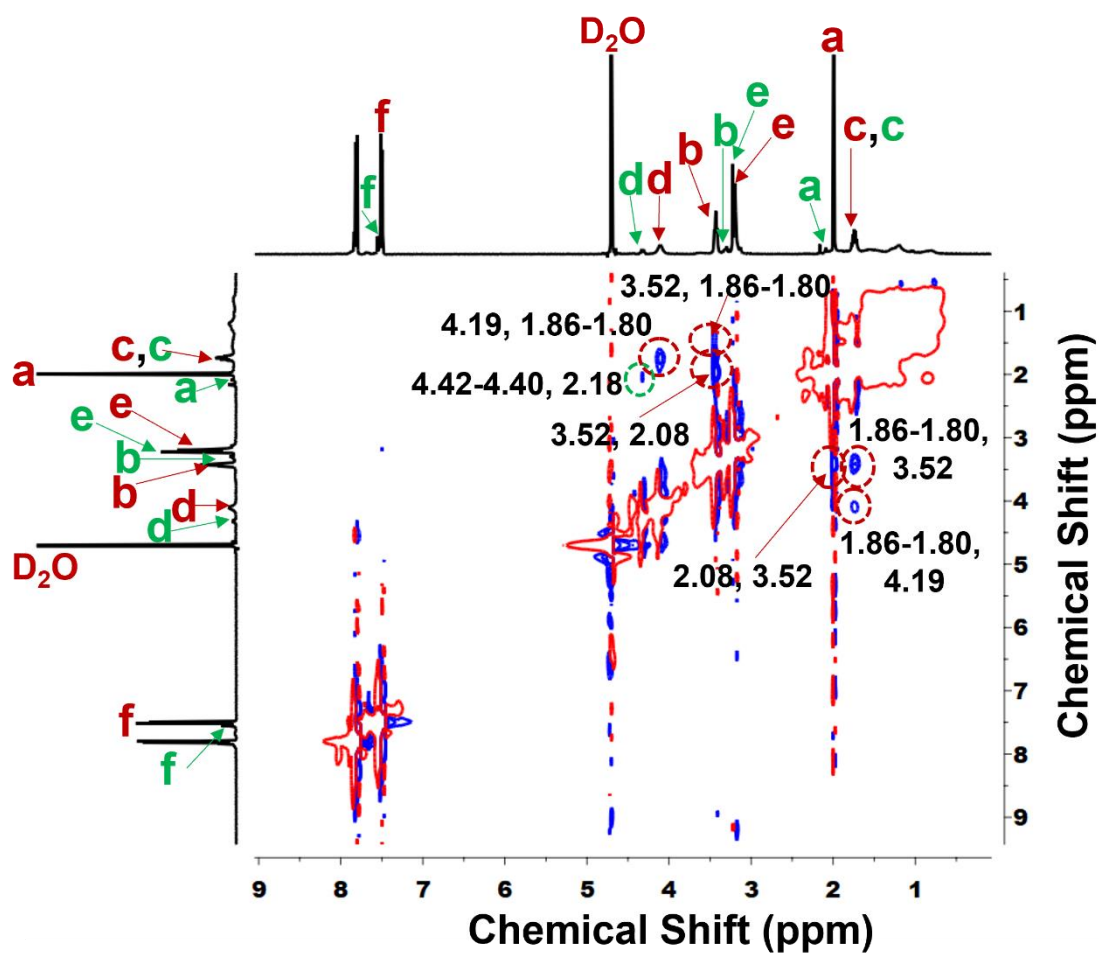

**Figure S17.** 2D-NOESY Spectrum of **5** [1-acetyl-*N'*-(4-cyanobenzoyl)-*N'*-methyl pyrrolidine-2-carbohydrazide] in D<sub>2</sub>O.

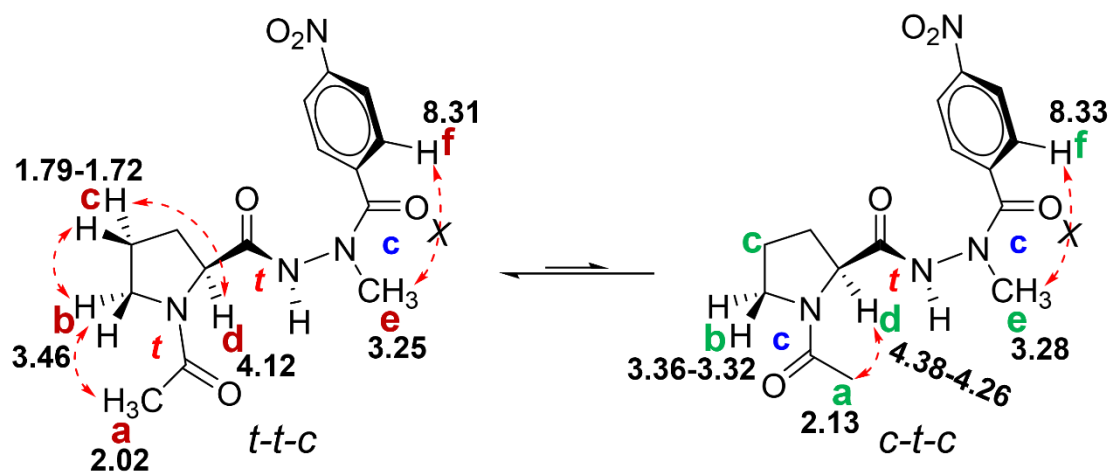

Compound 6

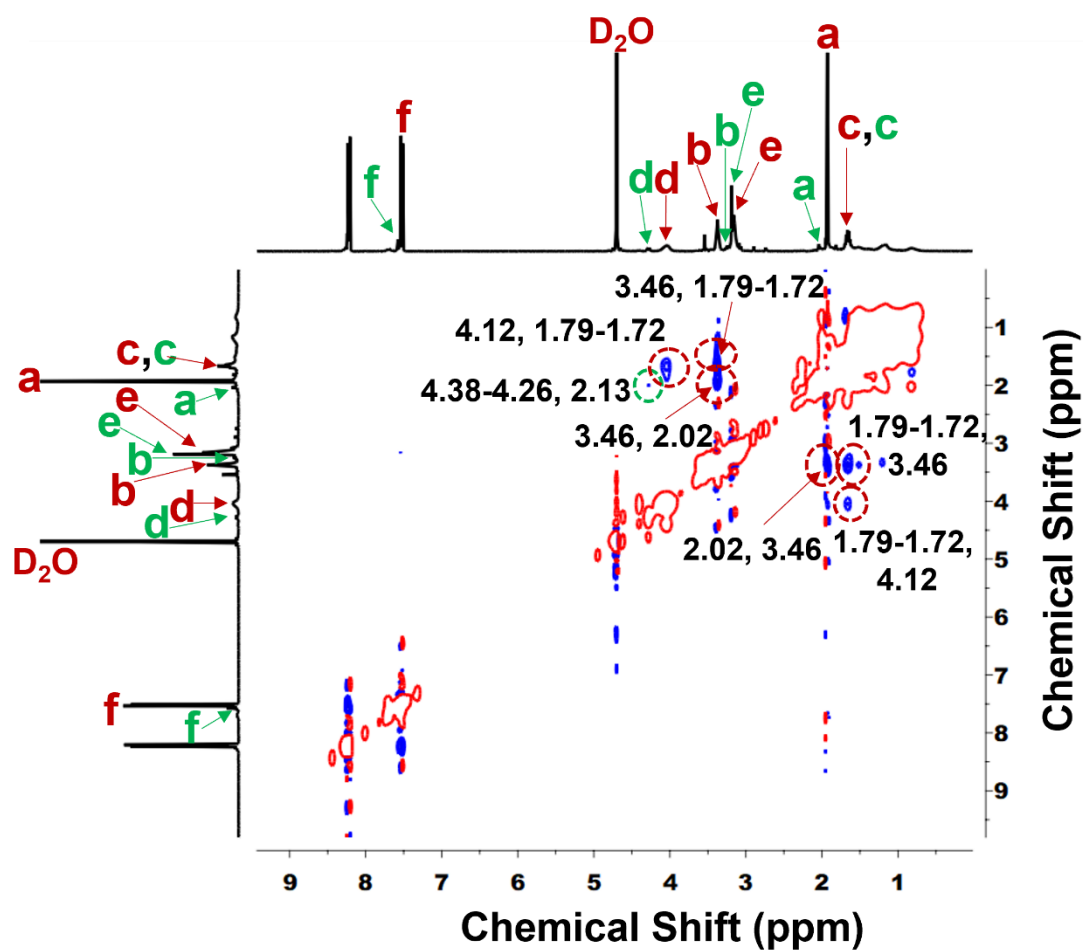

**Figure S18.** 2D-NOESY Spectrum of **6** [1-acetyl-*N'*-methyl-*N'*-(4-nitrobenzoyl)pyrrolidine-2-carbohydrazide] in  $D_2O$ .



10.  $^1\text{H}$ ,  $^{13}\text{C}$  and  $^{19}\text{F}$  NMR spectra of all reported compounds

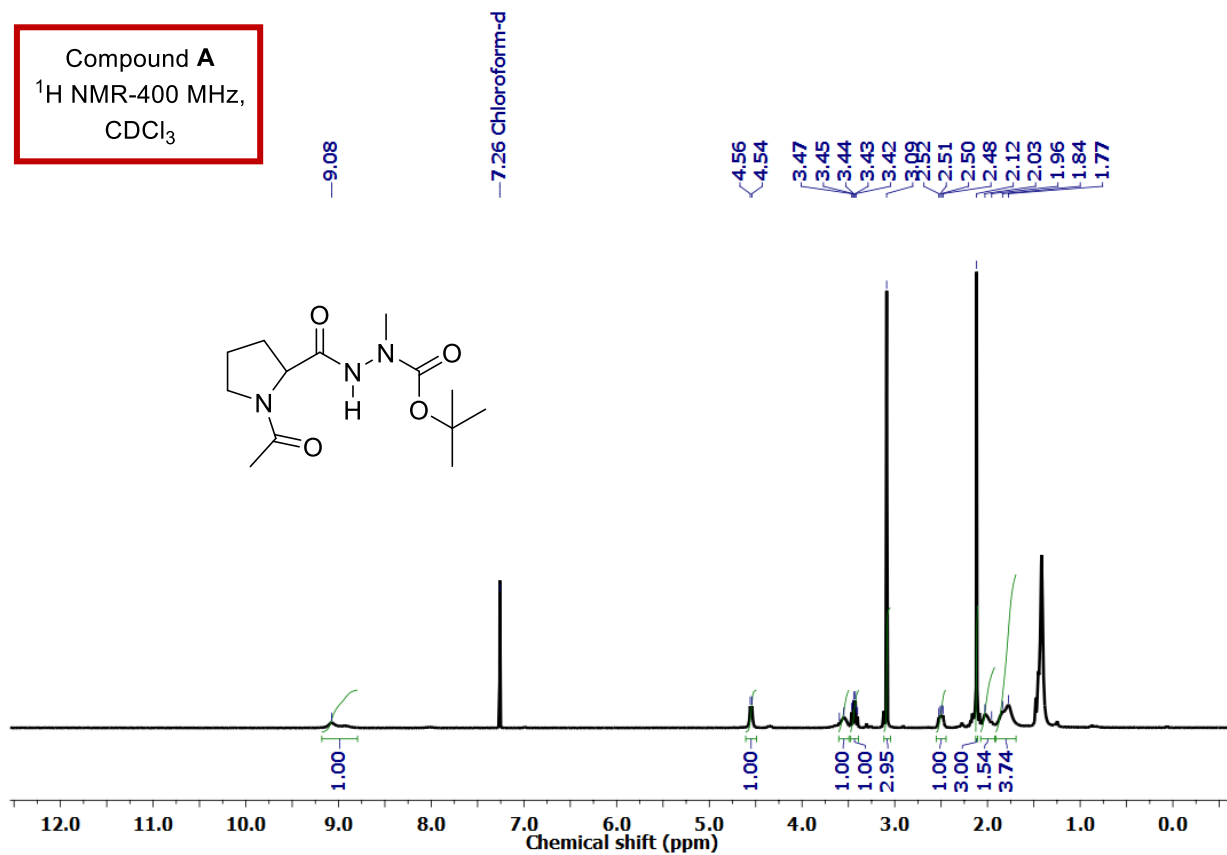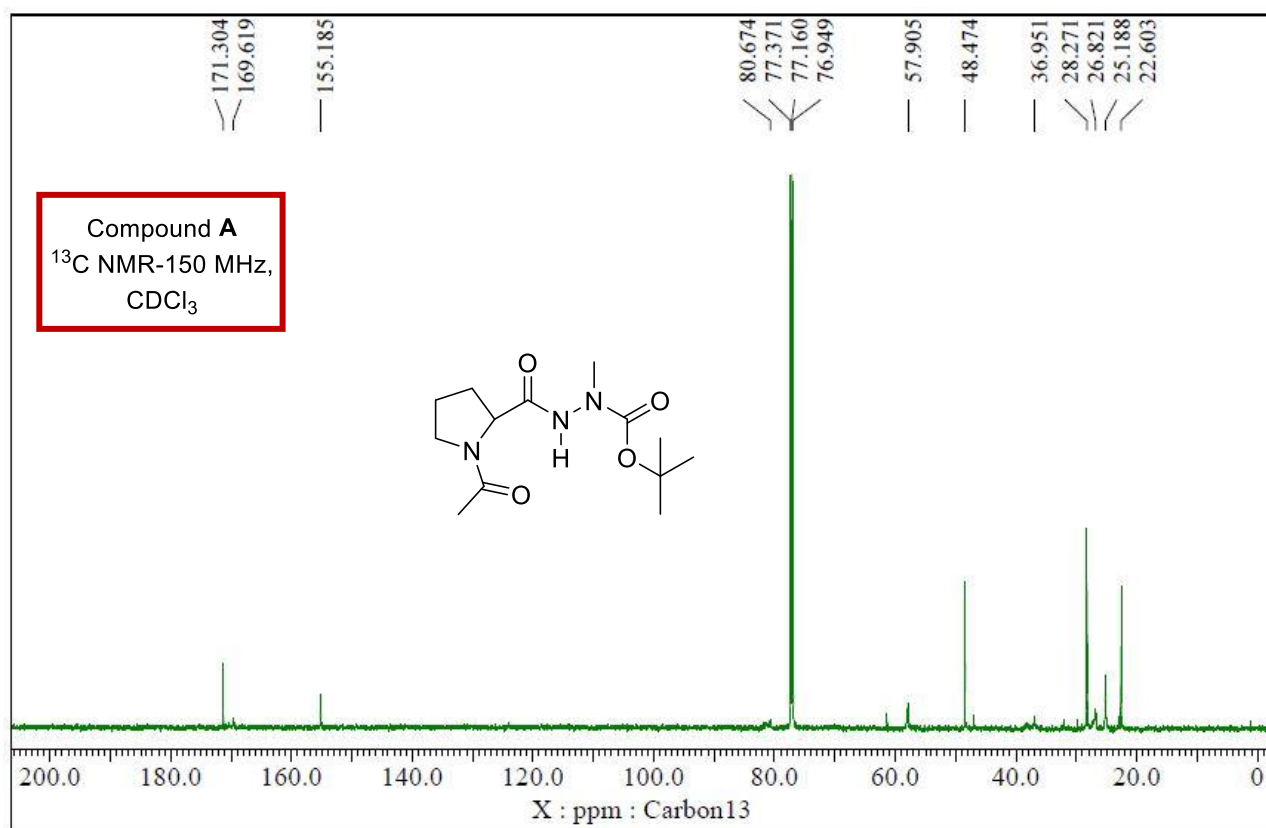



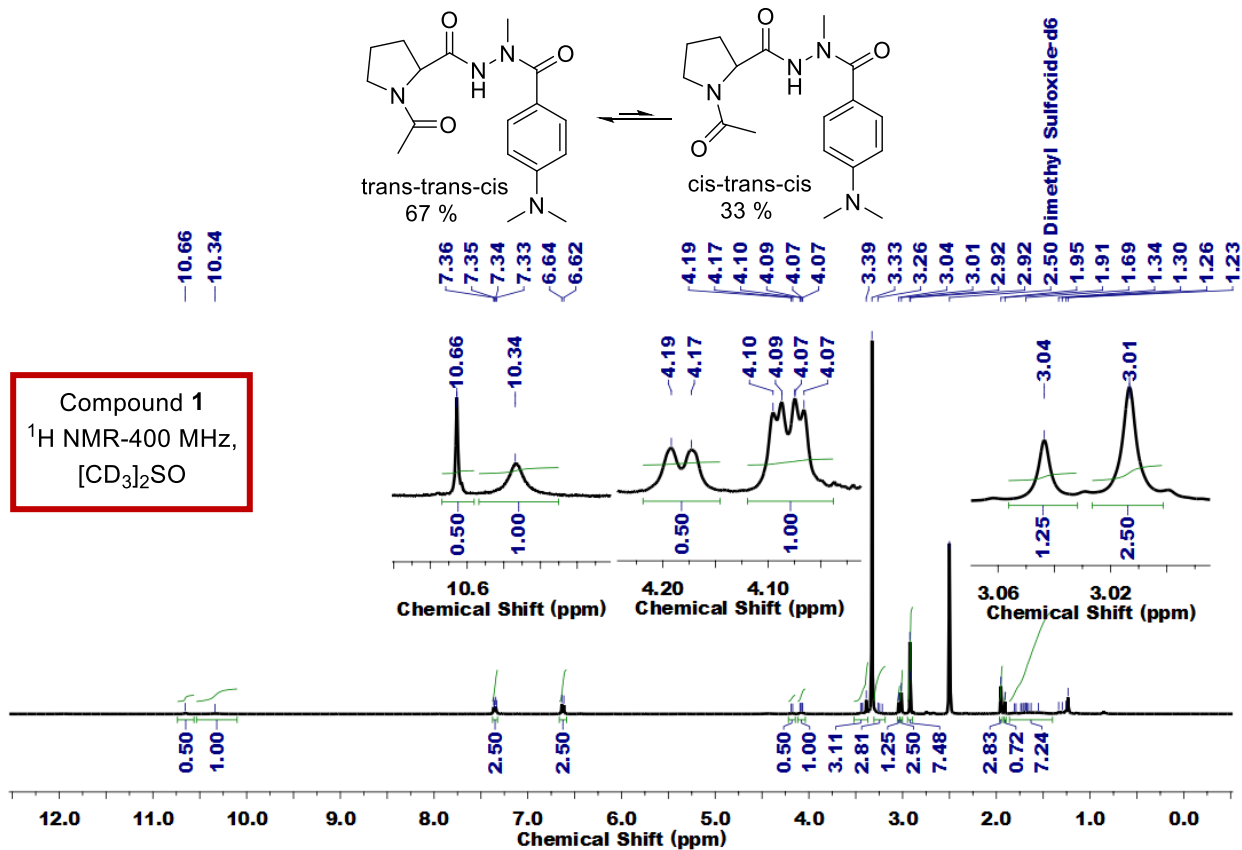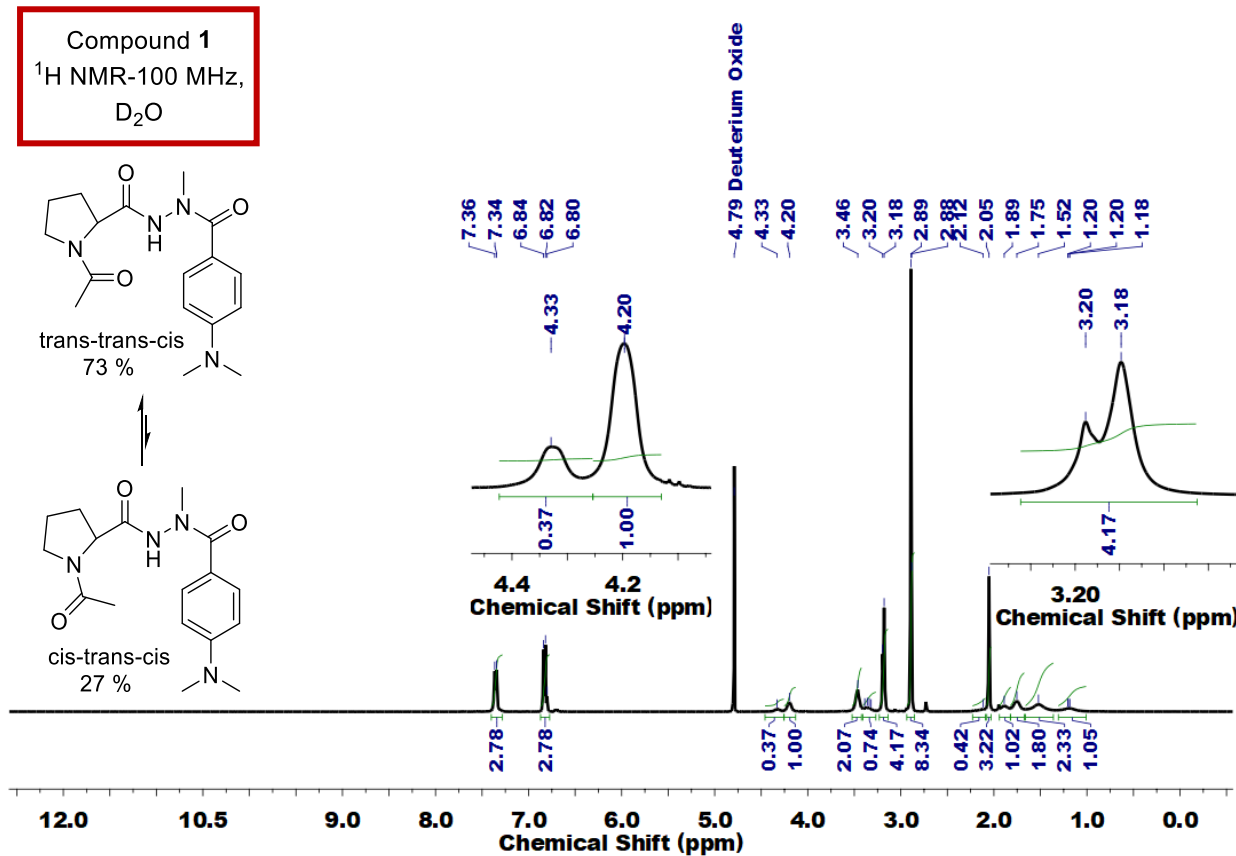



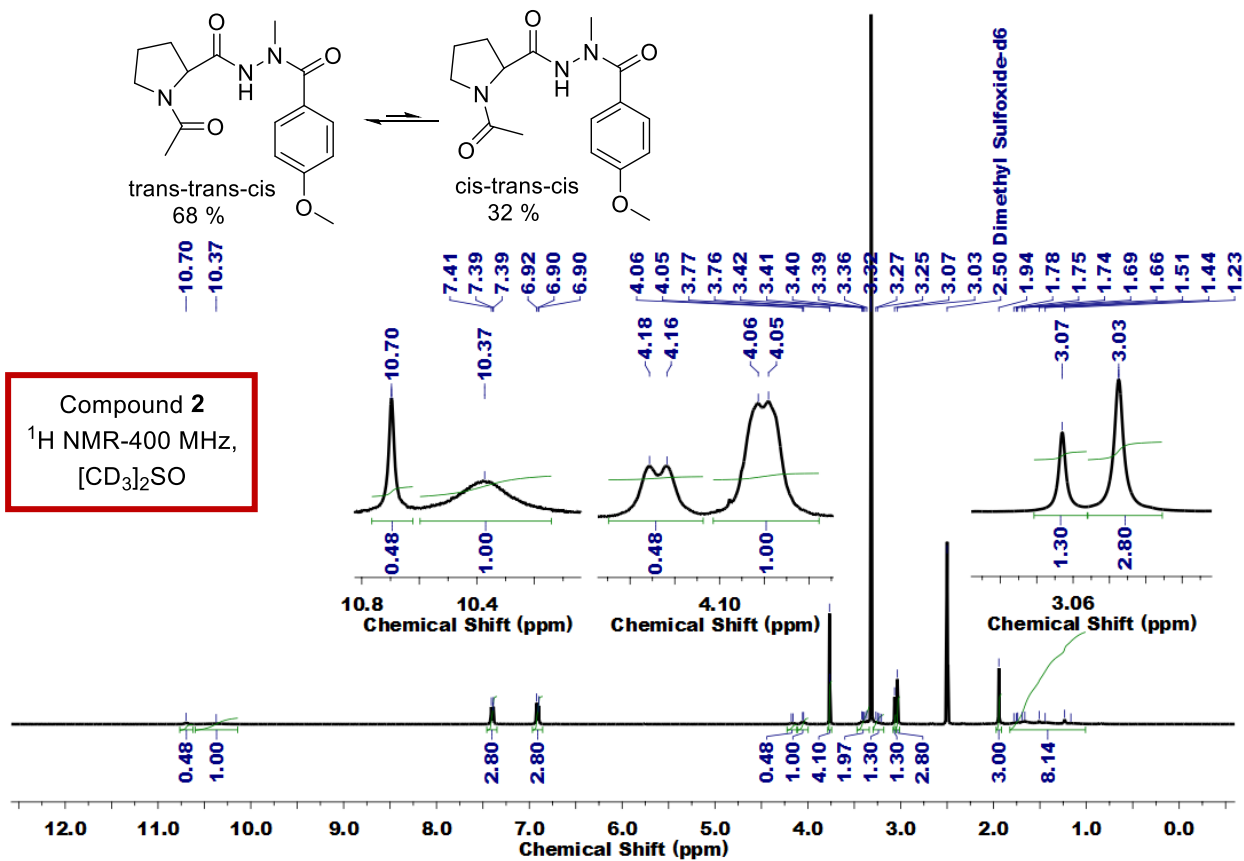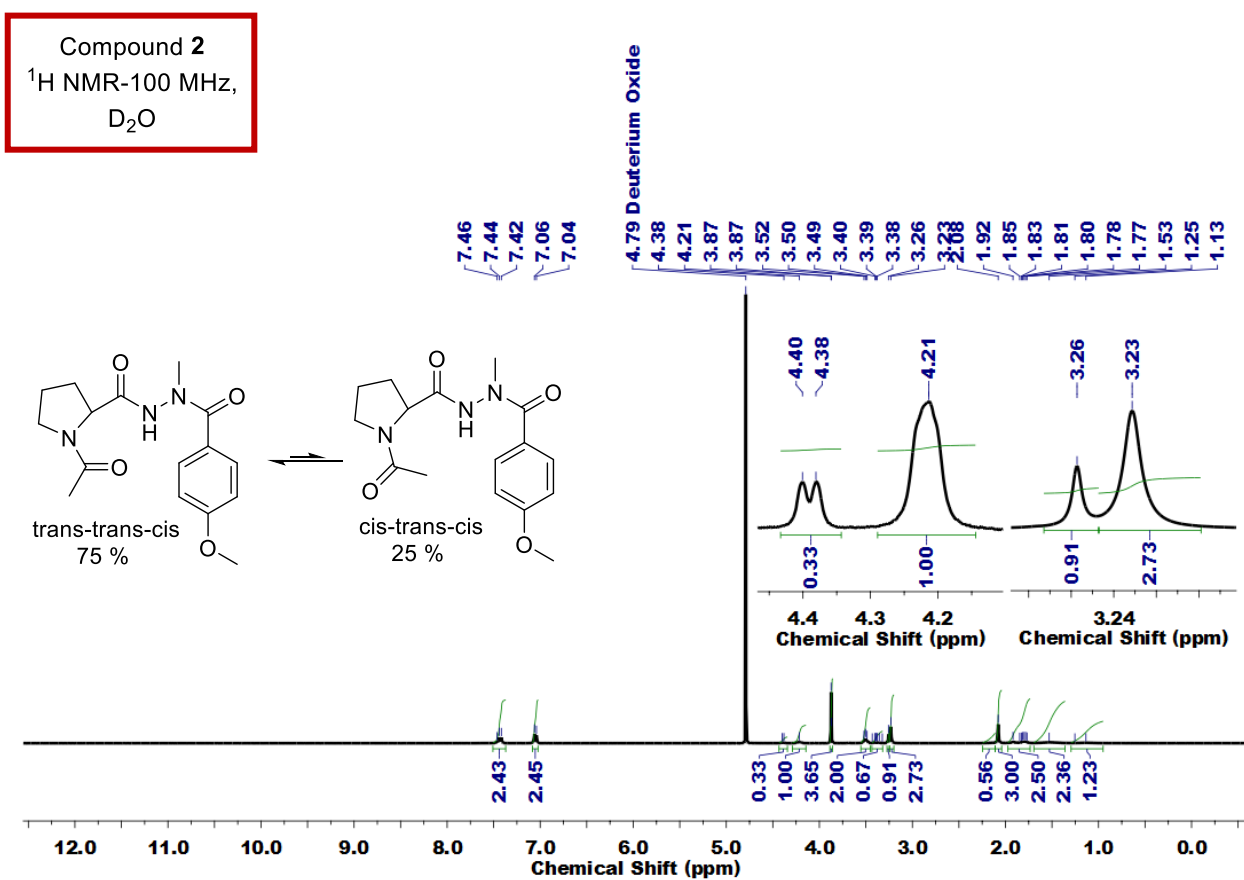

Compound 3  
<sup>1</sup>H NMR-100 MHz,  
 CDCl<sub>3</sub>

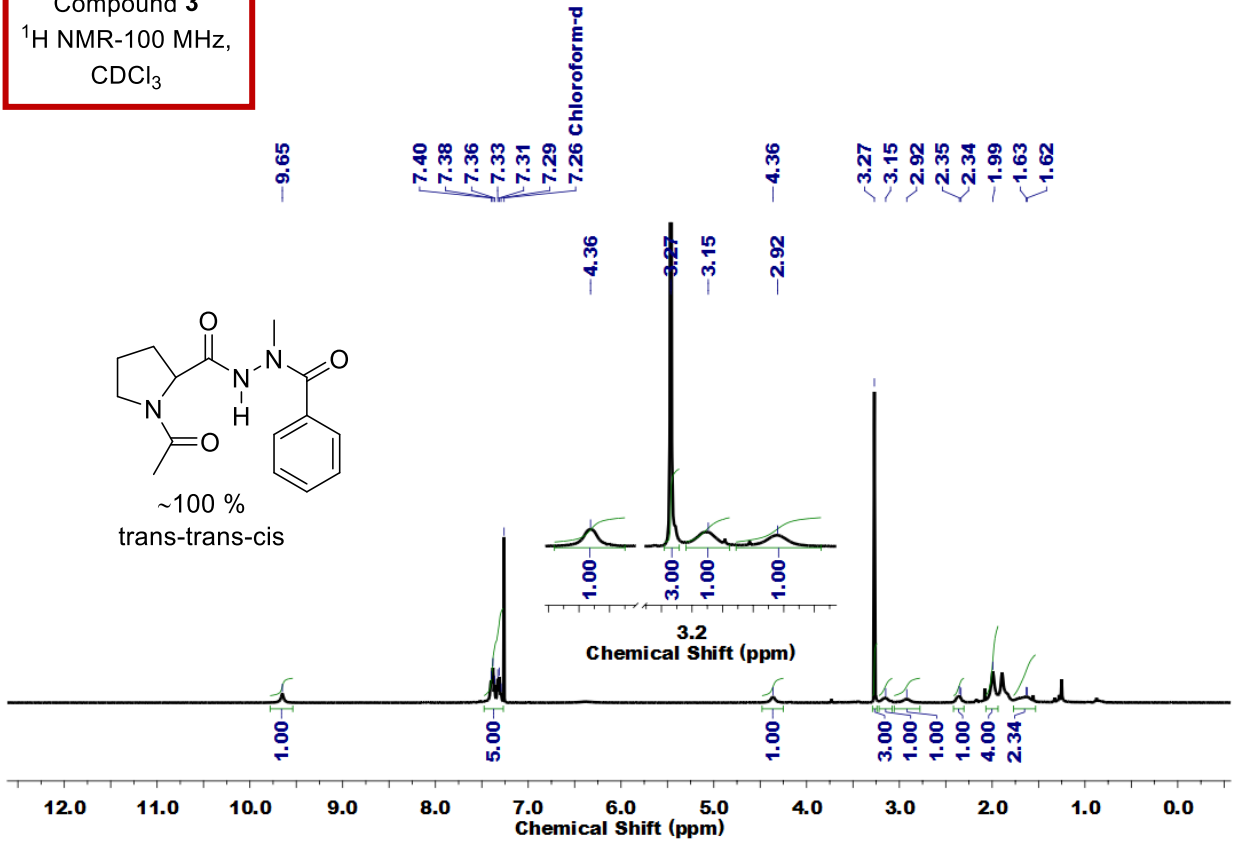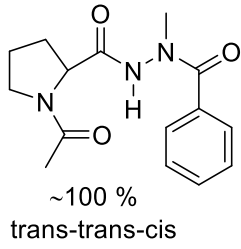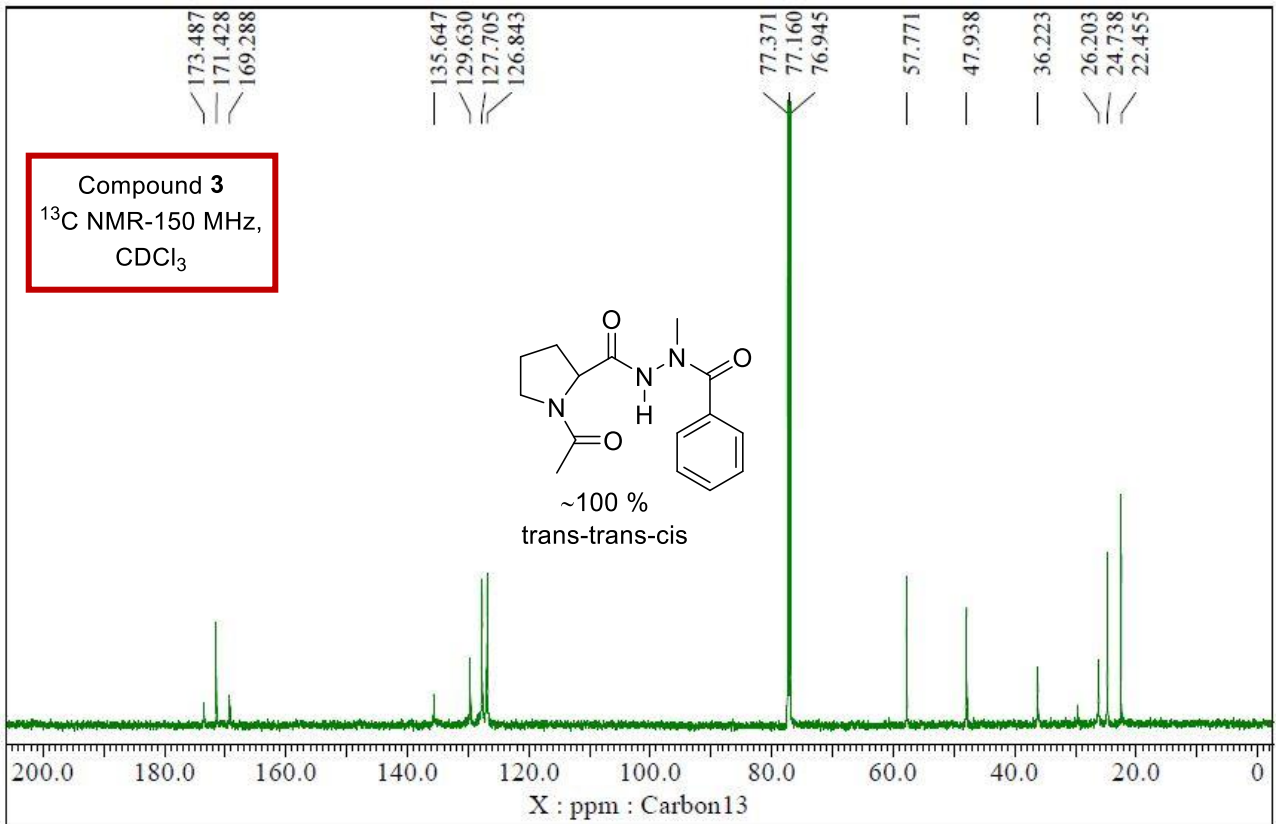

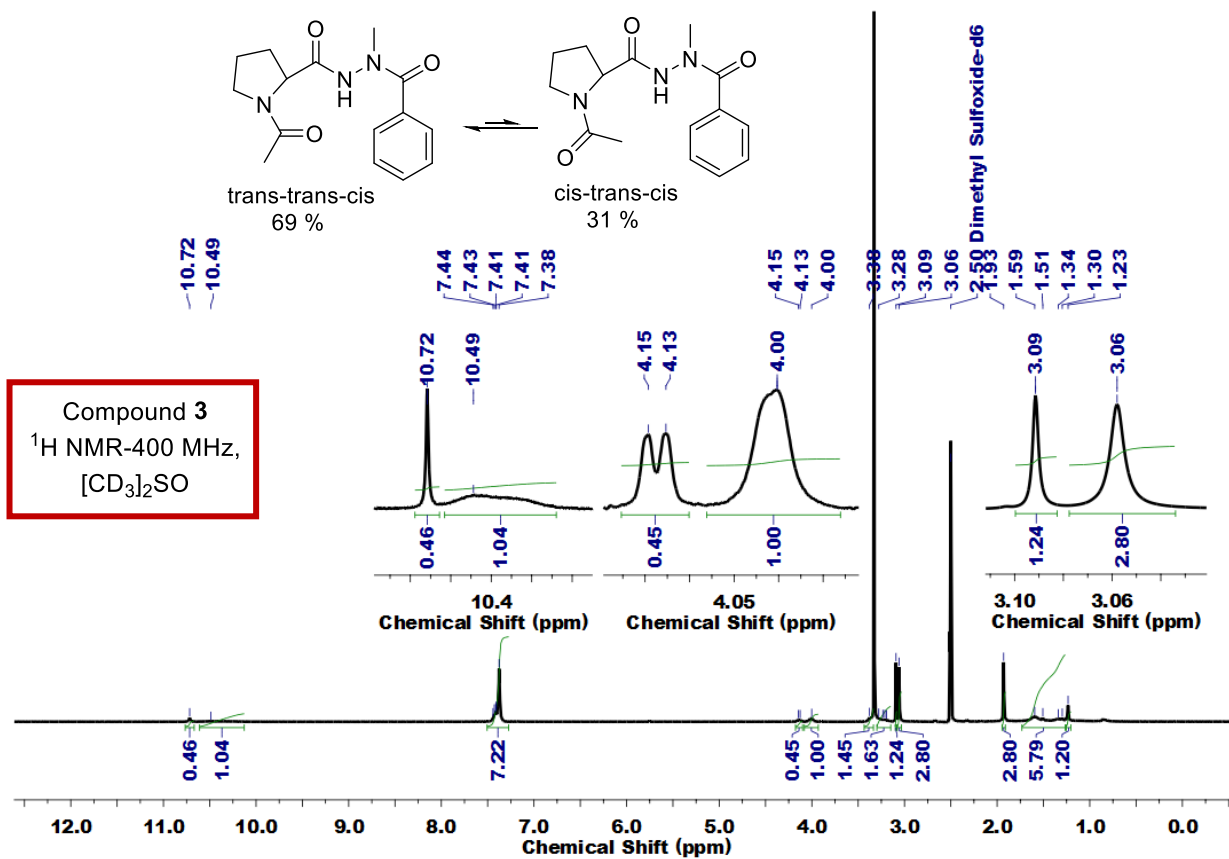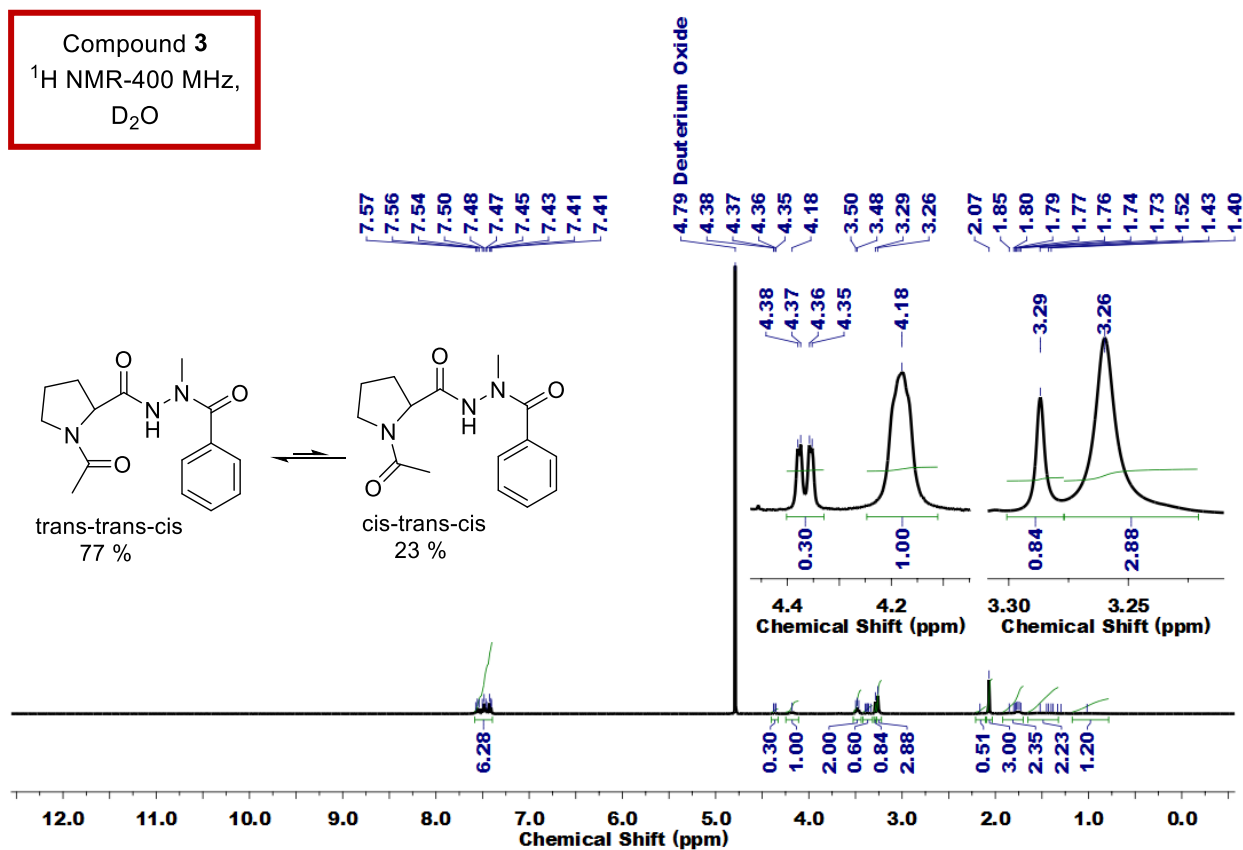

Compound 4  
<sup>1</sup>H NMR-400 MHz,  
 CDCl<sub>3</sub>

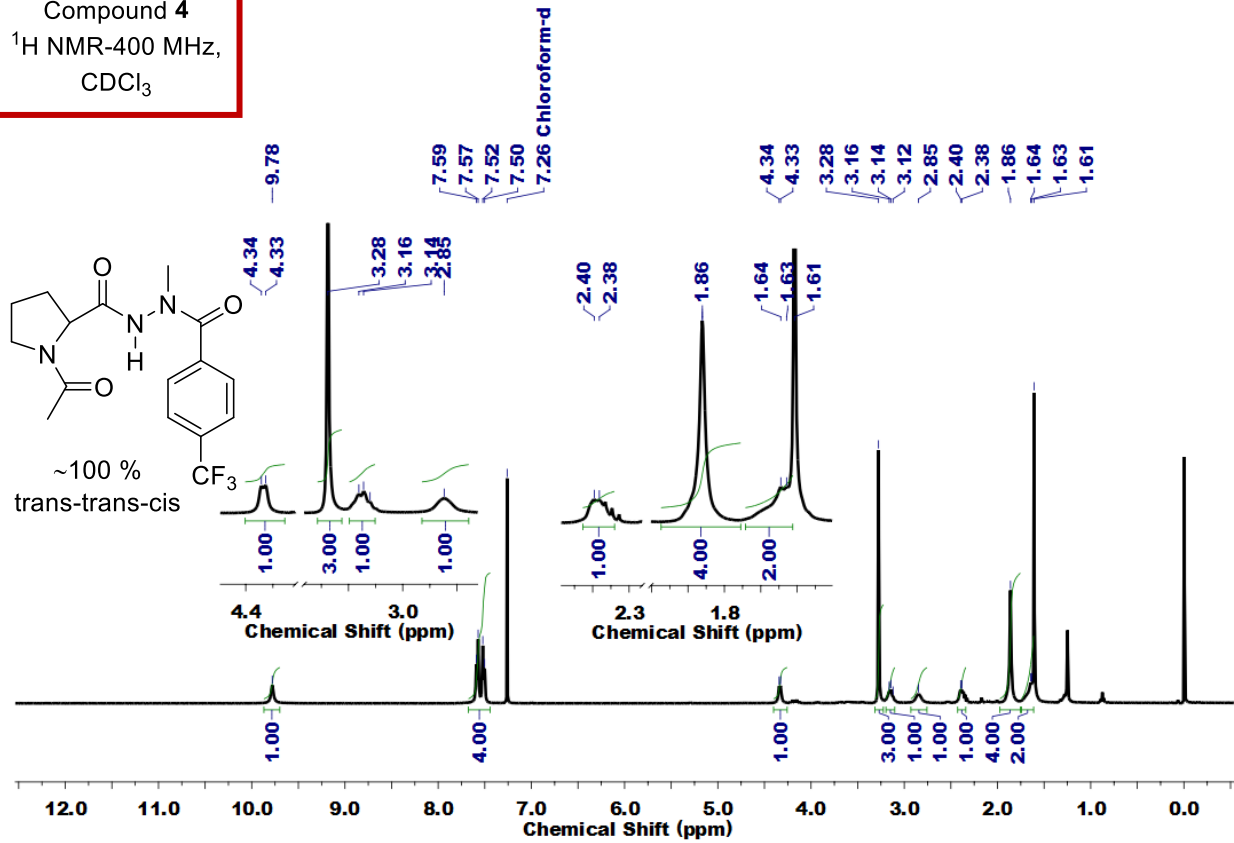

Compound 4  
<sup>19</sup>F NMR-564 MHz,  
 CDCl<sub>3</sub>

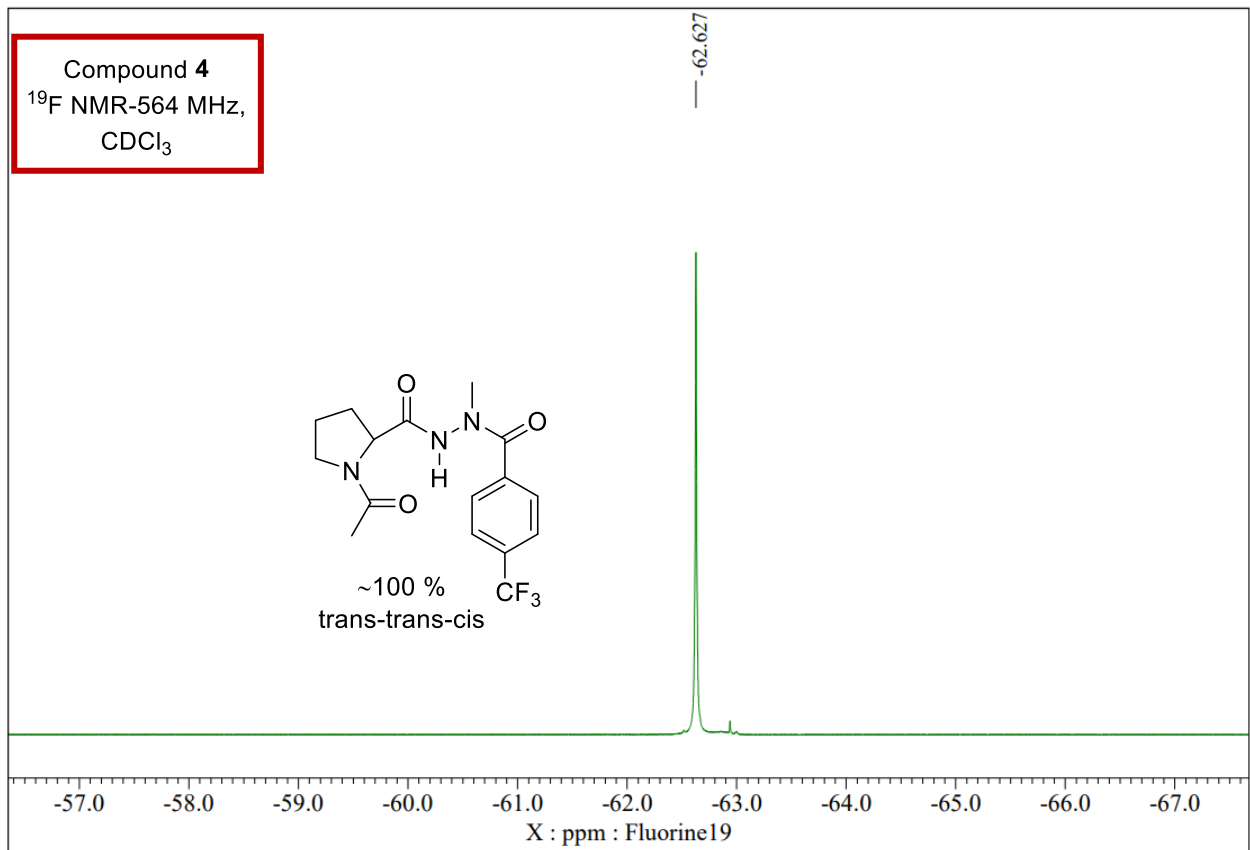



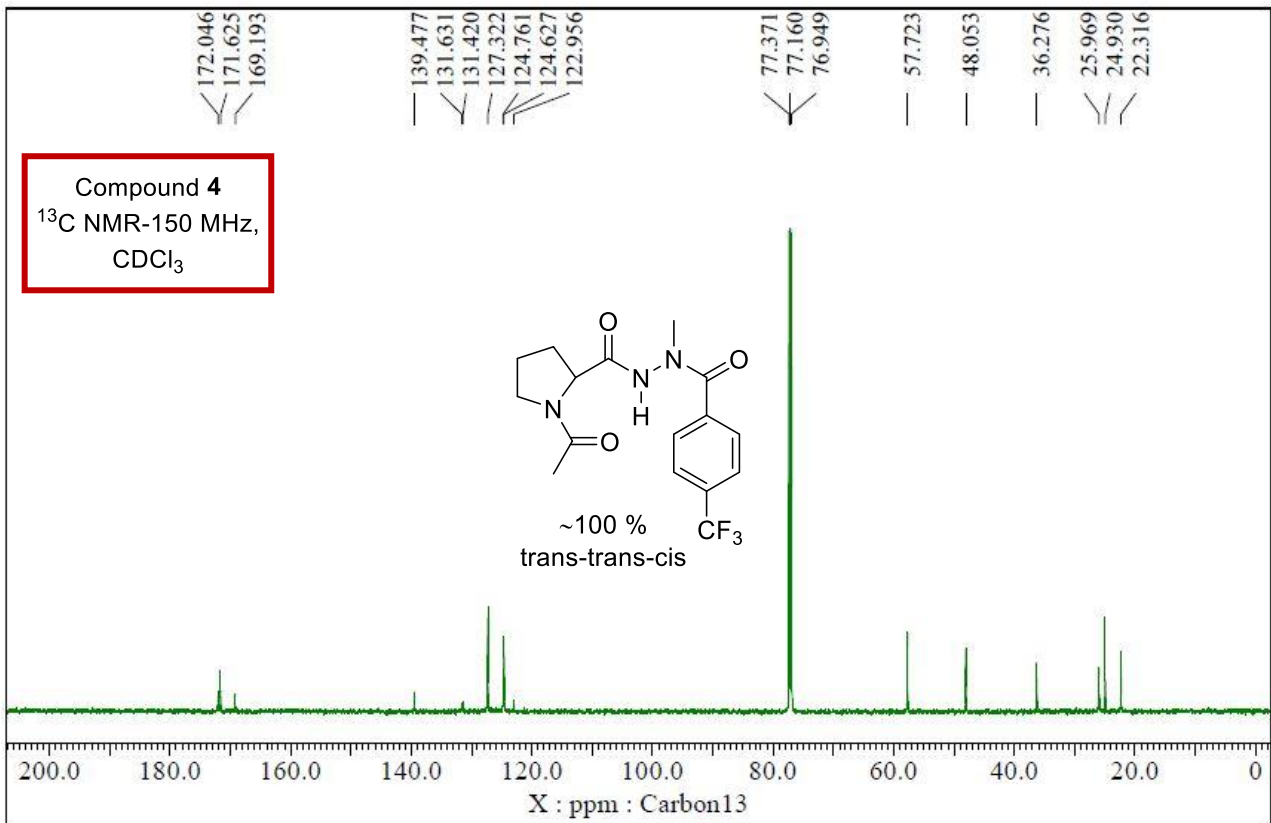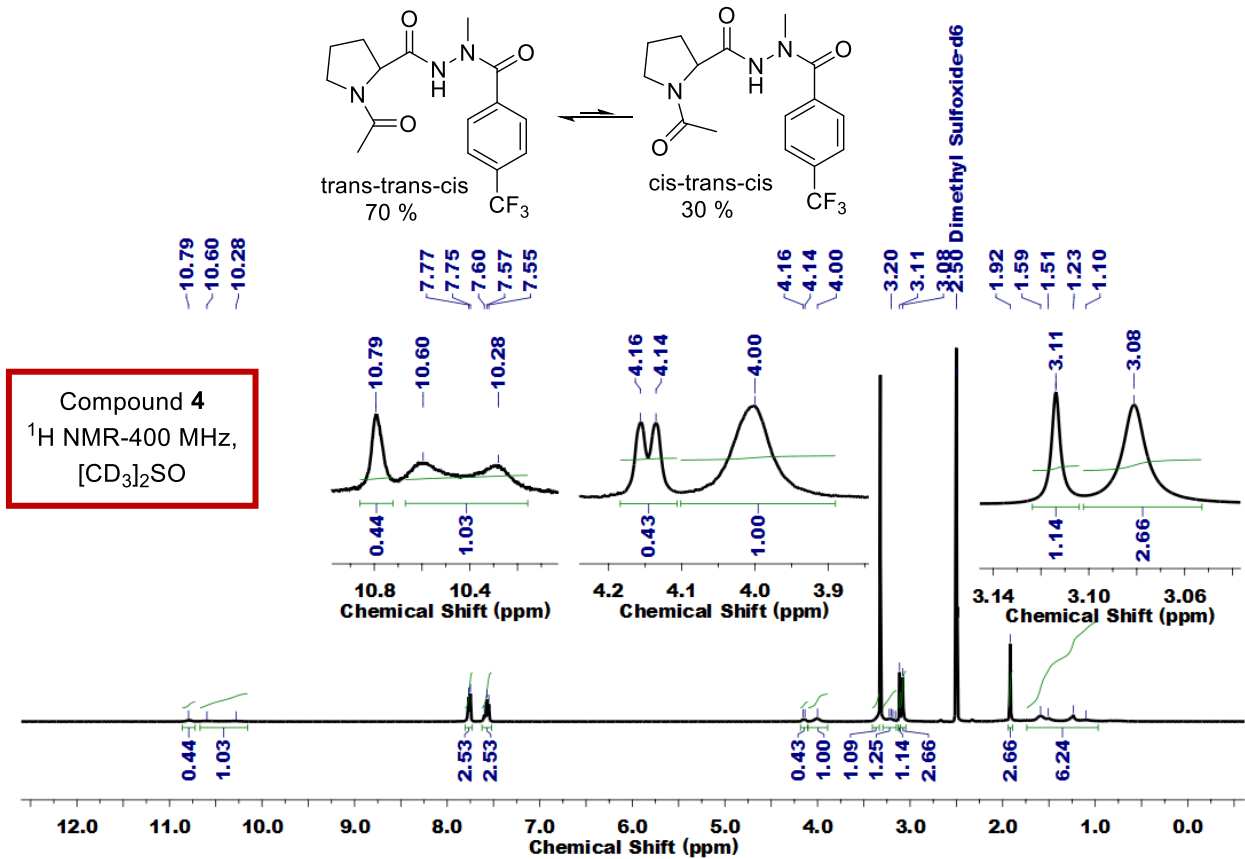

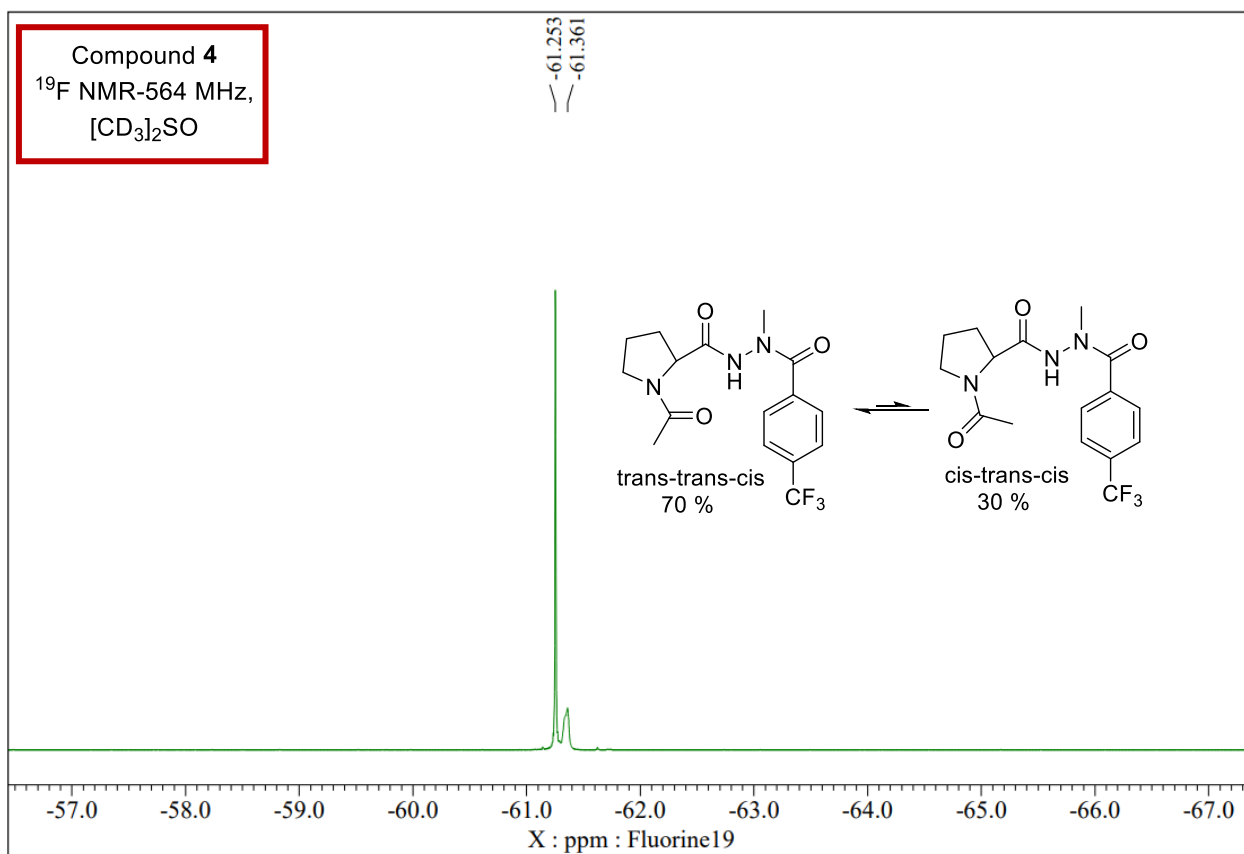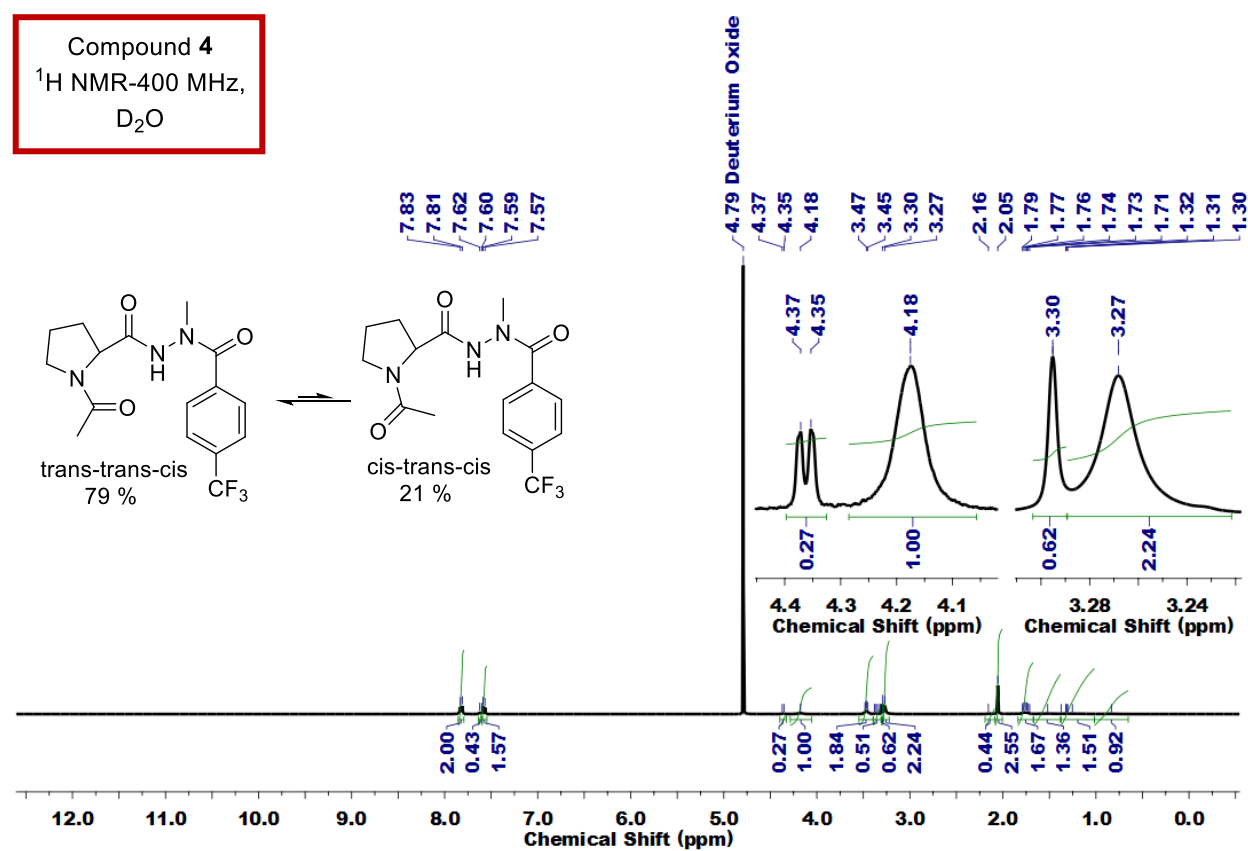

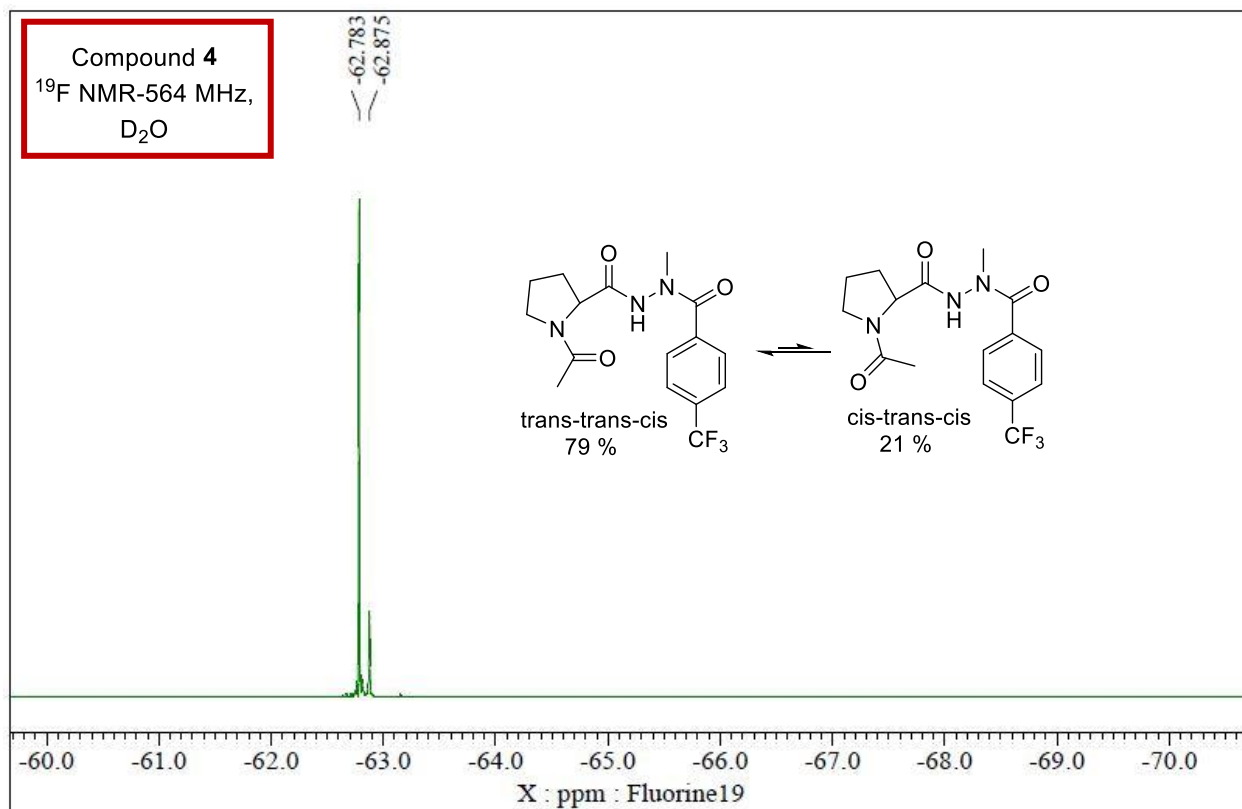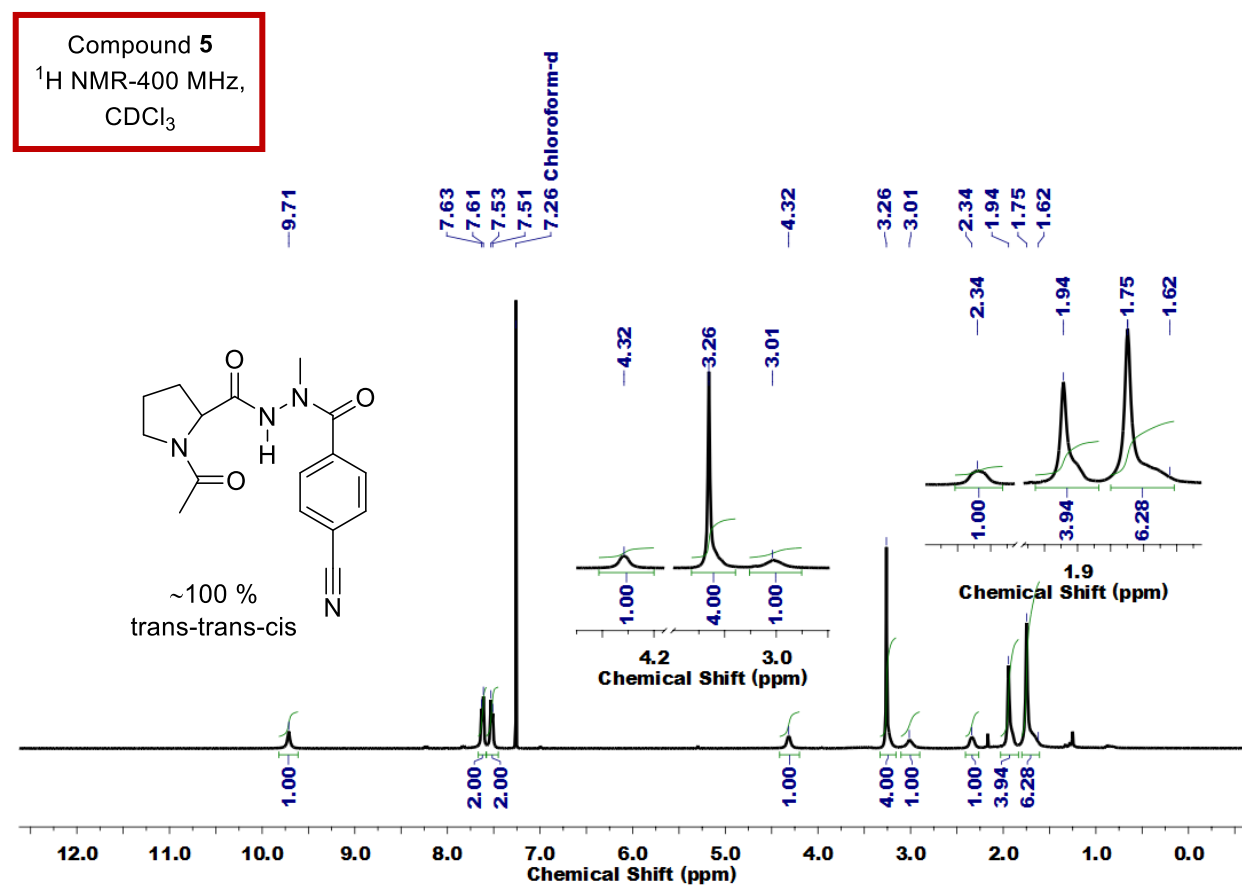

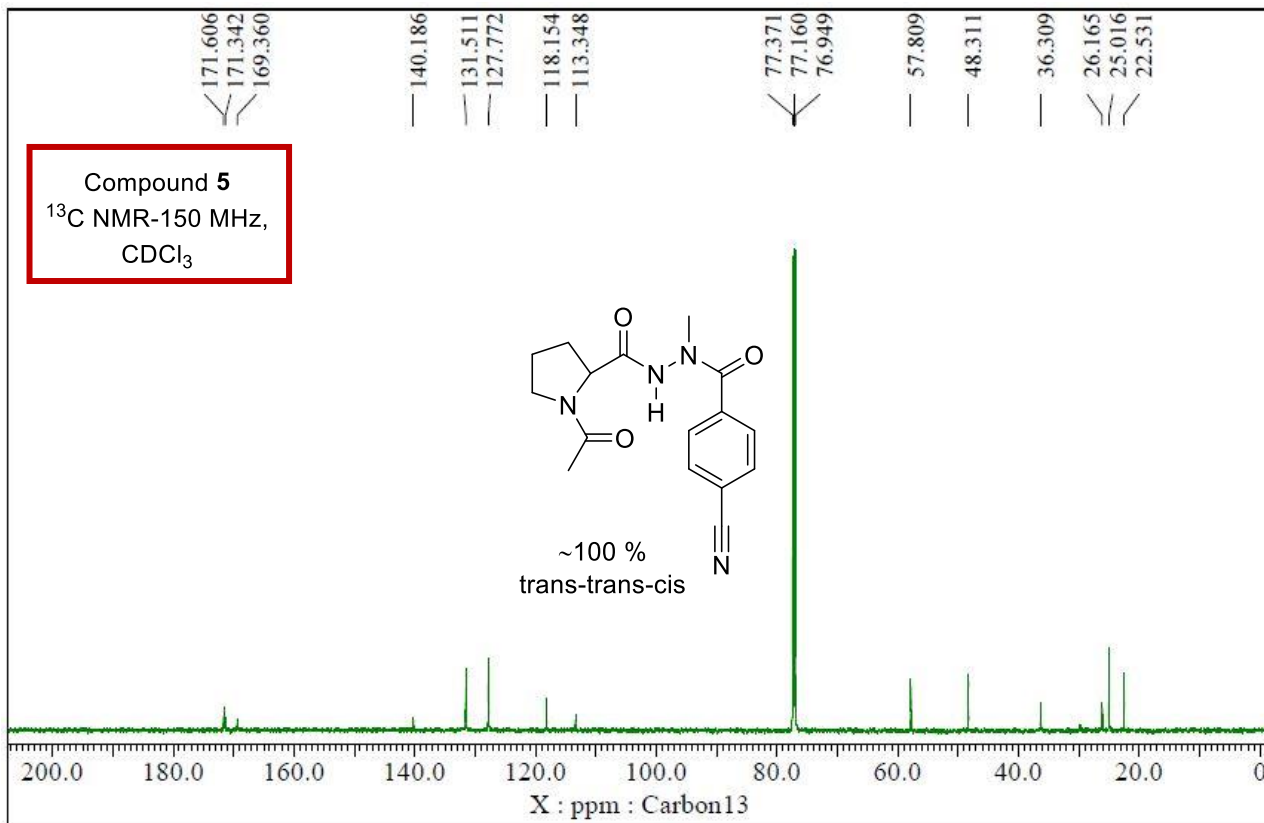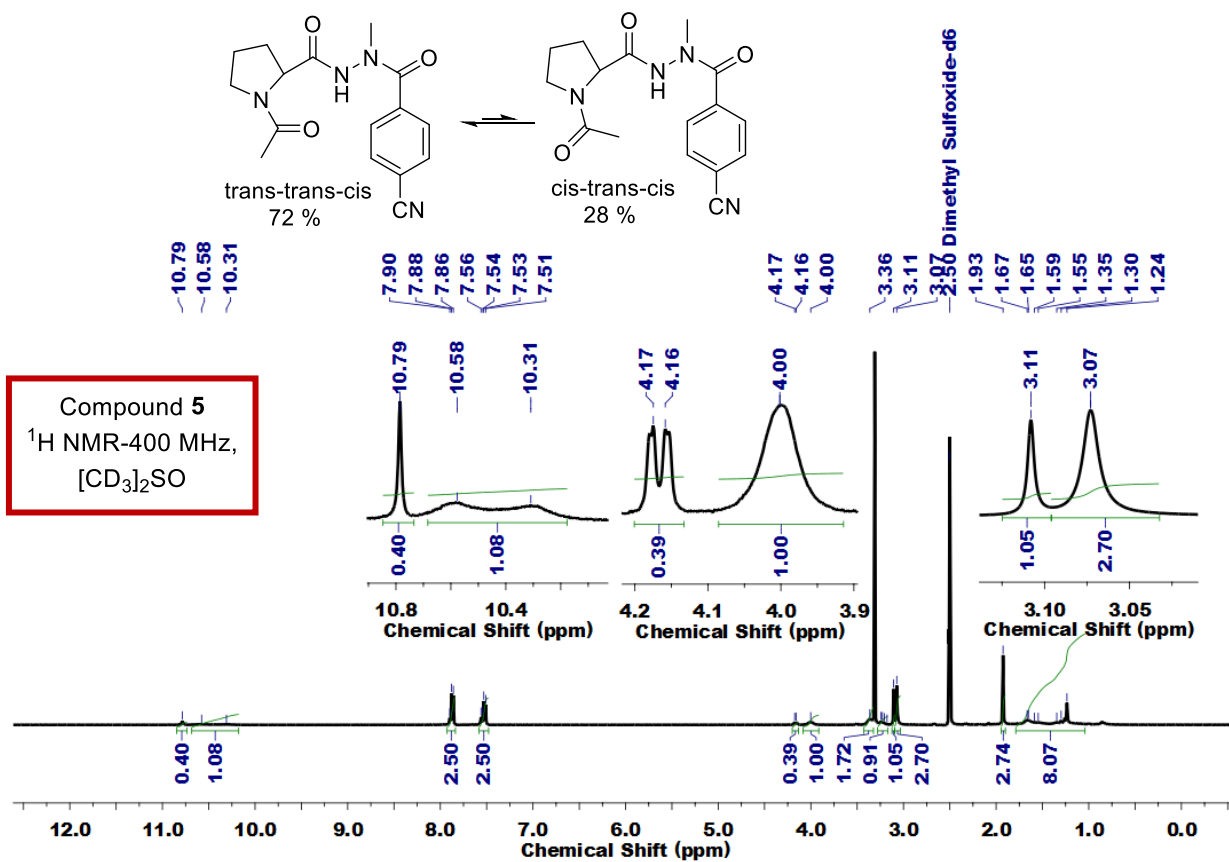

Compound 5  
<sup>1</sup>H NMR-400 MHz,  
 D<sub>2</sub>O

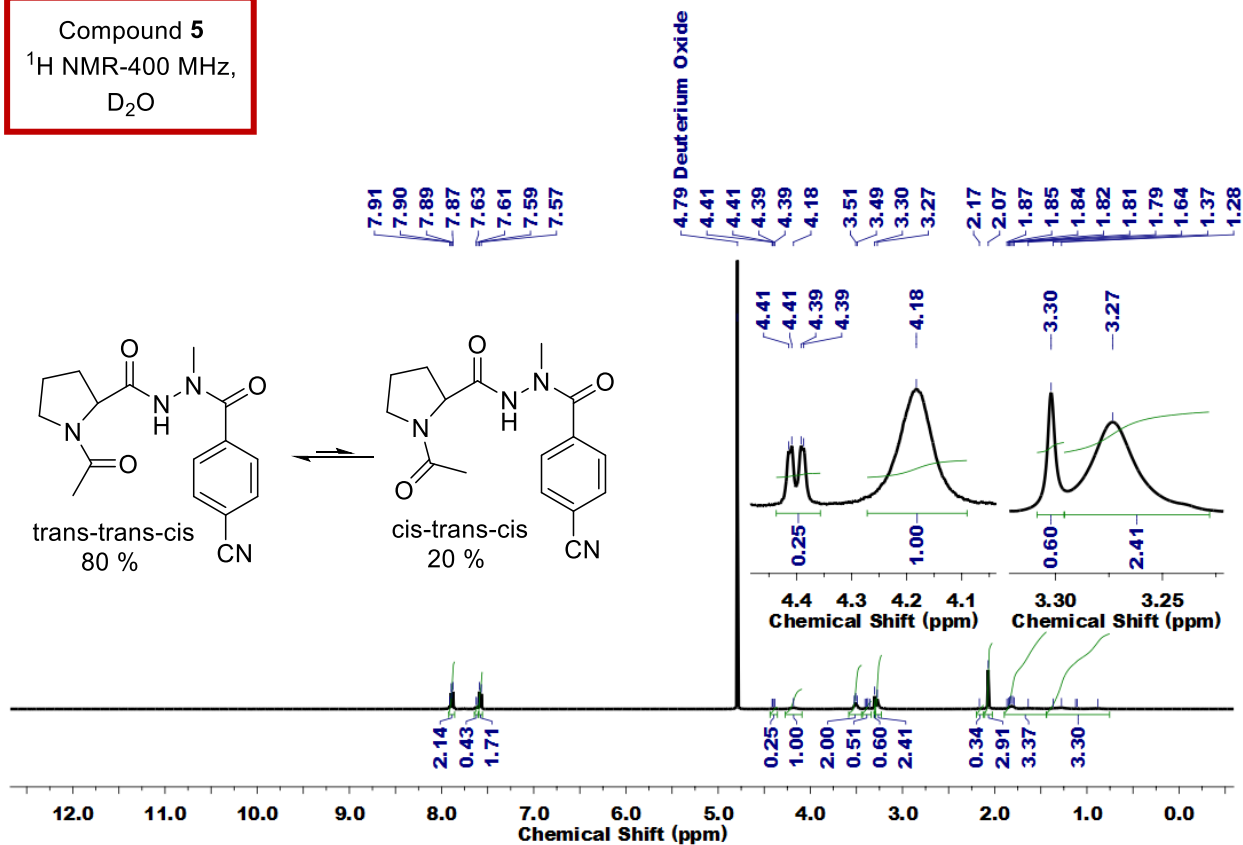

Compound 6  
<sup>1</sup>H NMR-400 MHz,  
 CDCl<sub>3</sub>

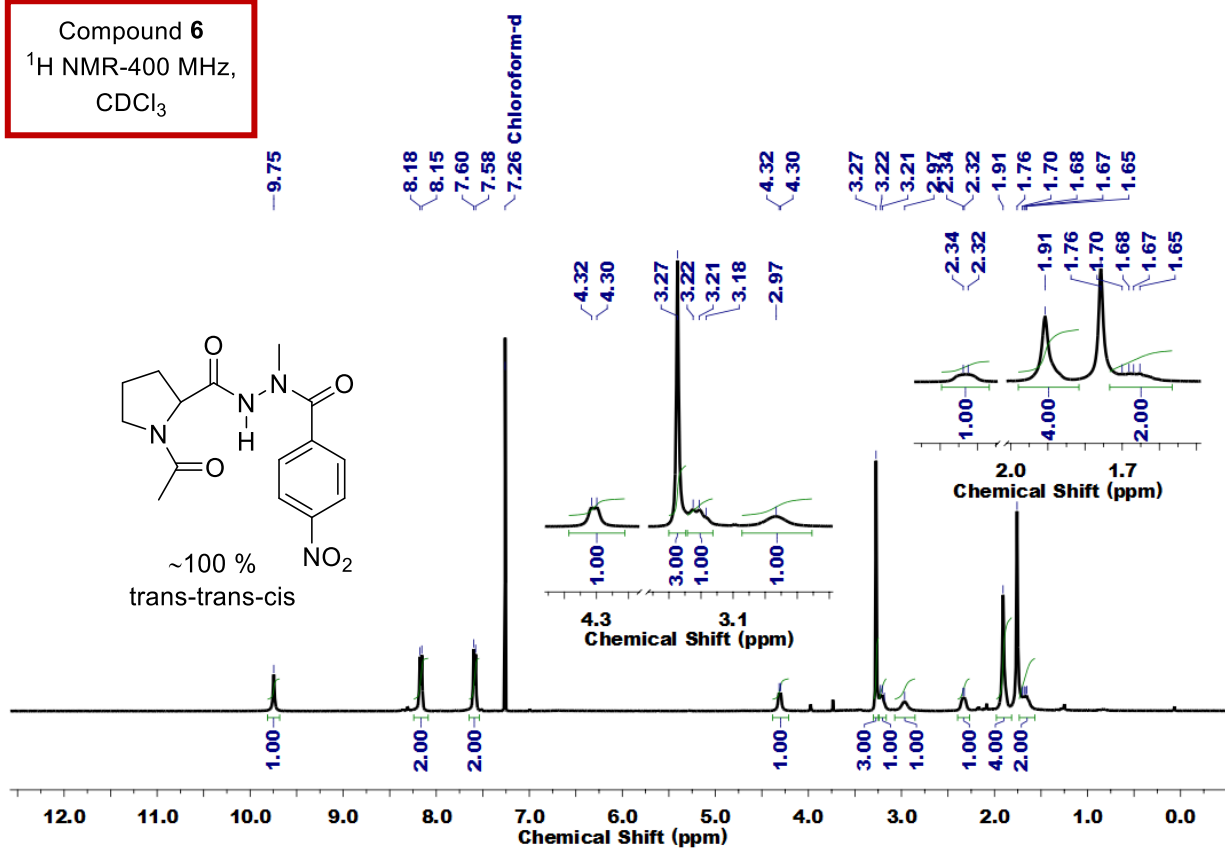

Compound 6  
<sup>13</sup>C NMR-100 MHz,  
 CDCl<sub>3</sub>

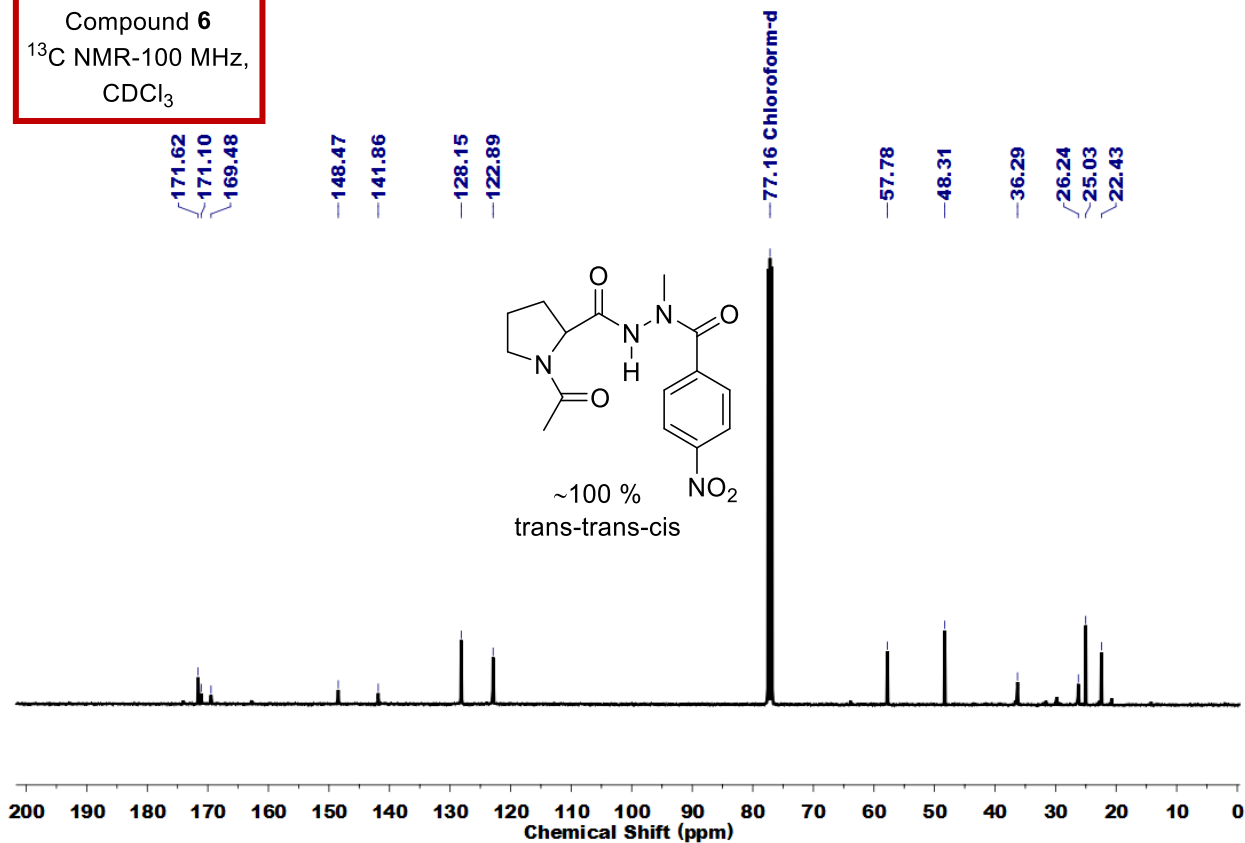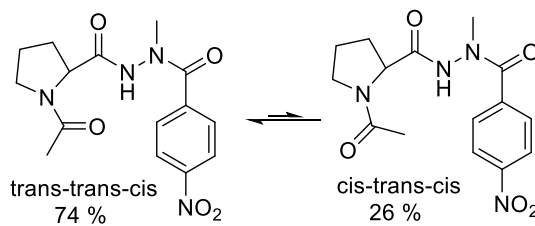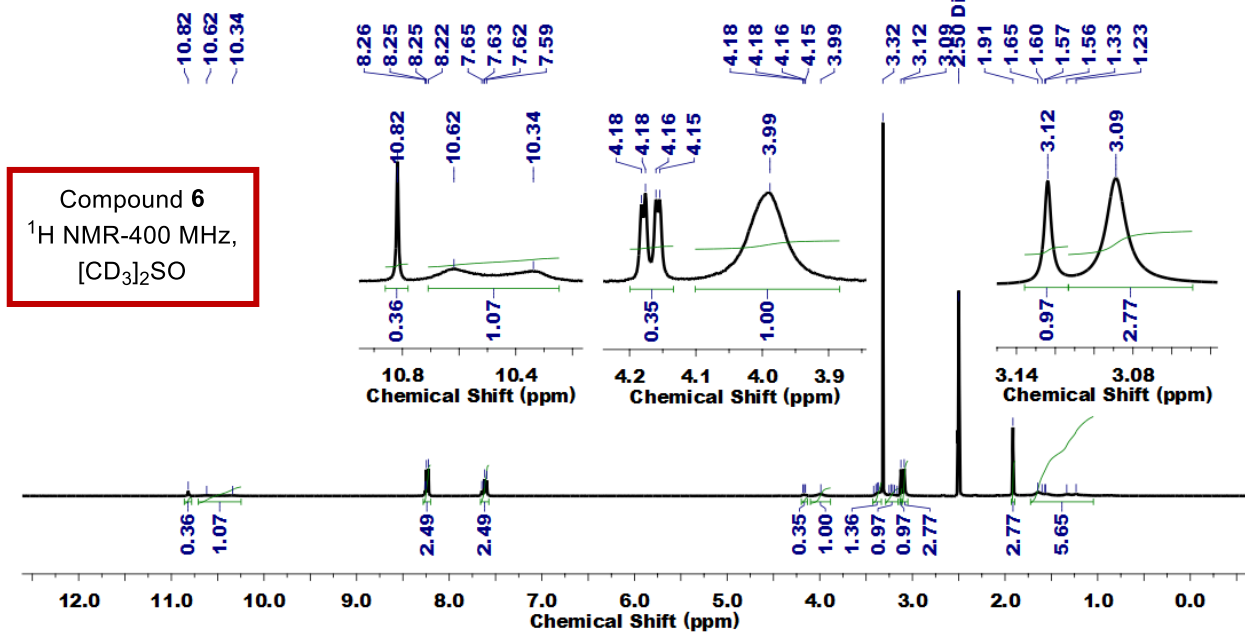

Compound 6  
<sup>1</sup>H NMR-400 MHz,  
 [CD<sub>3</sub>]<sub>2</sub>SO

Compound 6  
 $^1\text{H}$  NMR-400 MHz,  
 $\text{D}_2\text{O}$

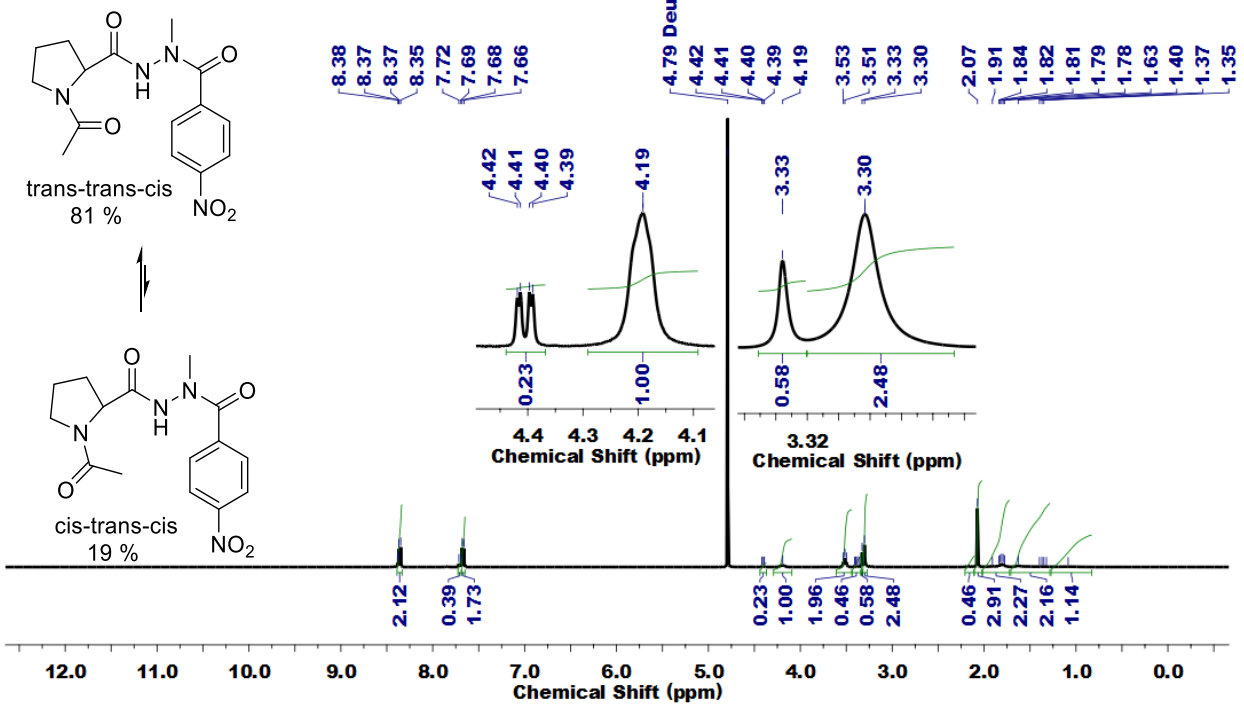

## 11. Cartesian Coordinates of 1-6

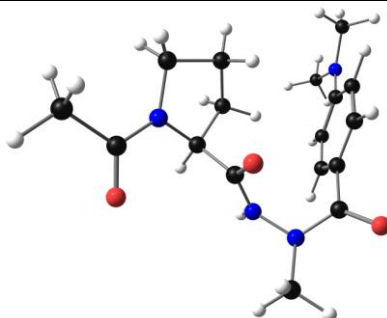

1

E = -1106.85331389 a.u.  
 Level of theory: M062X/6-311+G(2d,p)  
 Solvent: Water

|   |              |              |              |
|---|--------------|--------------|--------------|
| 8 | 1.724943000  | 0.687074000  | 1.000644000  |
| 8 | -0.273923000 | 3.566611000  | 1.355201000  |
| 7 | 1.155899000  | 1.535027000  | -1.012404000 |
| 7 | 0.787374000  | 2.756527000  | -0.474439000 |
| 8 | 4.317192000  | -0.406299000 | -0.858075000 |
| 7 | 2.599780000  | -1.687163000 | -0.192016000 |
| 6 | 1.549087000  | 0.522638000  | -0.190166000 |
| 6 | -0.233725000 | 2.738695000  | 0.463291000  |
| 6 | -1.282021000 | 1.699127000  | 0.281916000  |
| 6 | 1.638064000  | -0.838041000 | -0.868502000 |
| 1 | 1.906662000  | -0.709281000 | -1.917709000 |
| 6 | 3.912101000  | -1.383083000 | -0.229985000 |
| 6 | -2.882711000 | 0.517262000  | -1.091308000 |
| 1 | -3.328206000 | 0.373797000  | -2.064466000 |
| 6 | -1.885633000 | 1.463951000  | -0.951794000 |
| 1 | -1.578772000 | 2.036683000  | -1.819958000 |
| 6 | -2.671623000 | -0.023851000 | 1.251273000  |
| 1 | -2.941619000 | -0.603046000 | 2.121828000  |
| 6 | -1.699318000 | 0.951026000  | 1.378385000  |
| 1 | -1.233715000 | 1.118835000  | 2.342488000  |
| 6 | -3.301085000 | -0.260614000 | 0.010500000  |
| 6 | 1.883302000  | 3.700596000  | -0.281263000 |
| 1 | 2.452612000  | 3.751083000  | -1.206192000 |
| 1 | 2.531486000  | 3.383307000  | 0.538585000  |
| 1 | 1.464694000  | 4.676967000  | -0.055268000 |
| 6 | 0.307920000  | -1.592651000 | -0.685050000 |
| 1 | -0.552583000 | -0.923907000 | -0.689485000 |
| 1 | 0.196276000  | -2.308677000 | -1.500639000 |
| 6 | 4.839297000  | -2.292273000 | 0.534837000  |
| 1 | 5.863487000  | -2.065685000 | 0.252889000  |
| 1 | 4.620403000  | -3.341513000 | 0.336114000  |
| 1 | 4.717533000  | -2.122105000 | 1.606581000  |
| 6 | 0.501597000  | -2.317424000 | 0.648700000  |
| 1 | 0.340840000  | -1.620719000 | 1.472549000  |
| 1 | -0.170970000 | -3.164517000 | 0.770238000  |
| 6 | 1.968639000  | -2.745038000 | 0.607827000  |
| 1 | 2.416258000  | -2.800265000 | 1.598980000  |
| 1 | 2.088168000  | -3.712990000 | 0.113854000  |
| 1 | 0.939473000  | 1.370301000  | -1.985001000 |
| 7 | -4.285142000 | -1.207765000 | -0.119686000 |
| 6 | -4.720401000 | -1.590576000 | -1.451571000 |
| 1 | -3.895170000 | -1.981412000 | -2.058272000 |
| 1 | -5.483294000 | -2.359249000 | -1.364901000 |
| 1 | -5.161417000 | -0.741204000 | -1.975179000 |
| 6 | -4.497934000 | -2.151107000 | 0.964110000  |
| 1 | -4.812645000 | -1.635138000 | 1.872380000  |
| 1 | -5.289777000 | -2.839130000 | 0.681502000  |
| 1 | -3.594139000 | -2.729427000 | 1.189550000  |



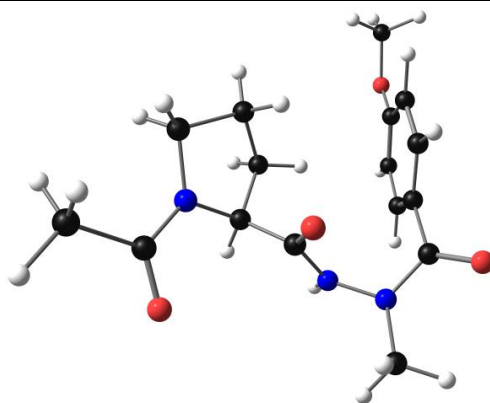

2

E = -1087.42196102

Level of theory: M062X/6-311+G(2d,p)

Solvent: Water

|   |              |              |              |
|---|--------------|--------------|--------------|
| 8 | -1.347816000 | 0.728773000  | -1.037316000 |
| 8 | 1.044942000  | 3.338439000  | -1.385036000 |
| 7 | -0.780307000 | 1.612171000  | 0.960001000  |
| 7 | -0.238932000 | 2.747371000  | 0.384040000  |
| 8 | -4.170990000 | 0.086060000  | 0.657931000  |
| 7 | -2.590502000 | -1.441683000 | 0.209295000  |
| 6 | -1.265905000 | 0.614643000  | 0.169169000  |
| 6 | 0.825599000  | 2.559699000  | -0.476778000 |
| 6 | 1.709018000  | 1.389396000  | -0.192989000 |
| 6 | -1.580179000 | -0.676395000 | 0.913574000  |
| 1 | -1.906439000 | -0.444306000 | 1.928139000  |
| 6 | -3.851225000 | -0.973049000 | 0.120908000  |
| 6 | 3.103010000  | 0.111968000  | 1.299579000  |
| 1 | 3.543026000  | -0.058082000 | 2.273755000  |
| 6 | 2.255409000  | 1.177628000  | 1.074836000  |
| 1 | 2.021824000  | 1.857806000  | 1.885774000  |
| 6 | 2.849124000  | -0.581386000 | -1.002219000 |
| 1 | 3.058156000  | -1.259768000 | -1.816518000 |
| 6 | 2.020855000  | 0.514034000  | -1.221926000 |
| 1 | 1.597856000  | 0.676541000  | -2.205893000 |
| 6 | 3.395049000  | -0.781730000 | 0.264016000  |
| 6 | -1.192567000 | 3.811746000  | 0.087821000  |
| 1 | -1.794946000 | 3.982560000  | 0.976617000  |
| 1 | -1.834948000 | 3.534571000  | -0.750770000 |
| 1 | -0.640247000 | 4.713396000  | -0.160019000 |
| 6 | -0.349797000 | -1.602060000 | 0.883984000  |
| 1 | 0.587511000  | -1.047619000 | 0.925242000  |
| 1 | -0.394747000 | -2.271722000 | 1.743971000  |
| 6 | -4.828883000 | -1.806310000 | -0.667011000 |
| 1 | -5.832922000 | -1.434839000 | -0.483511000 |
| 1 | -4.764398000 | -2.859599000 | -0.393691000 |
| 1 | -4.606060000 | -1.722728000 | -1.732727000 |
| 6 | -0.534530000 | -2.382058000 | -0.419485000 |
| 1 | -0.224661000 | -1.765998000 | -1.264795000 |
| 1 | 0.030636000  | -3.312053000 | -0.438706000 |
| 6 | -2.043541000 | -2.620192000 | -0.475794000 |
| 1 | -2.418879000 | -2.684154000 | -1.495938000 |
| 1 | -2.323700000 | -3.531284000 | 0.059511000  |
| 1 | -0.662562000 | 1.491438000  | 1.955782000  |
| 8 | 4.212952000  | -1.810176000 | 0.585789000  |
| 6 | 4.510596000  | -2.757849000 | -0.429327000 |
| 1 | 5.027884000  | -2.283727000 | -1.265628000 |
| 1 | 5.161220000  | -3.495519000 | 0.030917000  |
| 1 | 3.599689000  | -3.243203000 | -0.785953000 |

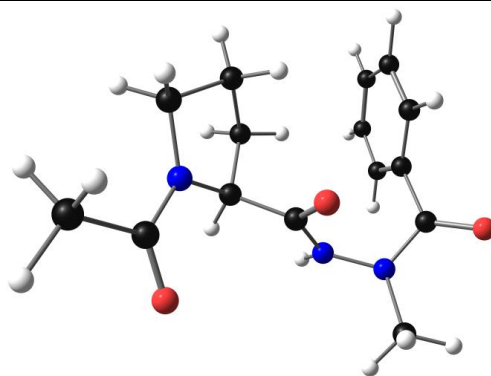

3

E = -972.902950764

Level of theory: M062X/6-311+G(2d,p)

Solvent: Water

|   |              |              |              |
|---|--------------|--------------|--------------|
| 8 | -0.597506000 | 0.814041000  | -1.033240000 |
| 8 | 2.723012000  | 2.175217000  | -1.325096000 |
| 7 | 0.293245000  | 1.348273000  | 0.970226000  |
| 7 | 1.263415000  | 2.154657000  | 0.405548000  |
| 8 | -3.413518000 | 1.443416000  | 0.669627000  |
| 1 | 3.267751000  | -3.629476000 | 0.359767000  |
| 7 | -2.656948000 | -0.616285000 | 0.204831000  |
| 6 | -0.574246000 | 0.665229000  | 0.171815000  |
| 6 | 2.160681000  | 1.549390000  | -0.447334000 |
| 6 | 2.445835000  | 0.100122000  | -0.195033000 |
| 6 | -1.413526000 | -0.370128000 | 0.908367000  |
| 1 | -1.605190000 | -0.028344000 | 1.926376000  |
| 6 | -3.588256000 | 0.354886000  | 0.124835000  |
| 6 | 3.189045000  | -1.676183000 | 1.247804000  |
| 1 | 3.537889000  | -2.014038000 | 2.215238000  |
| 6 | 2.880114000  | -0.336741000 | 1.054054000  |
| 1 | 2.983026000  | 0.371148000  | 1.868410000  |
| 6 | 2.598682000  | -2.146234000 | -1.040492000 |
| 1 | 2.478470000  | -2.851998000 | -1.852613000 |
| 6 | 2.313622000  | -0.802001000 | -1.244845000 |
| 1 | 1.973197000  | -0.449630000 | -2.210870000 |
| 6 | 3.039877000  | -2.582660000 | 0.203368000  |
| 6 | 0.860300000  | 3.531564000  | 0.138600000  |
| 1 | 0.393182000  | 3.927379000  | 1.036996000  |
| 1 | 0.157934000  | 3.573689000  | -0.696502000 |
| 1 | 1.746473000  | 4.111807000  | -0.100591000 |
| 6 | -0.703618000 | -1.736057000 | 0.864496000  |
| 1 | 0.381700000  | -1.641435000 | 0.902372000  |
| 1 | -1.030289000 | -2.328228000 | 1.720430000  |
| 6 | -4.832926000 | 0.036382000  | -0.662687000 |
| 1 | -5.577595000 | 0.801957000  | -0.464691000 |
| 1 | -5.228103000 | -0.945729000 | -0.402951000 |
| 1 | -4.600069000 | 0.032307000  | -1.729568000 |
| 6 | -1.212274000 | -2.347898000 | -0.442824000 |
| 1 | -0.669456000 | -1.919056000 | -1.286382000 |
| 1 | -1.105254000 | -3.430510000 | -0.471843000 |
| 6 | -2.675989000 | -1.909513000 | -0.490887000 |
| 1 | -3.044970000 | -1.796072000 | -1.509032000 |
| 1 | -3.321186000 | -2.614074000 | 0.040467000  |
| 1 | 0.344683000  | 1.181457000  | 1.964992000  |

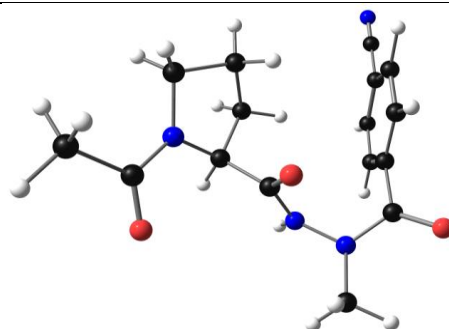

5

E = -1065.14749362

Level of theory: M062X/6-311+G(2d,p)

Solvent: Water

|   |              |              |              |
|---|--------------|--------------|--------------|
| 8 | 1.196232000  | 0.761165000  | 1.008822000  |
| 8 | -1.362998000 | 3.305639000  | 1.268917000  |
| 7 | 0.538158000  | 1.542314000  | -1.002124000 |
| 7 | -0.032840000 | 2.674164000  | -0.453890000 |
| 8 | 4.036638000  | 0.310161000  | -0.699259000 |
| 7 | 2.596979000  | -1.335584000 | -0.201057000 |
| 6 | 1.116228000  | 0.609604000  | -0.193269000 |
| 6 | -1.073129000 | 2.484560000  | 0.422246000  |
| 6 | -1.873238000 | 1.225931000  | 0.241494000  |
| 6 | 1.521477000  | -0.671302000 | -0.910087000 |
| 1 | 1.816421000  | -0.439931000 | -1.934379000 |
| 6 | 3.814814000  | -0.760414000 | -0.136772000 |
| 6 | -3.279443000 | -0.188372000 | -1.100605000 |
| 1 | -3.779841000 | -0.409647000 | -2.033604000 |
| 6 | -2.502503000 | 0.949915000  | -0.969388000 |
| 1 | -2.387778000 | 1.625760000  | -1.807886000 |
| 6 | -2.769870000 | -0.788854000 | 1.196053000  |
| 1 | -2.872118000 | -1.475625000 | 2.025569000  |
| 6 | -2.013661000 | 0.364778000  | 1.324020000  |
| 1 | -1.517137000 | 0.592320000  | 2.258473000  |
| 6 | -3.402494000 | -1.059448000 | -0.017218000 |
| 6 | 0.865141000  | 3.807020000  | -0.251903000 |
| 1 | 1.407387000  | 3.978535000  | -1.178463000 |
| 1 | 1.566737000  | 3.601010000  | 0.558940000  |
| 1 | 0.268932000  | 4.680948000  | -0.007395000 |
| 6 | 0.368548000  | -1.689817000 | -0.840291000 |
| 1 | -0.609969000 | -1.211140000 | -0.884009000 |
| 1 | 0.454161000  | -2.374853000 | -1.684702000 |
| 6 | 4.867623000  | -1.491292000 | 0.655328000  |
| 1 | 5.834827000  | -1.041580000 | 0.450276000  |
| 1 | 4.888196000  | -2.552131000 | 0.405452000  |
| 1 | 4.650961000  | -1.402432000 | 1.721895000  |
| 6 | 0.631003000  | -2.420410000 | 0.478758000  |
| 1 | 0.287469000  | -1.810161000 | 1.315264000  |
| 1 | 0.140818000  | -3.390724000 | 0.528603000  |
| 6 | 2.154694000  | -2.538141000 | 0.516786000  |
| 1 | 2.547679000  | -2.549554000 | 1.532144000  |
| 1 | 2.498196000  | -3.436018000 | -0.003475000 |
| 1 | 0.459576000  | 1.415071000  | -2.001162000 |
| 6 | -4.190754000 | -2.254197000 | -0.154689000 |
| 7 | -4.819457000 | -3.208455000 | -0.264669000 |

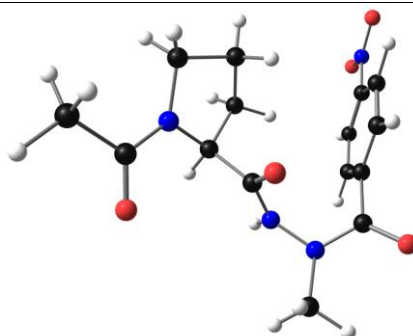

6

E = -1177.40269234

Level of theory: M062X/6-311+G(2d,p)

Solvent: Water

|   |              |              |              |
|---|--------------|--------------|--------------|
| 8 | 1.546159000  | 0.675476000  | 1.008447000  |
| 8 | -0.628195000 | 3.565265000  | 1.291280000  |
| 7 | 0.994030000  | 1.555616000  | -0.993320000 |
| 7 | 0.596094000  | 2.754622000  | -0.435428000 |
| 8 | 4.288269000  | -0.142381000 | -0.703827000 |
| 7 | 2.639868000  | -1.585337000 | -0.224854000 |
| 6 | 1.442654000  | 0.546095000  | -0.194363000 |
| 6 | -0.456261000 | 2.712553000  | 0.444068000  |
| 6 | -1.424031000 | 1.575668000  | 0.269003000  |
| 6 | 1.664257000  | -0.772369000 | -0.923336000 |
| 1 | 1.984609000  | -0.575030000 | -1.947111000 |
| 6 | 3.924437000  | -1.181141000 | -0.155899000 |
| 6 | -3.034836000 | 0.380971000  | -1.058628000 |
| 1 | -3.582809000 | 0.228157000  | -1.976700000 |
| 6 | -2.106827000 | 1.401397000  | -0.932004000 |
| 1 | -1.916056000 | 2.062921000  | -1.767735000 |
| 6 | -2.568916000 | -0.308397000 | 1.227975000  |
| 1 | -2.758202000 | -0.989168000 | 2.045032000  |
| 6 | -1.660114000 | 0.731011000  | 1.348478000  |
| 1 | -1.119751000 | 0.878348000  | 2.274360000  |
| 6 | -3.238189000 | -0.457888000 | 0.025046000  |
| 6 | 1.647050000  | 3.747940000  | -0.236364000 |
| 1 | 2.201597000  | 3.845371000  | -1.166358000 |
| 1 | 2.317903000  | 3.440364000  | 0.568249000  |
| 1 | 1.182198000  | 4.696260000  | 0.015645000  |
| 6 | 0.381715000  | -1.622459000 | -0.858113000 |
| 1 | -0.521110000 | -1.012214000 | -0.890611000 |
| 1 | 0.367362000  | -2.301770000 | -1.711239000 |
| 6 | 4.869372000  | -2.058958000 | 0.622912000  |
| 1 | 5.888078000  | -1.737718000 | 0.425955000  |
| 1 | 4.749755000  | -3.108471000 | 0.353532000  |
| 1 | 4.663933000  | -1.961733000 | 1.690924000  |
| 6 | 0.546408000  | -2.399701000 | 0.449977000  |
| 1 | 0.295622000  | -1.759005000 | 1.296668000  |
| 1 | -0.073492000 | -3.293168000 | 0.491036000  |
| 6 | 2.039206000  | -2.727721000 | 0.475928000  |
| 1 | 2.431074000  | -2.810723000 | 1.488337000  |
| 1 | 2.253007000  | -3.655206000 | -0.061607000 |
| 1 | 0.907317000  | 1.453894000  | -1.994573000 |
| 7 | -4.205166000 | -1.558841000 | -0.109529000 |
| 8 | -4.356945000 | -2.301046000 | 0.839609000  |
| 8 | -4.799335000 | -1.668007000 | -1.163006000 |

## 12. References

1. Bruker APEX 3, Version 2, User Manual S86 –EXS053 (Bruker AXS Inc., 2015).
2. Siemens, SMART system (Siemens Analytical X-ray Instruments Inc., 1995).
3. G. M. Sheldrick, SADABS (Bruker AXS Inc., 2007).
4. G. M. Sheldrick, *Acta Cryst. Sect. A.*, 2008, **64** (1), 112–122.
5. I. J. Bruno, J. C. Cole, P. R. Edgington, M. Kessler, C. F. Macrae, P. McCabe, J. Pearson and R. Taylor, *Acta Crystallogr. Sect. B.*, 2002, **58** (3), 389-397.
6. Gaussian 09, Revision D.01, M. J. Frisch, G. W. Trucks, H. B. Schlegel, G. E. Scuseria, M. A. Robb, J. R. Cheeseman, Jr. J. A. Montgomery, T. Vreven, K. N. Kudin, J. C. Burant, J. M. Millam, S. S. Iyengar, J. Tomasi, V. Barone, B. Mennucci, M. Cossi, G. Scalmani, N. Rega, G. A. Petersson, H. Nakatsuji, M. Hada, M. Ehara, K. Toyota, S35R. Fukuda, J. Hasegawa, M. Ishida, T. Nakajima, Y. Honda, O. Kitao, H. Nakai, M. Klene, X. Li, J. E. Knox, H. P. Hratchian, J. B. Cross, C. Adamo, J. Jaramillo, R. Gomperts, R. E. Stratmann, O. Yazyev, A. J. Austin, R. Cammi, C. Pomelli, J. W. Ochterski, P. Y. Ayala, K. Morokuma, G. A. Voth, P. Salvador, J. J. Dannenberg, V. G. Zakrzewski, S. Dapprich, A. D. Daniels, M. C. Strain, O. Farkas, D. K. Malick, A. D. Rabuck, K. Raghavachari, J. B. Foresman, J. V. Ortiz, Q. Cui, A. G. Baboul, S. Clifford, J. Cioslowski, B. B. Stefanov, G. Liu, A. Liashenko, P. Piskorz, I. Komaromi, R. L. Martin, D. J. Fox, T. Keith, M. A. Al-Laham, C. Y. Peng, A. Nanayakkara, M. Challacombe, P. M. W. Gill, B. Johnson, W. Chen, M. W. Wong, C. Gonzalez and J. A. Pople, Gaussian, Inc., Wallingford CT, 2013.
7. Y. Zhao and D. G. Truhlar, *Theor. Chem. Acc.*, 2008, **120**, 215–241.
8. A. V. Marenich, C. J. Cramer and D. G. Truhlar, *J. Phys. Chem. B*, 2009, **113** (18), 6378-6396.
9. E. D. Glendening, A. E. Reed, J. E. Carpenter and F. Weinhold, NBO Version 3.1; University of Wisconsin: Madison.
10. (a) E. D. Glendening and J. A. Hrabal, *J. Am. Chem. Soc.*, 1997, **119** (52), 12940-12946, (b) C. R. Kemnitz and M. J. Loewen, *J. Am. Chem. Soc.*, 2007, **129** (9), 2521-2528.
11. (a) M. H. Abraham and R. J. Abraham, *New J. Chem.*, 2017, **41**, 6064–6066; (b) M. H. Abraham, R. J. Abraham, W. E. Acree, Jr., A. E. Aliev, Al. J. Leo and W. L. Whaley, *J. Org. Chem.*, 2014, **79** (22), 11075-11083; (c) M. H. Abraham, R. J. Abraham, J. Byrne and L. Griffiths, *J. Org. Chem.*, 2006, **71** (9), 3389-3394.
12. F. A. Carey and R. J. Sundberg, In *Advanced Organic Chemistry, Part A: Structure and Mechanisms*, 5th Ed., Springer US, 2007, pp. 336-339.
